# Supplementary material
Source: PubMed Central journal article supplement (PMC4518477)
Supplement: NIHMS690711-supplement-1.pdf [file NIHMS690711-supplement-1.pdf]

---

# Enzymatic Hydroxylation of an Unactivated Methylene C–H Bond Guided by Molecular Dynamics Simulations

Alison R. H. Narayan, Gonzalo Jiménez-Osés, Peng Liu, Solymar Negretti, Wanxiang Zhao, Michael M. Gilbert, Raghunath O. Ramabhadran, Yun-Fang Yang, Lawrence R. Furan, Zhe Li, Larissa M. Podust, John Montgomery\*, K. N. Houk\*, and David H. Sherman\*

## Supporting Information

|                                                                                                                                                                                             |    |
|---------------------------------------------------------------------------------------------------------------------------------------------------------------------------------------------|----|
| <b>Part I: Computations</b> .....                                                                                                                                                           | 3  |
| <b>Supplementary Figure S1.</b> QM modeling of the iron-oxo heme group and menthol substrate .....                                                                                          | 3  |
| <b>Supplementary Figure S2:</b> QM transition-states for C–H abstraction.....                                                                                                               | 4  |
| <b>Supplementary Table S1.</b> Energies, enthalpies, free energies, and entropies of the QM structures calculated for the heme iron-catalyzed H-abstraction .....                           | 5  |
| <b>Supplementary Table S2.</b> Energies, enthalpies, free energies, and entropies of the QM structures calculated for the estimation of the BDE of various C–H bonds in menthol .....       | 6  |
| <b>Supplementary Figure S3:</b> Salt bridges between (–)-menthol derivatives <b>21</b> , <b>25</b> and <b>26</b> in PikC <sub>WT</sub> monitored throughout MD simulations.....             | 7  |
| <b>Supplementary Figure S4:</b> Salt bridges between (–)-menthol derivatives <b>21</b> , <b>25</b> and <b>26</b> in PikC <sub>D50N</sub> monitored throughout MD simulations.....           | 8  |
| <b>Supplementary Figure S5:</b> Salt bridges between (–)-menthol derivatives <b>21</b> , <b>25</b> and <b>26</b> in PikC <sub>WT</sub> monitored throughout MD simulations.....             | 9  |
| <b>Supplementary Figure S6:</b> Salt bridges between (–)-menthol derivatives <b>21</b> , <b>25</b> and <b>26</b> in PikC <sub>D50N</sub> monitored throughout MD simulations.....           | 10 |
| <b>Supplementary Figure S7:</b> Salt bridges between (–)-menthol derivatives <b>21</b> , <b>25</b> and <b>26</b> in PikC <sub>D50ND176QE246A</sub> monitored throughout MD simulations..... | 11 |
| <b>Supplementary Figure S8:</b> Salt bridges between (+)-menthol derivatives <b>21</b> , <b>25</b> and <b>26</b> in PikC <sub>D50ND176QE246A</sub> monitored throughout MD simulations..... | 12 |
| <b>Supplementary Figure S9:</b> Representative open and closed conformations of PikC derived from MD simulations .....                                                                      | 13 |

---

|                                                                                                                                                                                                                         |    |
|-------------------------------------------------------------------------------------------------------------------------------------------------------------------------------------------------------------------------|----|
| <b>Supplementary Figure S10:</b> Stereoselectivity in the C4–H abstraction catalyzed by PikC <sub>D50N</sub> in (–)-menthol derivatives <b>21</b> , <b>25</b> and <b>26</b> derived from MD simulations .....           | 14 |
| <b>Supplementary Figure S11:</b> Stereoselectivity in the C4–H abstraction catalyzed by PikC <sub>D50N</sub> in (+)-menthol derivatives <b>21</b> , <b>25</b> and <b>26</b> derived from MD simulations .....           | 14 |
| <b>Supplementary Figure S12:</b> Stereoselectivity in the C4–H abstraction catalyzed by PikC <sub>D50ND176QE246A</sub> in (–)-menthol derivatives <b>21</b> , <b>25</b> and <b>26</b> derived from MD simulations ..... | 15 |
| <b>Supplementary Figure S13:</b> Stereoselectivity in the C4–H abstraction catalyzed by PikC <sub>D50ND176QE246A</sub> in (+)-menthol derivatives <b>21</b> , <b>25</b> and <b>26</b> derived from MD simulations ..... | 15 |
| <b>Supplementary Figure S14:</b> Protocol for concurrent protein and substrate engineering guided by molecular dynamics (MD) simulations.....                                                                           | 16 |
| <b>Part II: Substrate Synthesis</b> .....                                                                                                                                                                               | 17 |
| <b>Part III: Biochemistry</b> .....                                                                                                                                                                                     | 27 |
| <b>Part IV: Product Characterization</b> .....                                                                                                                                                                          | 50 |
| <b><sup>1</sup>H and <sup>13</sup>C NMR Spectra</b> .....                                                                                                                                                               | 52 |
| <b>Cartesian coordinates of optimized geometries</b> .....                                                                                                                                                              | 81 |

**Supplementary Figure S1. (a) QM modeling of the iron-oxo heme group.** The P450 protein-bound porphyrin complex coordinated with iron, and containing an Fe=O moiety is known as compound I (**cl**). In our computational model for compound I substituents at the periphery of the porphyrin moiety were replaced with hydrogen atoms. Additionally, the axial Fe–SCys bond in compound I was modeled as a Fe–SCH<sub>3</sub> bond. For these heme systems, the spin-state energetics, and activation barriers are highly dependent upon both the level of theory employed, as well as the approximation chosen to model compound I (1, 2). In agreement with previous work, our model of compound I shows almost degenerate doublet and quartet states, the sextet state being significantly higher in energy. The quartet C–H abstraction transition-states were calculated to be consistently lower in energy than the doublet spin states. Hence, all the reported activation free-energies ( $\Delta G^\ddagger$ ) correspond to C–H abstraction on the quartet potential energy surface. **(b) Model menthol substrate.** An acetyl group was used to replace the different anchoring groups employed experimentally. The different C–H abstraction sites are labeled.

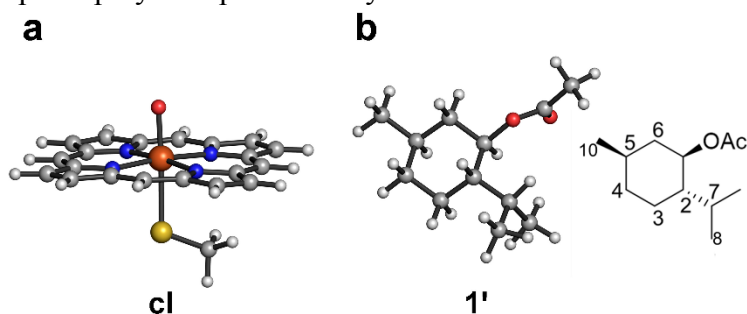

**Supplementary Figure S2: QM transition-states for C–H abstraction** of (a) primary, (b) secondary and (c) tertiary carbons from the model menthol substrate calculated at the B3LYP/6-311G(d,p)+LanL2DZ(Fe)//B3LYP/6-311G(d)+ LanL2DZ(Fe) in the quartet spin state.

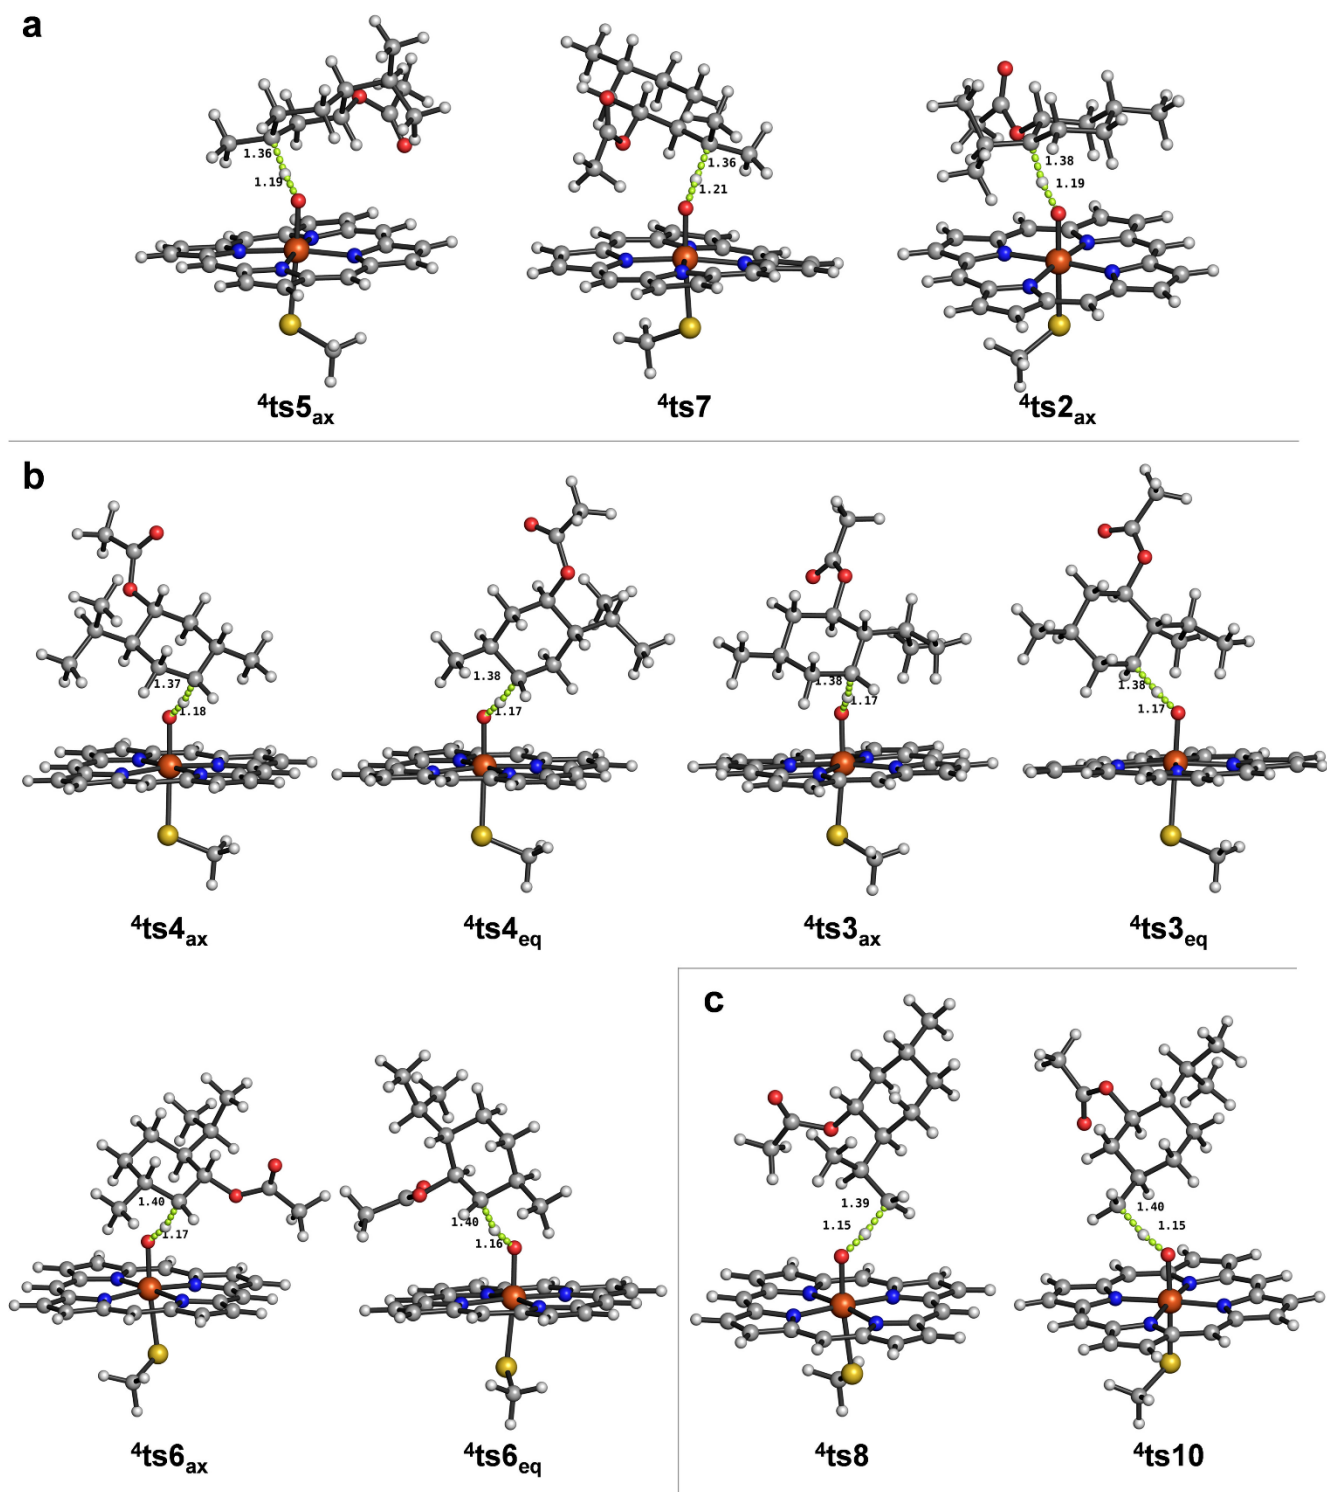

**Supplementary Table S1. Energies, enthalpies, free energies, and entropies of the QM structures calculated for the heme iron-catalyzed H-abstraction.<sup>a</sup>**

| Structure <sup>a</sup>              | $E_0^b$                | $E_0^c$                | $E_0^d$                | ZPE <sup>e</sup>                   | H correction <sup>e</sup>          | $S^e$                                                 | G correction <sup>e</sup>          | Lowest freq. <sup>e</sup> |
|-------------------------------------|------------------------|------------------------|------------------------|------------------------------------|------------------------------------|-------------------------------------------------------|------------------------------------|---------------------------|
|                                     | (Hartree) <sup>f</sup> | (Hartree) <sup>f</sup> | (Hartree) <sup>f</sup> | (Hartree /particle) <sup>f,g</sup> | (Hartree /particle) <sup>f,h</sup> | (cal mol <sup>-1</sup> K <sup>-1</sup> ) <sup>h</sup> | (Hartree /particle) <sup>f,h</sup> | (cm <sup>-1</sup> )       |
| <b>cI</b>                           | -1625.429856           | -1625.588831           | -1625.092550           | 0.317697                           | 0.341284                           | 158.5                                                 | 0.265983                           | 46.1                      |
| <b>1'</b>                           | -621.1914961           | -621.2682711           | -620.750481            | 0.326652                           | 0.343590                           | 128.1                                                 | 0.282717                           | 28.8                      |
| <b><sup>4</sup>ts2</b>              | -2246.589006           | -2246.848654           | -2245.834605           | 0.638415                           | 0.679460                           | 241.7                                                 | 0.564639                           | -1812.5                   |
| <b><sup>4</sup>ts3<sub>ax</sub></b> | -2246.591242           | -2246.847873           | -2245.833509           | 0.638093                           | 0.679081                           | 243.7                                                 | 0.563277                           | -1725.3                   |
| <b><sup>4</sup>ts3<sub>eq</sub></b> | -2246.588585           | -2246.841288           | -2245.811992           | 0.637641                           | 0.678977                           | 245.9                                                 | 0.562154                           | -1789.2                   |
| <b><sup>4</sup>ts4<sub>ax</sub></b> | -2246.593458           | -2246.846869           | -2245.830985           | 0.638267                           | 0.679340                           | 247.4                                                 | 0.561769                           | -1717.3                   |
| <b><sup>4</sup>ts4<sub>eq</sub></b> | -2246.592847           | -2246.843426           | -2245.827675           | 0.638330                           | 0.679468                           | 246.8                                                 | 0.562198                           | -1668.2                   |
| <b><sup>4</sup>ts5</b>              | -2246.592876           | -2246.848492           | -2245.820121           | 0.637831                           | 0.679099                           | 244.1                                                 | 0.563116                           | -1826.0                   |
| <b><sup>4</sup>ts6<sub>ax</sub></b> | -2246.588444           | -2246.844157           | -2245.828430           | 0.638336                           | 0.679265                           | 243.0                                                 | 0.563797                           | -1757.8                   |
| <b><sup>4</sup>ts6<sub>eq</sub></b> | -2246.585981           | -2246.840738           | -2245.825359           | 0.638040                           | 0.678981                           | 242.6                                                 | 0.563715                           | -1747.4                   |
| <b><sup>4</sup>ts7</b>              | -2246.589755           | -2246.849199           | -2245.835225           | 0.638607                           | 0.679370                           | 240.4                                                 | 0.565164                           | -1803.3                   |
| <b><sup>4</sup>ts8</b>              | -2246.589756           | -2246.849199           | -2245.835225           | 0.638512                           | 0.679251                           | 245.6                                                 | 0.562568                           | -1651.3                   |
| <b><sup>4</sup>ts10</b>             | -2246.590098           | -2246.838515           | -2245.822824           | 0.638410                           | 0.679327                           | 247.6                                                 | 0.561669                           | -1644.1                   |

<sup>a</sup> Except for the model menthol substrate (**1'**, singlet), all species correspond to quartet spin states; all species are neutral.

<sup>b</sup> Energy obtained from single-point calculations with **B3LYP/6-311+G(d,p)+LANL2DZ(Fe)**.

<sup>c</sup> Energy obtained from single-point calculations with **B3LYP-D3/6-311+G(2d,p)+LANL2DZ(Fe)**.

<sup>d</sup> Energy obtained from single-point calculations with **M06/6-311+G(2d,p)+SDD(Fe)**.

<sup>e</sup> Vibrational, thermal and entropic corrections obtained from frequency calculations on geometries optimized at the B3LYP/6-31G(d) level.

<sup>f</sup> 1 Hartree = 627.51 kcal mol<sup>-1</sup>.

<sup>g</sup> Zero-point energy obtained from vibrational frequencies.

<sup>h</sup> Thermal corrections at 298.15 K.

**Supplementary Table S2. Energies, enthalpies, free energies, and entropies of the QM structures calculated for the estimation of the BDE of various C–H bonds in menthol.**

| Structure <sup>a</sup> | $E_0^b$                | ZPE <sup>c</sup>                   | H correction <sup>c</sup>          | S <sup>c</sup>                                        | G correction <sup>c</sup>          | Lowest freq. <sup>c</sup> |
|------------------------|------------------------|------------------------------------|------------------------------------|-------------------------------------------------------|------------------------------------|---------------------------|
|                        | (Hartree) <sup>d</sup> | (Hartree /particle) <sup>d,e</sup> | (Hartree /particle) <sup>d,f</sup> | (cal mol <sup>-1</sup> K <sup>-1</sup> ) <sup>f</sup> | (Hartree /particle) <sup>d,f</sup> | (cm <sup>-1</sup> )       |
| <b>1</b>               | -467.341795            | 0.288358                           | 0.301842                           | 107.8                                                 | 0.250604                           | 47.2                      |
| <b>H</b>               | -0.499810              | 0.000000                           | 0.002360                           | 27.4                                                  | -0.010654                          |                           |
| <b>2</b>               | -466.672915            | 0.273805                           | 0.287692                           | 111.8                                                 | 0.234572                           | 52.5                      |
| <b>3</b>               | -466.674067            | 0.273394                           | 0.287455                           | 113.0                                                 | 0.233766                           | 45.9                      |
| <b>4</b>               | -466.672024            | 0.274335                           | 0.288074                           | 112.8                                                 | 0.234502                           | 19.7                      |
| <b>5</b>               | -466.668688            | 0.273950                           | 0.287649                           | 110.4                                                 | 0.235206                           | 38.3                      |
| <b>6</b>               | -466.668687            | 0.273927                           | 0.287624                           | 110.1                                                 | 0.235291                           | 44.6                      |
| <b>7</b>               | -466.669666            | 0.273630                           | 0.287408                           | 110.4                                                 | 0.234969                           | 51.8                      |
| <b>8</b>               | -466.669668            | 0.273649                           | 0.287412                           | 110.1                                                 | 0.235080                           | 57.3                      |
| <b>9</b>               | -466.671031            | 0.273337                           | 0.287158                           | 110.6                                                 | 0.234617                           | 45.7                      |
| <b>10</b>              | -466.671040            | 0.273388                           | 0.287187                           | 110.4                                                 | 0.234754                           | 49.2                      |
| <b>11</b>              | -466.667896            | 0.273072                           | 0.286884                           | 110.2                                                 | 0.234510                           | 63.6                      |
| <b>12</b>              | -466.666649            | 0.273132                           | 0.287008                           | 111.1                                                 | 0.234233                           | 47.5                      |

<sup>a</sup> Except for the model menthol substrate (singlet), all species correspond to doublet spin states; all species are neutral

<sup>b</sup> Energy obtained from single-point calculations with SCS-MP2/cc- pVTZ.

<sup>c</sup> Vibrational, thermal and entropic corrections obtained from frequency calculations on geometries optimized at the B3LYP/6-31G(d) level.

<sup>d</sup> 1 Hartree = 627.51 kcal mol<sup>-1</sup>.

<sup>e</sup> Zero-point energy obtained from vibrational frequencies.

<sup>f</sup> Thermal corrections at 298.15 K.

**Supplementary Figure S3: Salt bridges between (–)-menthol derivatives 21, 25 and 26 in  $\text{PikC}_{\text{WT}}$  monitored throughout MD simulations.** The distance (in angstroms) between the center of mass of the two carboxylate oxygen atoms of Asp/Glu residues and the nitrogen atom of the dimethylammonium atom of the anchoring group is represented.

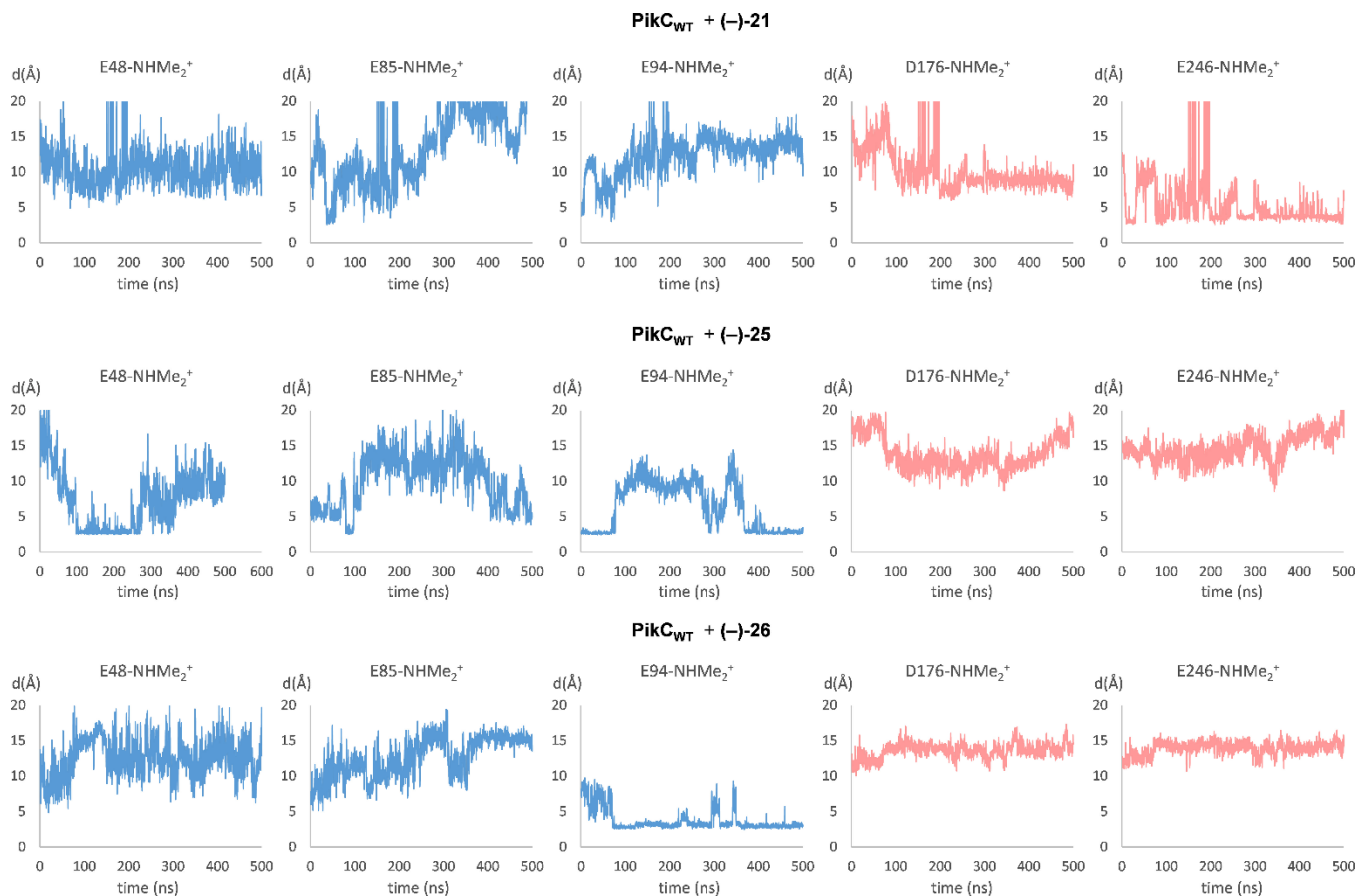

**Supplementary Figure S4: Salt bridges between (-)-menthol derivatives 21, 25 and 26 in  $\text{PikC}_{\text{D50N}}$  monitored throughout MD simulations.** The distance (in angstroms) between the center of mass of the two carboxylate oxygen atoms of Asp/Glu residues and the nitrogen atom of the dimethyl ammonium moiety of the anchoring group is represented.

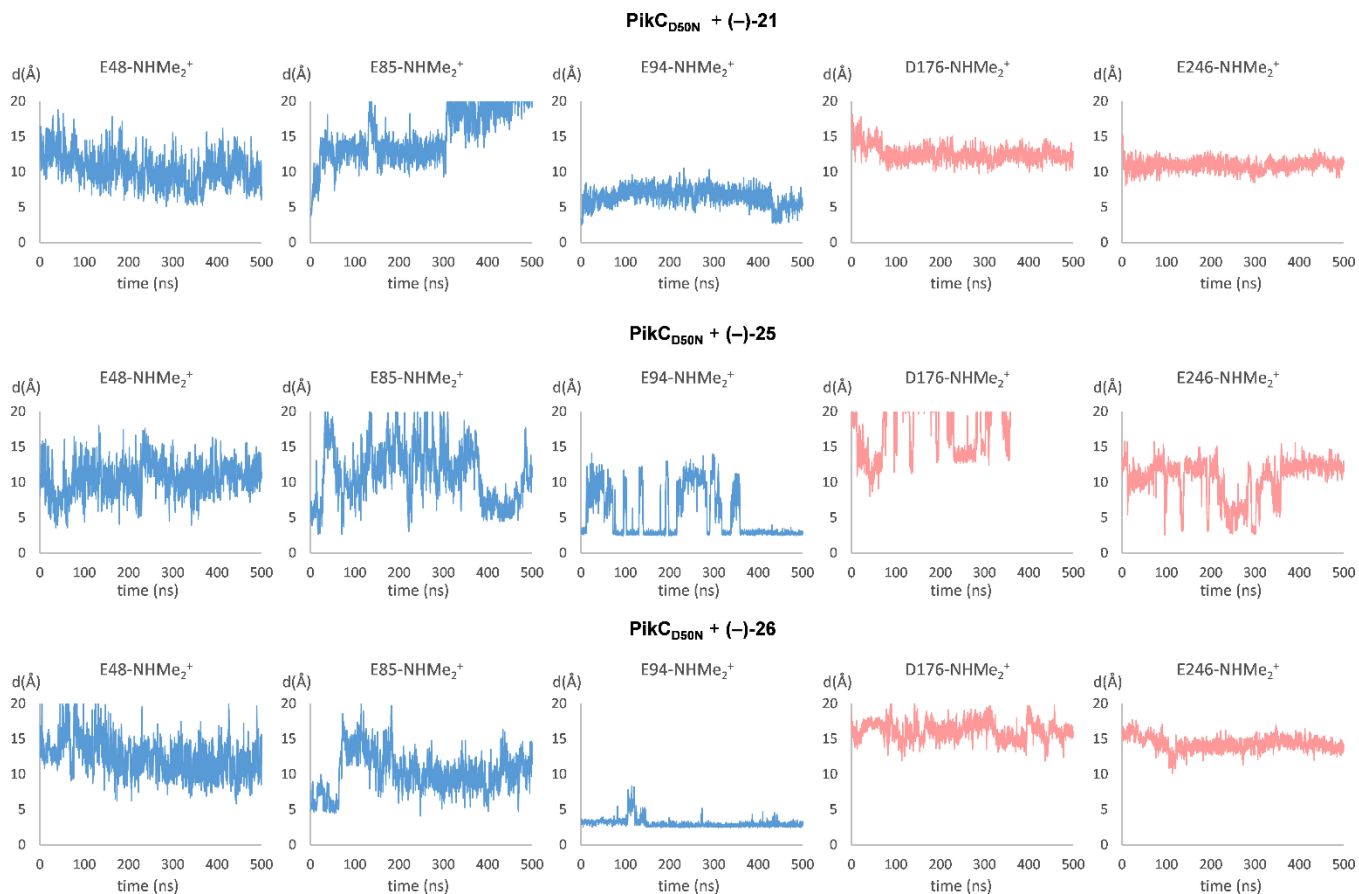



**Supplementary Figure S5: Salt bridges between (+)-menthol derivatives 21, 25 and 26 in  $\text{PikC}_{\text{WT}}$  monitored throughout MD simulations.** The distance (in angstroms) between the center of mass of the two carboxylate oxygen atoms of Asp/Glu residues and the nitrogen atom of the dimethyl ammonium moiety of the anchoring group is represented.

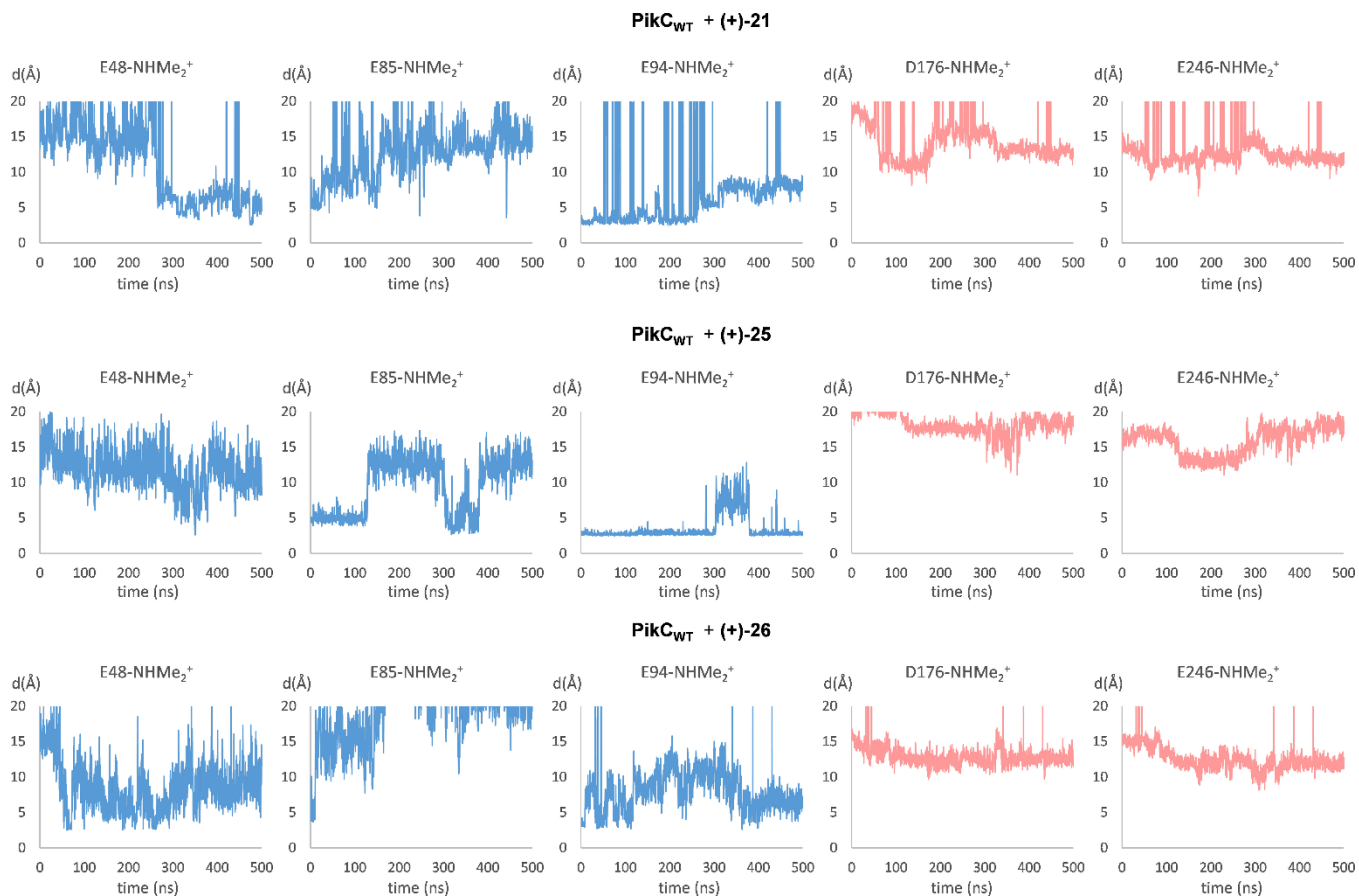

**Supplementary Figure S6: Salt bridges between (+)-menthol derivatives 21, 25 and 26 in  $\text{PikC}_{\text{D50N}}$  monitored throughout MD simulations.** The distance (in angstroms) between the center of mass of the two carboxylate oxygen atoms of Asp/Glu residues and the nitrogen atom of the dimethyl ammonium moiety of the anchoring group is represented.

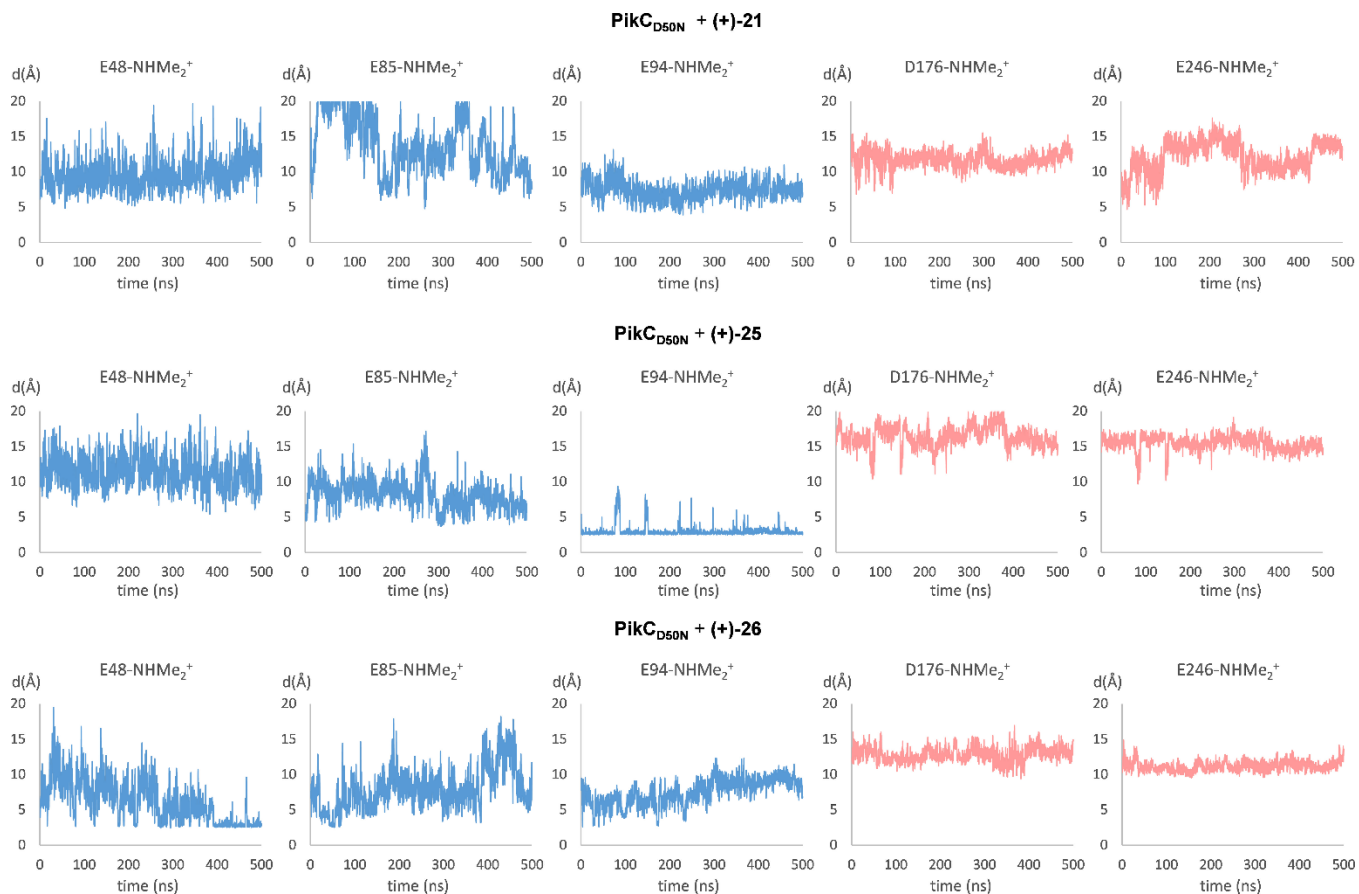

**Supplementary Figure S7: Salt bridges between (-)-menthol derivatives 21, 25 and 26 in  $\text{PikC}_{\text{D50ND176QE246A}}$  monitored throughout MD simulations.** The distance (in angstroms) between the center of mass of the two carboxylate oxygen atoms of Asp/Glu residues and the nitrogen atom of the dimethyl ammonium moiety of the anchoring group is represented.

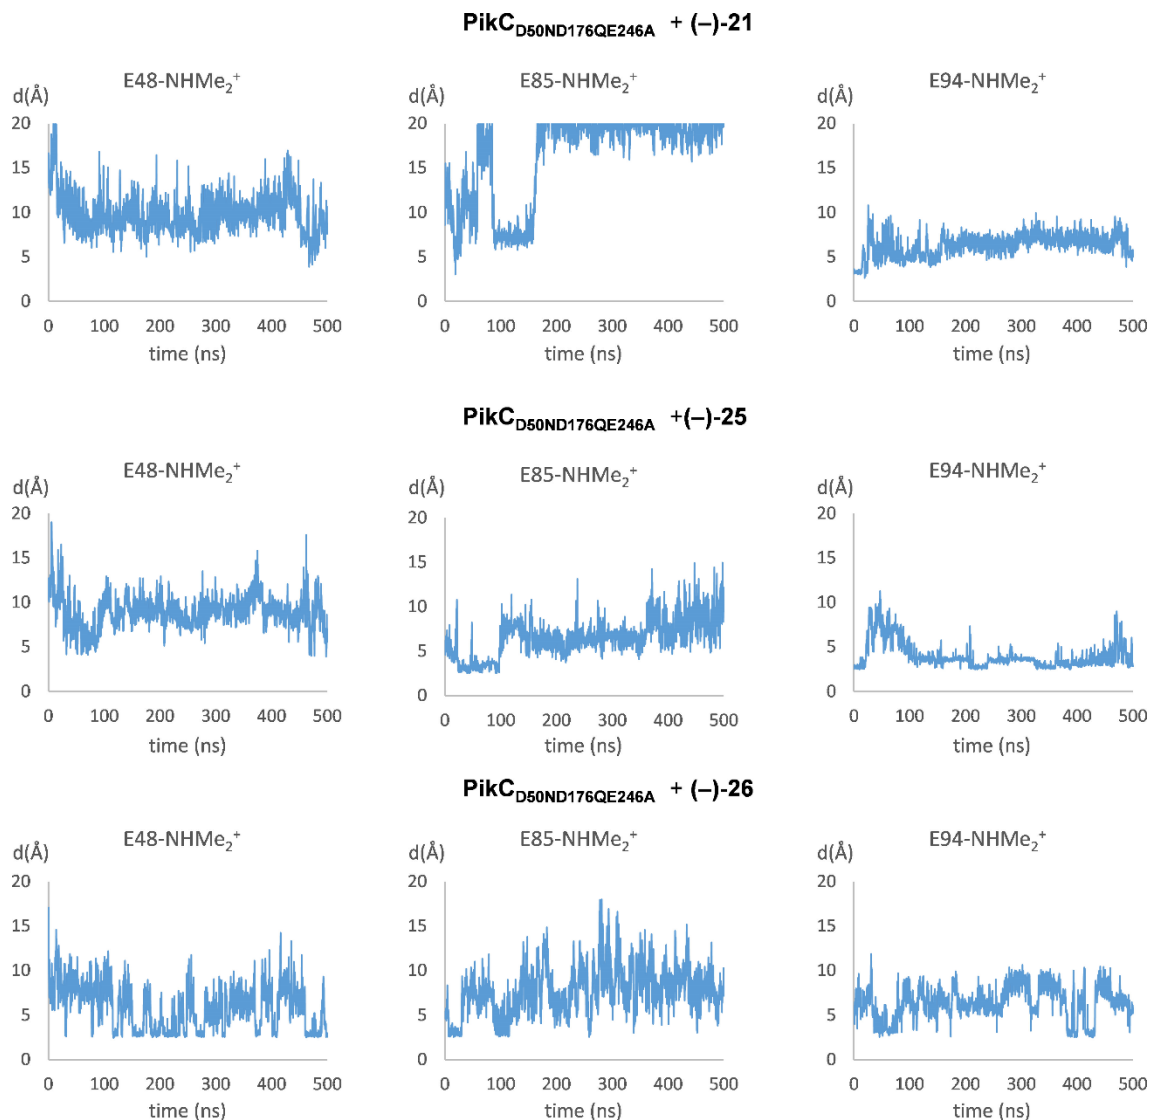

**Supplementary Figure S8: Salt bridges between (+)-menthol derivatives 21, 25 and 26 in  $\text{PikC}_{\text{D50ND176QE246A}}$  monitored throughout MD simulations.** The distance (in angstroms) between the center of mass of the two carboxylate oxygen atoms of Asp/Glu residues and the nitrogen atom of the dimethyl ammonium moiety of the anchoring group is represented.

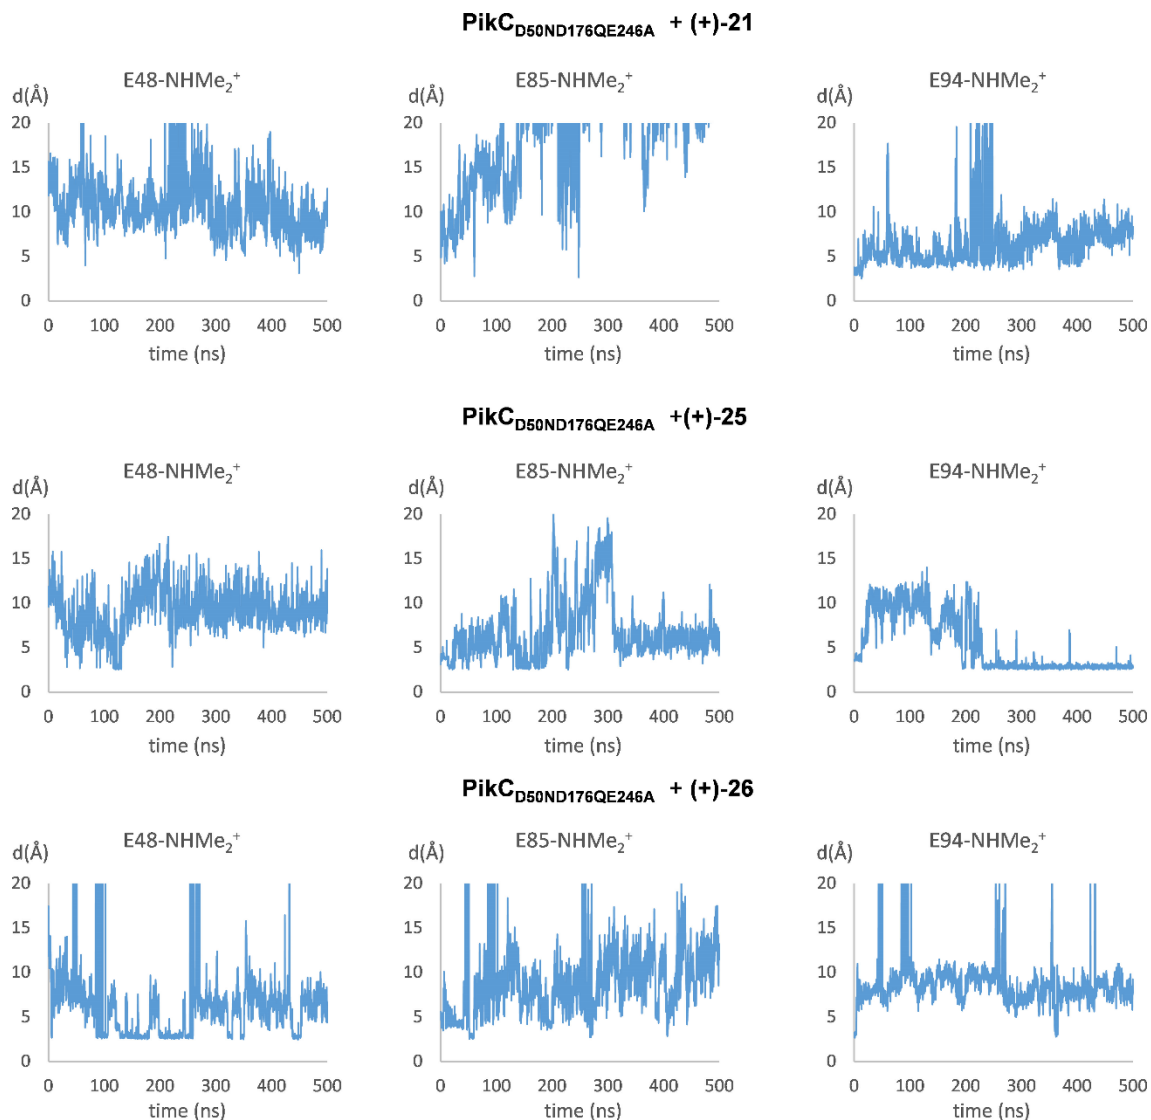

**Supplementary Figure S9: Representative (a) open and (b) closed conformations in PikC derived from MD simulations.** The distance (in angstroms) between the C $\alpha$  of A185 and M394 was selected to represent the width of the active site channel and the deviation from the catalytically active closed conformation. (c-e) Evolution of the active site channel in PikC variants in the presence and absence of substrates. The closed conformation is more frequently sampled in the PikC<sub>D50ND176QE246A</sub> mutant even in the *apo* state.

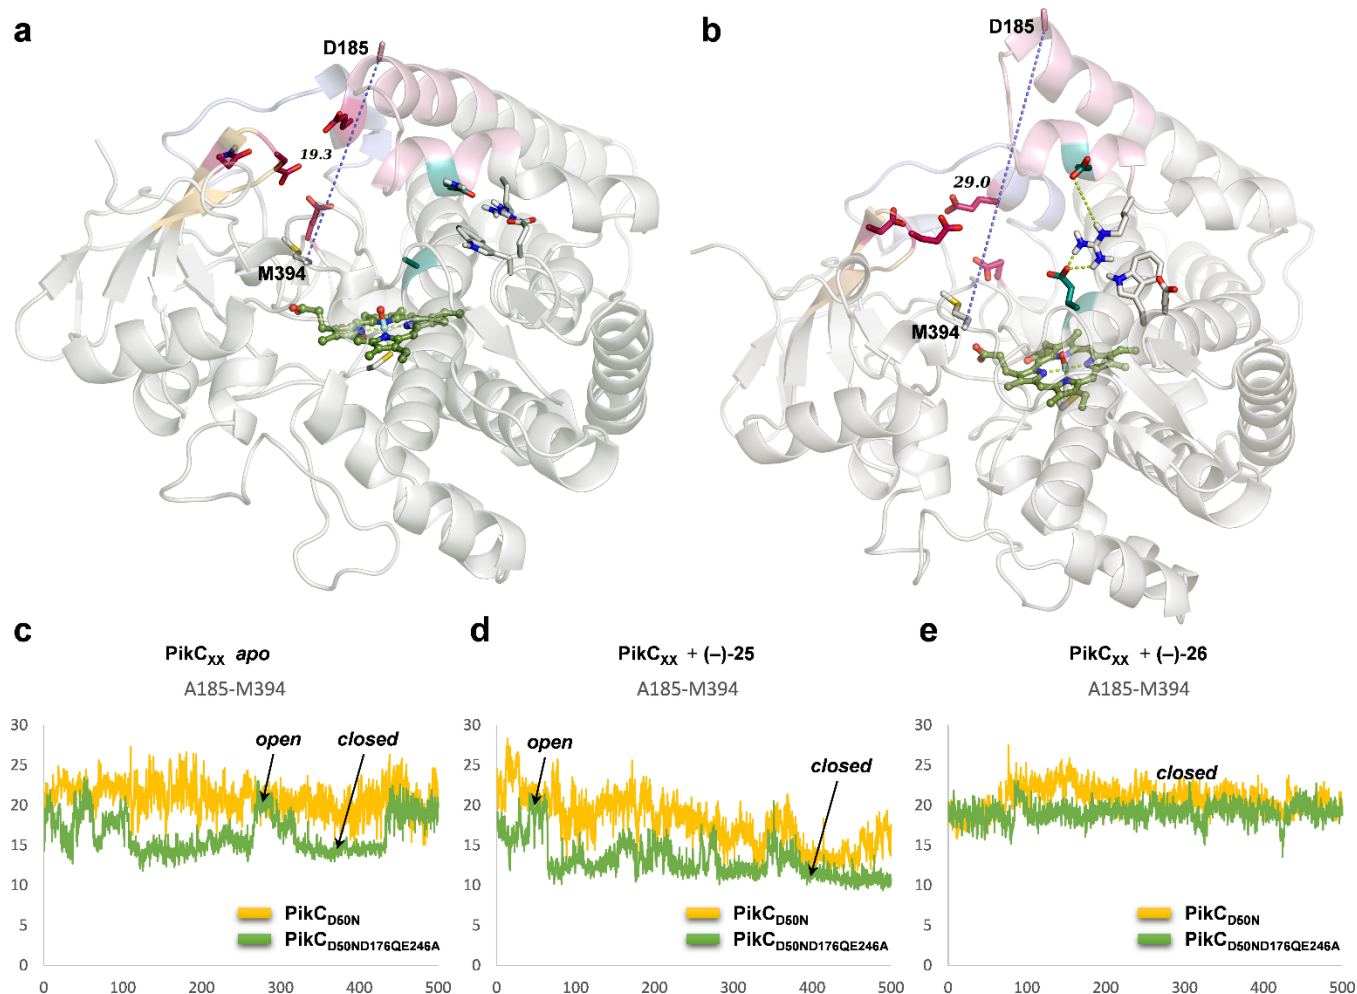

**Supplementary Figure S10: Stereoselectivity in the C4–H abstraction catalyzed by  $\text{PikC}_{\text{D50N}}$ .** Orientation of  $\text{H4}_{\text{eq}}$  (in green) and  $\text{H4}_{\text{ax}}$  (in orange) of (–)-menthol (substrates **21**, **25** and **26**) relative to the iron-heme oxo group in  $\text{PikC}_{\text{D50N}}$ , derived from 500 ns MD trajectories. Deviations of the distances (x axis) and angles (y axis) from the quantum mechanically optimized transition structure (in blue) with a hypothetical model heme catalyst are shown.

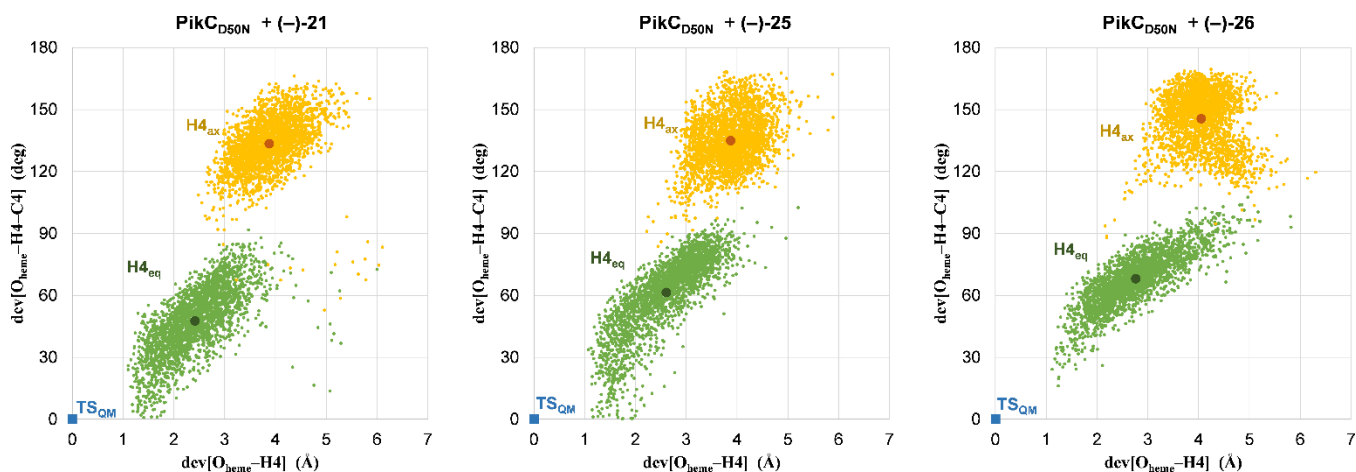

**Supplementary Figure S11: Stereoselectivity in the C4–H abstraction catalyzed by  $\text{PikC}_{\text{D50N}}$ .** Orientation of  $\text{H4}_{\text{eq}}$  (in green) and  $\text{H4}_{\text{ax}}$  (in orange) of (+)-menthol (substrates **21**, **25** and **26**) relative to the iron-heme oxo group in  $\text{PikC}_{\text{D50N}}$ , derived from 500 ns MD trajectories. Deviations of the distances (x axis) and angles (y axis) from the quantum mechanically optimized transition structure (in blue) with a hypothetical model heme catalyst are shown.

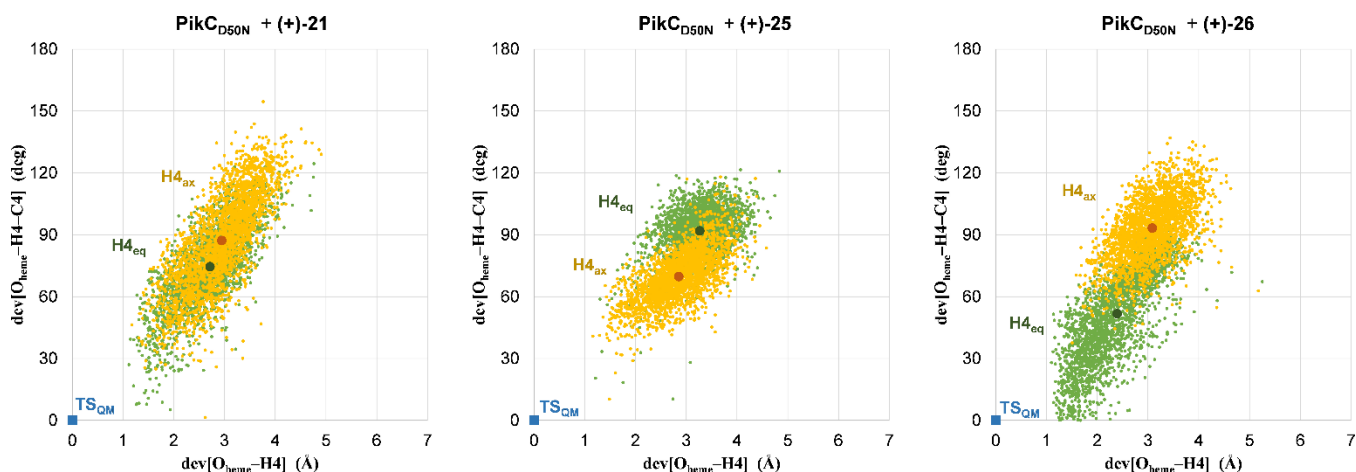

**Supplementary Figure S12: Stereoselectivity in the C4–H abstraction catalyzed by  $\text{PikC}_{\text{D50ND176QE246A}}$ .** Orientation of  $\text{H4}_{\text{eq}}$  (in green) and  $\text{H4}_{\text{ax}}$  (in orange) of (–)-menthol (substrates **21**, **25** and **26**) relative to the iron-heme oxo group in  $\text{PikC}_{\text{D50ND176QE246A}}$ , derived from 500 ns MD trajectories. Deviations of the distances (x axis) and angles (y axis) from the quantum mechanically optimized transition structure (in blue) with a hypothetical model heme catalyst are shown.

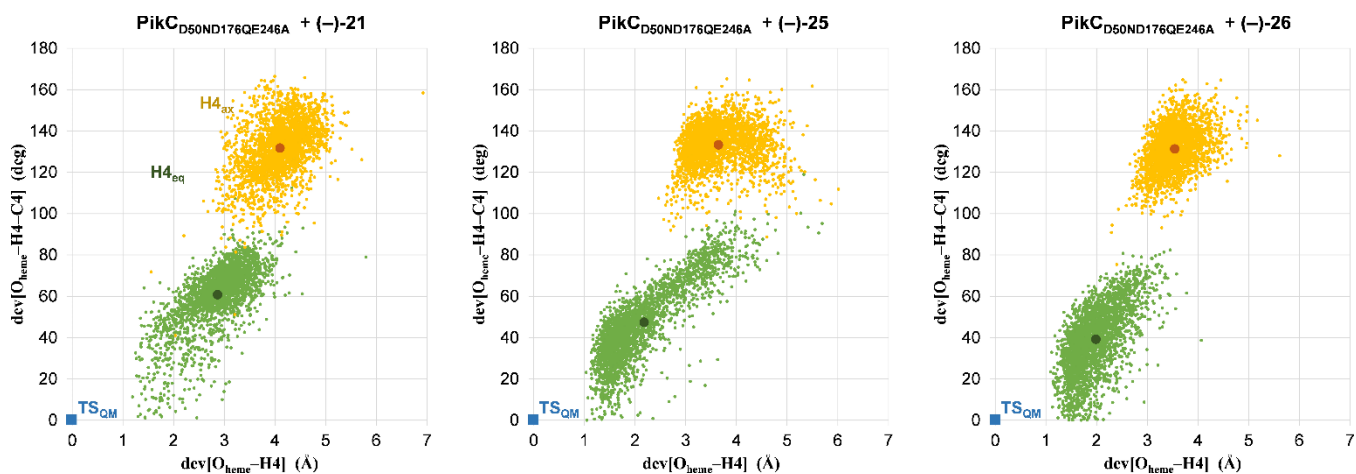

**Supplementary Figure S13: Stereoselectivity in the C4–H abstraction catalyzed by  $\text{PikC}_{\text{D50ND176QE246A}}$ .** Orientation of  $\text{H4}_{\text{eq}}$  (in green) and  $\text{H4}_{\text{ax}}$  (in orange) of (+)-menthol (substrates **21**, **25** and **26**) relative to the iron-heme oxo group in  $\text{PikC}_{\text{D50ND176QE246A}}$ , derived from 500 ns MD trajectories. Deviations of the distances (x axis) and angles (y axis) from the quantum mechanically optimized transition structure (in blue) with a hypothetical model heme catalyst are shown.

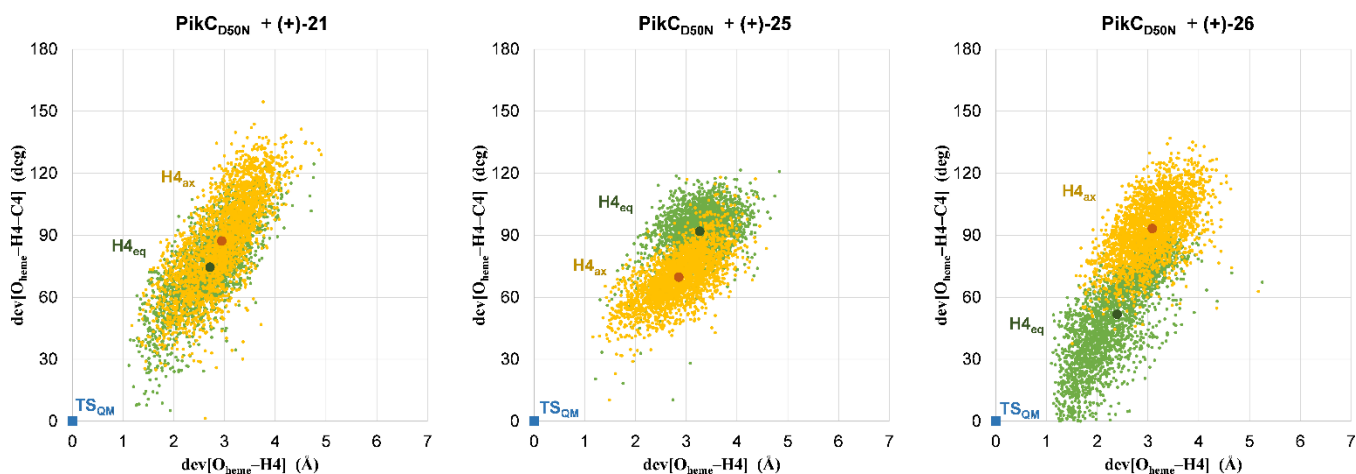

**Supplementary Figure S14: Protocol for concurrent protein and substrate engineering guided by molecular dynamics (MD) simulations.** The wild-type protein and a substrate candidate are subjected to MD in order to identify suitable positions for mutation. The beneficial or detrimental effect of these mutations in both substrate binding and protein structure is re-evaluated through MD. The improved mutants are tested against a modified version of the substrate. Only those candidates with enhanced substrate binding that preserve the protein closed conformation are subjected to experimental evaluation of their catalytic activity; in the positive cases, stereoselectivity is determined by combination of experimental and theoretical (QM, MD) techniques.

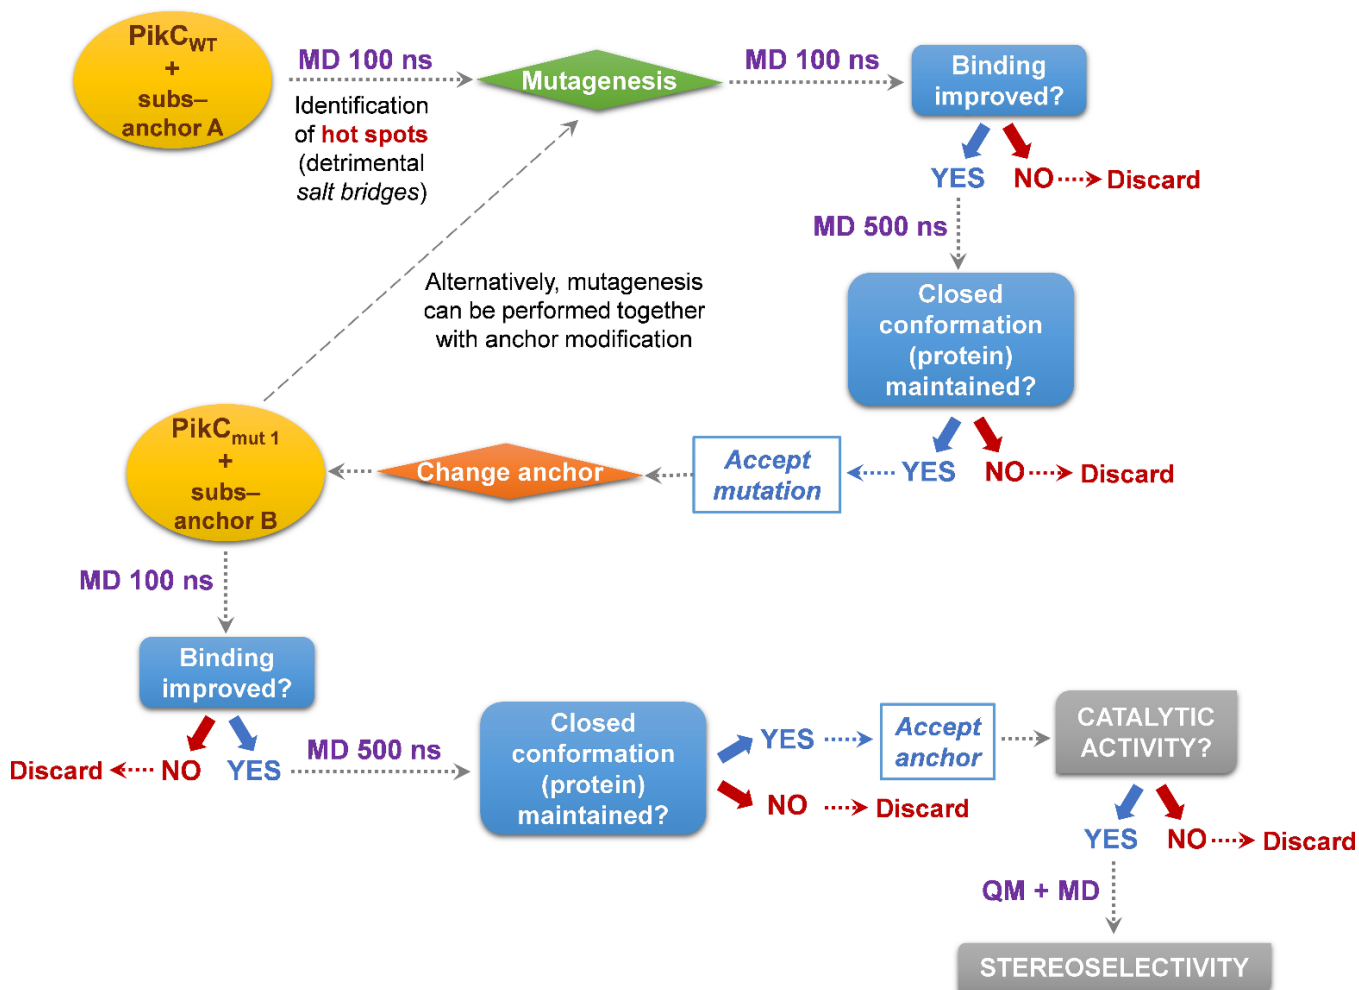



## Part II: Substrate synthesis

### General Protocols

All reagents were used as received unless otherwise noted. Solvents were purified under nitrogen using a solvent purification system (Innovative Technology, inc., Model # SPS-400-3 and PS-00-3. Reactions were monitored by thin layer chromatography using SiliCycle silica gel 60 F254 precoated plates (0.25 mm) which were visualized using UV light, *p*-anisaldehyde, KMnO<sub>4</sub>, PMA or CAM stain. Flash column chromatography was performed using Kieselgel 60 (230–400 mesh) silica gel. Eluent mixtures are reported as v:v percentages of the minor constituent in the major constituent. All compounds purified by column chromatography were sufficiently pure for use in further experiments unless otherwise indicated. <sup>1</sup>H and <sup>13</sup>C spectra were obtained in CDCl<sub>3</sub> at rt (25 °C), unless otherwise noted, on Varian nmrs (500 MHz or 700 MHz), Varian MR400 or Varian Unity 500 MHz. Chemical shifts of <sup>1</sup>H NMR spectra were recorded in parts per million (ppm) on the δ scale from an internal standard of residual chloroform (7.26 ppm). Chemical shifts of <sup>13</sup>C NMR spectra were recorded in ppm from the central peak of CDCl<sub>3</sub> (77.0 ppm) on the δ scale. Low resolution electrospray mass spectra were obtained on a Micromass LCT spectrometer and high resolution electrospray mass spectra were obtained on a Micromass AutoSpec Ultima spectrometer at the University of Michigan Mass Spectrometry Laboratory.

### Synthesis of menthol substrates:

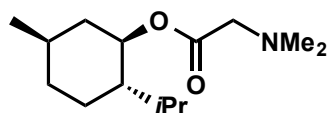

(–)-21

### (1R,2S,5R)-2-isopropyl-5-methylcyclohexyl dimethylglycinate, (–)-21

A flame-dried round-bottom flask was charged with (0.42 g) N,N-dimethylamino glycine•HCl (1.5 equiv), 0.62 g DCC (1.5 equiv), and 0.37 g DMAP (1.5 equiv). The contents of the flask were suspended in 20 mL of CH<sub>2</sub>Cl<sub>2</sub> and allowed to stir for ~5 min. 0.47 mL of distilled triethylamine (1.7 equiv) was added dropwise and the reaction was allowed to stir for an additional 5 min before 0.31 g of (–)-menthol (1.0 equiv) was added. The reaction was stirred for 7 d and was then filtered through a cotton plug. The solvent was removed by under reduced pressure, and 1 M HCl was added to the resulting yellow residue until the pH was between 2 and 3. The aqueous solution was extracted 3x with 25 mL of 30% EtOAc/hexanes, and the remaining aqueous layer was adjusted to pH 8-9 with a saturated aqueous sodium bicarbonate solution. The solution was extracted 3x with 30 mL of CH<sub>2</sub>Cl<sub>2</sub>. The resulting organic layers were combined, dried over sodium sulfate, and filtered. The solvent was removed under reduced pressure to afford the crude material, which was purified by column chromatography (the column was packed with 5% EtOAc, 5% triethylamine, and 90% hexanes and run on a gradient of 30% EtOAc/hexanes to 7:2:1 EtOAc: MeCN: MeOH) to yield 0.28 g (57%) of the title compound as a clear oil. <sup>1</sup>H NMR (500 MHz, CDCl<sub>3</sub>) δ 4.77 (td, *J* = 10.9, 4.4 Hz, 1H), 3.14 (s, 2H), 2.34 (s, 6H), 2.04 – 1.94 (m, 1H), 1.92 – 1.78 (m, 1H), 1.76 – 1.61 (m, 2H), 1.58 – 1.44 (m, 1H), 1.43 – 1.34 (m, 1H), 1.12 – 0.95 (m, 2H), 0.93 – 0.81 (m, 7H), 0.76 (d, *J* = 6.9 Hz, 3H); <sup>13</sup>C NMR (126 MHz, CDCl<sub>3</sub>) δ 170.2, 74.4, 60.8, 46.9, 45.3, 40.9, 34.2, 31.4, 26.3, 23.3, 22.0, 20.7, 16.2; HRMS (ESI) *m/z* calculated for [M+H]<sup>+</sup> 242.2115, found 242.2112.

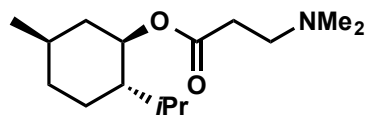

(-)-22

**(1R,2S,5R)-2-isopropyl-5-methylcyclohexyl 3-(dimethylamino)propanoate, (-)-22**

Following the procedure used to synthesize (1R,2S,5R)-2-isopropyl-5-methylcyclohexyl dimethylglycinate, (-)-menthol (0.31 g), 3-(N,N-dimethylamino)propionic acid•HCl (0.46 g), DCC (0.62 g), DMAP (0.37 g), and triethylamine (0.47 mL) was employed to give 0.096 g (19%) of the title compound as a clear oil after purification by column chromatography (SiO<sub>2</sub>, packed with 5% EtOAc, 5% triethylamine, and 90% hexanes and run on a gradient of 30% EtOAc/hexanes to 7:2:1 EtOAc: MeCN: MeOH). <sup>1</sup>H NMR (401 MHz, CDCl<sub>3</sub>) δ 4.69 (td, *J* = 10.9, 4.4 Hz, 1H), 2.83 – 2.70 (m, 2H), 2.67 – 2.51 (m, 2H), 2.36 (s, 6H), 2.03 – 1.92 (m, 1H), 1.92 – 1.78 (m, 1H), 1.75 – 1.61 (m, 2H), 1.56 – 1.42 (m, 1H), 1.42 – 1.30 (m, 1H), 1.13 – 0.93 (m, 2H), 0.93 – 0.79 (m, 8H), 0.75 (d, *J* = 7.0 Hz, 3H); <sup>13</sup>C NMR (126 MHz, CDCl<sub>3</sub>) δ 172.1, 74.2, 54.8, 47.0, 45.2, 40.9, 34.3, 33.3, 31.4, 26.2, 23.4, 22.0, 20.8, 16.3; HRMS (ESI) *m/z* calculated for [M+H]<sup>+</sup> 256.2271, found 256.2274.

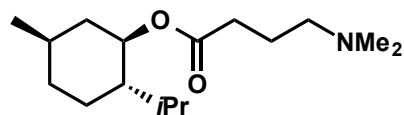

(-)-23

**(1R,2S,5R)-2-isopropyl-5-methylcyclohexyl 4-(dimethylamino)butanoate, (-)-23**

(-)-(*1R,2S,5R*)-menthol (200 mg, 1.28 mmol), 3-*N,N*-dimethylaminobutyric acid hydrochloride (325 mg, 1.92 mmol), triethylamine (304 μL, 2.18 mmol), DCC (400 mg, 1.92 mmol) and DMAP (237 mg, 1.92 mmol) were dissolved in 12.5 mL of CH<sub>2</sub>Cl<sub>2</sub> and stirred at rt for 4 d, then the reaction mixture was filtered through cotton and evaporated to dryness in vacuo. The crude residue was transferred to a separatory funnel by washing the flask with 0.1 M HCl and 30% EtOAc in hexanes. The acidified aqueous phase was extracted three times with 30% EtOAc in hexanes. Then, the aqueous layer was basified with saturated aqueous NaHCO<sub>3</sub> solution until it reached a pH of approximately 8-9, measured by pH paper. The aqueous layer was extracted three times with EtOAc. The EtOAc layers were combined, dried over anhydrous sodium sulfate, filtered, and evaporated to dryness in vacuo. The crude residue was chromatographed over silica gel (gradient from 30% EtOAc in hexanes to 20% MeCN, 10% MeOH in EtOAc) to yield 168 mg (49% yield) of the desired ester derivative as a colorless oil. <sup>1</sup>H NMR (400 MHz, CDCl<sub>3</sub>) δ 4.67 (ddd, *J* = 10.8, 10.8, 4.4 Hz, 2H), 2.35 – 2.24 (m, 4H), 2.22 (s, 6H), 2.06 – 1.93 (m, 1H), 1.91 – 1.74 (m, 3H), 1.72 – 1.62 (m, 2H), 1.54 – 1.42 (m, 1H), 1.41 – 1.31 (m, 1H), 1.11 – 0.80 (m, 9H), 0.75 (d, *J* = 6.8 Hz, 3H); <sup>13</sup>C NMR (175 MHz, CDCl<sub>3</sub>) δ 173.1, 74.0, 58.9, 47.0, 45.4, 40.9, 34.2, 32.4, 31.3, 26.2, 23.4, 23.1, 22.0, 20.7, 16.3; IR (thin film, cm<sup>-1</sup>) 2925, 2865, 2812, 2764, 1728, 1456; HRMS (ESI) *m/z* calculated for [M+H]<sup>+</sup> 270.2433, found 270.2431.

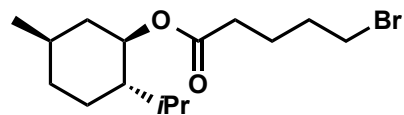

**(1R,2S,5R)-2-isopropyl-5-methylcyclohexyl 5-bromopentanoate, S1**

Following the procedure used to synthesize (1R,2S,5R)-2-isopropyl-5-methylcyclohexyl 6-bromohexanoate, (-)-menthol (0.23 g), DCC (0.46 g), DMAP (0.027 g), 5-bromovaleric acid (0.45 g),

and CH<sub>2</sub>Cl<sub>2</sub> (23 mL) were employed. 0.48 g of the title compound was obtained after purification by column chromatography (SiO<sub>2</sub>, 5% EtOAc/hexanes to 10% EtOAc/hexanes). <sup>1</sup>H NMR (400 MHz, CDCl<sub>3</sub>) δ 4.68 (td, *J* = 10.9, 4.4 Hz, 1H), 3.42 (t, *J* = 6.6 Hz, 2H), 2.32 (t, *J* = 7.2 Hz, 2H), 2.02 – 1.94 (m, 1H), 1.94 – 1.73 (m, 4H), 1.72 – 1.63 (m, 2H), 1.56 – 1.42 (m, 1H), 1.41 – 1.32 (m, 1H), 1.12 – 0.93 (m, 2H), 0.93 – 0.80 (m, 7H), 0.75 (d, *J* = 6.9 Hz, 3H); <sup>13</sup>C NMR (126 MHz, CDCl<sub>3</sub>) δ 172.6, 74.2, 47.0, 40.9, 34.2, 33.7, 33.0, 32.0, 31.4, 26.3, 23.6, 23.5, 23.4, 22.0, 20.7, 16.3; HRMS (ESI) *m/z* calculated for [M+Na]<sup>+</sup> 341.1087, found 341.1082.

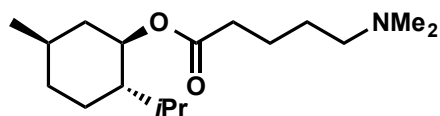

(-)-24

#### (1R,2S,5R)-2-isopropyl-5-methylcyclohexyl 5-(dimethylamino)pentanoate, (-)-24

Following the procedure to synthesize (1R,2S,5R)-2-isopropyl-5-methylcyclohexyl 6-(dimethylamino)hexanoate, (1R,2S,5R)-2-isopropyl-5-methylcyclohexyl 5-bromopentanoate (0.16 g), 40% w/w aqueous dimethylamine (0.32 mL) and DMF (2.2 mL) was employed to give 0.12 g (88%) of the desired product after purification by column chromatography (SiO<sub>2</sub>, 30% EtOAc/hexanes to 98%CH<sub>2</sub>Cl<sub>2</sub>, 2%, Et<sub>3</sub>N). <sup>1</sup>H NMR (400 MHz, CDCl<sub>3</sub>) δ 4.68 (td, *J* = 10.9, 4.4 Hz, 1H), 2.36 – 2.16 (m, 10H), 2.03 – 1.93 (m, 1H), 1.93 – 1.78 (m, 1H), 1.75 – 1.57 (m, 4H), 1.56 – 1.41 (m, 3H), 1.41 – 1.30 (m, 1H), 1.13 – 0.92 (m, 2H), 0.92 – 0.78 (m, 7H), 0.75 (d, *J* = 7.0 Hz, 3H); <sup>13</sup>C NMR (126 MHz, CDCl<sub>3</sub>) δ 173.1, 73.9, 59.4, 47.0, 45.5, 41.0, 34.6, 34.3, 31.4, 27.2, 26.3, 23.4, 23.0, 22.0, 20.8, 16.3; HRMS (ESI) *m/z* calculated for [M+H]<sup>+</sup> 284.2584, found 284.2595.

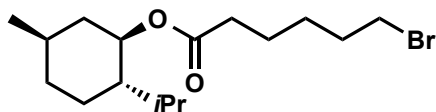

#### (1R,2S,5R)-2-isopropyl-5-methylcyclohexyl 6-bromohexanoate, S2

A flame-dried round-bottom flask was charged with 0.62 g of dicyclohexylcarbodiimide (DCC) (3.0 mmol), 0.037 g 4-dimethylaminopyridine (DMAP) (0.30 mmol), and 0.58 g of 6-bromohexanoic acid (3.0 equiv). The contents of the flask were suspended in 21 mL of CH<sub>2</sub>Cl<sub>2</sub>, and allowed to stir for 10 min. Then, 0.31 g of (-)-menthol (2.0 mmol) was added and the reaction was allowed to stir until all of the (-)-menthol was consumed as judged by TLC. The reaction mixture was filtered through a cotton plug and the solvent was removed under reduced pressure to afford a white residue. The crude material was purified by column chromatography (SiO<sub>2</sub>, gradient 5% EtOAc/hexanes to 10% EtOAc/hexanes) to yield 0.66 g (99%) of the title compound as a clear oil. <sup>1</sup>H NMR (401 MHz, CDCl<sub>3</sub>) δ 4.68 (td, *J* = 10.9, 4.4 Hz, 1H), 3.40 (t, *J* = 6.8 Hz, 2H), 2.30 (t, *J* = 7.4 Hz, 2H), 2.02 – 1.93 (m, 1H), 1.93 – 1.78 (m, 3H), 1.75 – 1.59 (m, 4H), 1.55 – 1.42 (m, 3H), 1.41 – 1.31 (m, 1H), 1.12 – 0.93 (m, 2H), 0.93 – 0.79 (m, 6H), 0.75 (d, *J* = 6.9 Hz, 3H); <sup>13</sup>C NMR (126 MHz, CDCl<sub>3</sub>) δ 173.0, 74.0, 47.0, 40.9, 34.4, 34.2, 33.5, 32.4, 31.4, 27.6, 26.3, 24.2, 23.4, 22.0, 20.8, 16.3; HRMS (ESI) *m/z* calculated for [M+Na]<sup>+</sup> 355.1243, found 355.1240.

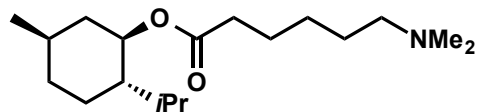

(-)-25

**(1R,2S,5R)-2-isopropyl-5-methylcyclohexyl 6-(dimethylamino)hexanoate, (-)-25**

A flame-dried round-bottom flask was charged with 0.16 g of (1R,2S,5R)-2-isopropyl-5-methylcyclohexyl 6-bromohexanoate (0.47 mmol). (1R,2S,5R)-2-isopropyl-5-methylcyclohexyl 6-bromohexanoate was suspended in 2.2 mL DMF and allowed to stir for ~5 min, followed by addition of 0.31 mL of 40% w/w aqueous dimethylamine (2.5 mmol). The mixture was stirred until all of the starting material was consumed as monitored by TLC analysis. The reaction was quenched with 6 mL of saturated sodium bicarbonate solution and extracted with EtOAc (3 x 15 mL). The resulting organic layers were combined, dried with sodium sulfate, filtered and concentrated under reduced pressure. The resulting clear oil was chromatographed (SiO<sub>2</sub>, 30% EtOAc/Hex to 99% CH<sub>2</sub>Cl<sub>2</sub>, 1% Et<sub>3</sub>N) to yield 0.13 g (90%) of the title compound as a clear oil. <sup>1</sup>H NMR (401 MHz, CDCl<sub>3</sub>) δ 4.67 (td, *J* = 10.9, 4.4 Hz, 1H), 2.34 – 2.15 (m, 10H), 2.02 – 1.93 (m, 1H), 1.93 – 1.77 (m, 1H), 1.75 – 1.58 (m, 4H), 1.48 (quint, *J* = 7.8 Hz, 3H), 1.41 – 1.26 (m, 3H), 1.15 – 0.93 (m, 2H), 0.93 – 0.79 (m, 7H), 0.75 (d, *J* = 6.9 Hz, 3H); <sup>13</sup>C NMR (126 MHz, CDCl<sub>3</sub>) δ 173.3, 73.9, 59.6, 47.0, 45.5, 40.9, 34.7, 34.3, 31.4, 27.4, 27.0, 26.2, 23.4, 22.0, 20.8, 16.3; HRMS (ESI) *m/z* calculated for [M+H]<sup>+</sup> 298.2741, found 298.2747.

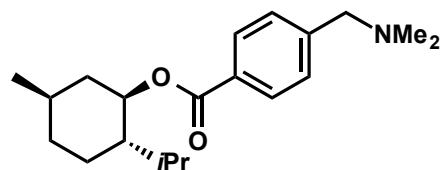

(-)-26

**(1R,2S,5R)-2-isopropyl-5-methylcyclohexyl 4-((dimethylamino)methyl)benzoate, (-)-26**

Following the procedure used to synthesize (1R,2S,5R)-2-isopropyl-5-methylcyclohexyl dimethylglycinate, (-)-(1R,2S,5R)-menthol (100 mg, 0.640 mmol), 172 mg of 4-((dimethylamino)methyl)benzoic acid (0.960 mmol, 1.50 equiv), 200 mg of dicyclohexylcarbodiimide (0.960 mmol, 1.5 equiv) and 118 mg 4-dimethylaminopyridine (0.960 mmol, 1.5 equiv) were employed to yield 166 mg (82%) of the desired ester derivative as a colorless oil after chromatography over silica gel (gradient from 30% EtOAc in hexanes to 100% EtOAc). <sup>1</sup>H NMR (700 MHz, CDCl<sub>3</sub>) δ 7.99 (d, *J* = 8.4 Hz, 2H), 7.38 (d, *J* = 8.4 Hz, 2H), 4.93 (ddd, *J* = 11.2, 11.2, 4.2 Hz, 1H), 3.47 (s, 2H), 2.25 (s, 6H), 2.12 (d, *J* = 11.9 Hz, 1H), 1.96 (sept-d, *J* = 7.0, 2.8 Hz, 1H), 1.75 – 1.70 (m, 2H), 1.61 – 1.53 (m, 2H), 1.14 (td, *J* = 13.7, 3.2 Hz, 1H), 1.09 (t, *J* = 12.0 Hz, 1H), 0.97 – 0.88 (m, 7H), 0.79 (d, *J* = 7.0 Hz, 3H); <sup>13</sup>C NMR (125 MHz, CDCl<sub>3</sub>) δ 166.0, 144.1, 129.6, 129.5, 128.8, 74.7, 64.0, 47.2, 45.3, 41.0, 34.3, 31.4, 26.5, 23.6, 22.0, 20.8, 16.5; IR (thin film, cm<sup>-1</sup>) 2923, 2856, 2767, 1712, 1611, 1454; HRMS (ESI) *m/z* calculated for [M+H]<sup>+</sup> 318.2433, found 318.2420.

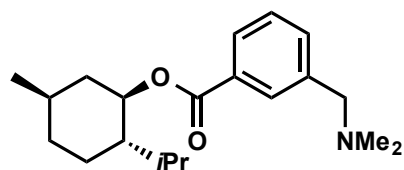

(-)-27

**(1R,2S,5R)-2-isopropyl-5-methylcyclohexyl 3-((dimethylamino)methyl)benzoate, (-)-27**

Following the procedure used to synthesize (1R,2S,5R)-2-isopropyl-5-methylcyclohexyl dimethylglycinate, (-)-(1R,2S,5R)-menthol (160 mg, 1.02 mmol), 154 mg of 3-((dimethylamino)methyl)benzoic acid (1.54 mmol, 1.50 equiv), 320 mg of dicyclohexylcarbodiimide (1.54 mmol, 1.50 equiv) and 190 mg 4-dimethylaminopyridine (1.54 mmol, 1.50 equiv) to yield 105 mg (33%) of the desired ester derivative as a colorless oil after chromatography over silica gel (gradient from 30% EtOAc in hexanes to 100% EtOAc). <sup>1</sup>H NMR (400 MHz, CDCl<sub>3</sub>) δ 7.97 – 7.92 (m, 2H), 7.52 (d, *J* = 7.5 Hz, 1H), 7.40 (d, *J* = 7.5 Hz, 2H), 4.94 (ddd, *J* = 11.0, 11.0, 4.5 Hz, 1H), 3.49 (d, *J* = 13.0 Hz, 1H), 3.45 (d, *J* = 13.0 Hz, 1H), 2.25 (s, 6H), 2.11 (dtd, *J* = 11.5, 3.5, 2.0 Hz, 1H), 1.96 (sept-d, *J* = 7.0, 2.5 Hz, 1H), 1.73 – 1.69 (m, 2H), 1.63 – 1.52 (m, 2H), 1.18 – 1.06 (m, 2H), 0.92 (t, *J* = 6.5 Hz, 6H), 0.79 (d, *J* = 7.5 Hz, 3H); <sup>13</sup>C NMR (175 MHz, CDCl<sub>3</sub>) δ 166.0, 139.2, 133.3, 130.8, 130.0, 128.3, 128.2, 74.7, 63.9, 47.1, 45.2, 40.9, 34.2, 31.4, 26.4, 23.6, 22.0, 20.7, 16.4; IR (thin film, cm<sup>-1</sup>) 2949, 2864, 2815, 2767, 1711, 1455, 1360; HRMS (ESI) *m/z* calculated for [M+H]<sup>+</sup> 318.2433, found 318.2440.

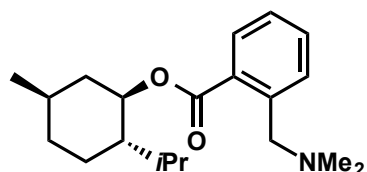

(-)-28

**(1R,2S,5R)-2-isopropyl-5-methylcyclohexyl 2-((dimethylamino)methyl)benzoate, (-)-28**

2-((dimethylamino)methyl)benzoic acid (57 mg, 0.32 mmol) was dissolved in 1 mL CH<sub>2</sub>Cl<sub>2</sub>. To this mixture was added one drop of *N,N*-dimethylformamide followed by oxalyl chloride (33 μL, 0.38 mmol). The reaction was allowed to stir at rt for 1.5 h before the solvent was evaporated and the crude acid chloride was resuspended in 1 mL CH<sub>2</sub>Cl<sub>2</sub>. The acyl chloride suspension was added dropwise to an ice cooled solution of (-)-(1R,2S,5R)-menthol (100 mg, 0.64 mmol), DMAP (0.16 mmol, 20 mg) and triethylamine (180 μL, 1.3 mmol) in 3.4 mL CH<sub>2</sub>Cl<sub>2</sub>. The reaction mixture was allowed to stir as it was warmed to rt. After 12 h, the reaction was quenched by the addition of saturated sodium bicarbonate solution. The aqueous phase was washed with EtOAc (3x), dried over sodium sulfate, filtered and concentrated. The crude residue was transferred to a separatory funnel by washing the flask with 0.1 M HCl and 30% EtOAc in hexanes. The acidified aqueous phase was extracted three times with 30% EtOAc in hexanes. Then, the aqueous layer was basified with saturated aqueous NaHCO<sub>3</sub> solution until it reached a pH of approximately 8-9, measured by pH paper. The basic aqueous layer was extracted three times with EtOAc. The EtOAc organic layers were combined, dried over anhydrous sodium sulfate, filtered, and evaporated to dryness in vacuo. The crude residue was chromatographed over silica gel (gradient from 5% EtOAc in hexanes to 100% EtOAc) to yield 44 mg (44%) of the desired ester as a colorless oil. <sup>1</sup>H NMR (500 MHz, CDCl<sub>3</sub>) δ 7.70 (d, *J* = 8.0 Hz, 1H), 7.48 (d, *J* = 7.5 Hz, 1H), 7.42 (t, *J* = 7.5 Hz, 1H), 7.29 (t, *J* = 7.5 Hz, 1H), 4.91 (ddd, *J* = 11.0, 11.0, 4.5 Hz, 1H), 3.80 (d, *J* = 14.0 Hz, 1H), 3.65 (d, *J* = 13.5 Hz, 1H), 2.22 (s, 6H), 2.17 (d, *J* = 11.5 Hz, 1H), 2.02 (sept-d, *J* = 7.0, 2.5 Hz, 1H), 1.77 – 1.69 (m, 2H), 1.62 – 1.47 (m, 2H), 1.18 – 1.05 (m, 2H), 0.98 – 0.86 (m, 7H), 0.82 (d, 6.5 Hz, 3H);

$^{13}\text{C}$  NMR (175 MHz,  $\text{CDCl}_3$ )  $\delta$  167.8, 139.9, 132.0, 130.8, 130.0, 129.3, 126.6, 76.8, 74.6, 61.2, 47.2, 45.2, 40.9, 34.2, 31.4, 26.2, 23.4, 22.1, 20.8, 16.3; IR (thin film,  $\text{cm}^{-1}$ ) 2951, 2868, 2815, 2765, 1715, 1454, 1366; HRMS (ESI)  $m/z$  calculated for  $[\text{M}+\text{H}]^+$  318.2433, found 318.2436.

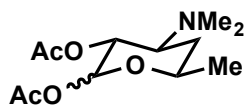

**(3R,4S,6R)-4-(dimethylamino)-6-methyltetrahydro-2H-pyran-2,3-diyl diacetate, S3**

Following the literature procedure (5), 7.0 g (9.5 mmol) of erythromycin was added to a round bottom flask followed by 50 mL of EtOH. 125 mL of a 6 N HCl solution was added, and the mixture was heated at reflux at 100 °C for 4 h. The reaction mixture was transferred to a separatory funnel and extracted with  $\text{CHCl}_3$  (3 x 50 mL). The organic layer was discarded, and the solvent was removed from the red/orange aqueous layer. After vacuum drying overnight, crude 4-(dimethylamino)-6-methyltetrahydro-2H-pyran-2,3-diol was obtained as a red/orange solid and was carried on to the next step without further purification. The crude compound was transferred to a round bottom flask and suspended in 50 mL  $\text{Ac}_2\text{O}$ . 2 mL of concentrated sulfuric acid was added at 0 °C. The resulting mixture was stirred overnight at rt. The reaction mixture was poured into ice water and neutralized with solid sodium bicarbonate and extracted with EtOAc. The combined organic layers were concentrated and purified by column chromatography (80% EtOAc 20% Hexanes to 2% MeOH in EtOAc) to afford 4-(dimethylamino)-6-methyltetrahydro-2H-pyran-2,3-diyl diacetate (1.5 g, 5.7 mmol, 60 % over 2 steps) as a yellow oil. Spectral data of the compound was identical with that previously reported (5).

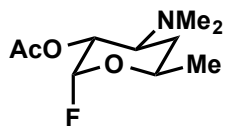

**(2R,3R,4S,6R)-4-(dimethylamino)-2-fluoro-6-methyltetrahydro-2H-pyran-3-yl acetate, S4**

To a stirring solution of HF pyridine (7.2 mL) in a dry polyethylene vial at 0 °C was added 1.2 g (4.4 mmol) of 4-(dimethylamino)-6-methyltetrahydro-2H-pyran-2,3-diyl diacetate as a solution in toluene (4.8 mL). The reaction was allowed to stir at 0 °C for 2.5 h. The reaction mixture was diluted with 10 mL of a brine solution and quenched with a saturated sodium bicarbonate solution. The mixture was extracted with EtOAc and dried over  $\text{Na}_2\text{SO}_4$ , filtered, and concentrated. The crude material was chromatographed (100% EtOAc) to yield 0.48 g (2.2 mmol) of the  $\alpha$ -anomer of 4-(dimethylamino)-2-fluoro-6-methyltetrahydro-2H-pyran-3-yl acetate as a clear oil. Spectral data of the compound was identical with that previously reported (5).

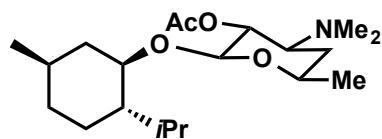

**(2S,3R,4S,6R)-4-(dimethylamino)-2-(((1R,2S,5R)-2-isopropyl-5-methylcyclohexyl)oxy)-6-methyltetrahydro-2H-pyran-3-yl acetate, S5**

A suspension of (-)-menthol (0.038 g, 0.24 mmol), 4-(dimethylamino)-2-fluoro-6-methyltetrahydro-2H-pyran-3-yl acetate (0.026 g, 0.12 mmol), and molecular sieves (4Å, 0.15 g) in 2 mL  $\text{CH}_2\text{Cl}_2$  was allowed to stir for 30 min at rt under an  $\text{N}_2$  atmosphere. The suspension was cooled to 0 °C and  $\text{BF}_3 \cdot \text{OEt}_2$  0.060 mL (0.48 mmol, freshly distilled) was added. The reaction was allowed to stir at 0 °C until the starting material was consumed as judged by TLC. The reaction was quenched with a solution of saturated

sodium bicarbonate and extracted with EtOAc. The resulting organic layers were combined, dried over Na<sub>2</sub>SO<sub>4</sub>, filtered, concentrated, and purified by chromatography (5% MeOH in CH<sub>2</sub>Cl<sub>2</sub>) to yield 0.028 g (65%) of the title compound as a clear oil. <sup>1</sup>H NMR (401 MHz, CDCl<sub>3</sub>) δ 4.77 (dd, *J* = 10.5, 7.6 Hz, 1H), 4.32 (d, *J* = 7.6 Hz, 1H), 3.63 – 3.42 (m, 1H), 3.32 (td, 1H), 2.77 (s, 1H), 2.41 – 2.18 (m, 7H), 2.06 (s, 3H), 2.01 – 1.91 (m, 1H), 1.80 – 1.69 (m, 1H), 1.69 – 1.55 (m, 2H), 1.45 – 1.13 (m, 8H), 1.03 – 0.77 (m, 9H), 0.74 (d, *J* = 6.9 Hz, 3H).

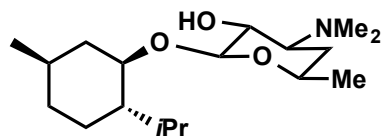

**(2S,3R,4S,6R)-4-(dimethylamino)-2-(((1R,2S,5R)-2-isopropyl-5-methylcyclohexyl)oxy)-6-methyltetrahydro-2H-pyran-3-ol, S6**

To a solution of 2-((1R,2S,5R)-(-)-menthol)-4-(dimethylamino)-6-methyltetrahydro-2H-pyran-3-yl acetate 0.028 g (0.079 mmol) in 1.60 mL of MeOH was added 0.044 g of K<sub>2</sub>CO<sub>3</sub> (0.32 mmol). The reaction was allowed to stir at rt until all starting material was consumed as judged by TLC. The reaction was diluted with brine and extracted with EtOAc. The organic layers were combined, dried over Na<sub>2</sub>SO<sub>4</sub>, concentrated, and purified by chromatography (10% MeOH in CH<sub>2</sub>Cl<sub>2</sub>) to yield 0.023g (95%) of the title compound. <sup>1</sup>H NMR (401 MHz, CDCl<sub>3</sub>) δ 4.29 (d, *J* = 7.3 Hz, 1H), 3.59 – 3.39 (m, 2H), 3.27 (dd, *J* = 10.2, 7.3 Hz, 1H), 2.63 (ddd, *J* = 12.3, 10.2, 4.1 Hz, 1H), 2.35 (s, 7H), 2.14 – 2.00 (m, 1H), 1.84 – 1.70 (m, 1H), 1.70 – 1.56 (m, 2H), 1.36 – 1.20 (m, 7H), 1.03 – 0.80 (m, 9H), 0.76 (d, *J* = 6.9 Hz, 3H); <sup>13</sup>C NMR (126 MHz, CDCl<sub>3</sub>) δ 101.0, 76.6, 69.6, 69.1, 65.3, 47.6, 40.7, 40.3, 34.3, 31.5, 29.4, 24.9, 22.9, 22.1, 21.0, 20.9, 15.3; HRMS (ESI) *m/z* calculated for [M+H]<sup>+</sup> 314.2690, found 314.2696.

**Synthesis of (+)-menthol derivatives:** The parallel set of (+)-menthol substrates were synthesized in an analogous manner to yield products matching the characterization data for the (-)-menthol enantiomer.

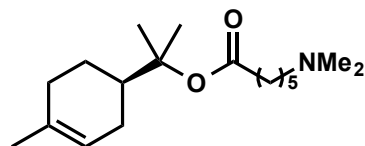

**(R)-2-(4-methylcyclohex-3-en-1-yl)propan-2-yl 6-(dimethylamino)hexanoate, S7**

A flame-dried round bottom flask was charged with 0.771 g (5.00 mmol) of (+)- $\alpha$ -terpineol, 1.545 g (7.50 mmol) of DCC, and 0.122 g (1.00 mmol) of DMAP. The contents of the flask were suspended in 25 mL of DCM and allowed to stir for 5 minutes before 1.460 g (7.50 mmol) of 6-bromohexanoic acid. Upon completion, the reaction was filtered through a plug of cotton and the solvent removed. The crude material was purified by chromatography to yield the ester.

A round bottom flask was charged with 0.404 g (1.22 mmol) of the ester. The contents of the flask were suspended in DMF and cooled to 0 °C. 0.289 g (6.42 mmol) of dimethylamine solution (40 wt. % in H<sub>2</sub>O) was then added. Upon completion, the reaction was quenched with ethyl acetate and a solution of sat'd sodium bicarbonate. The organic layer was extracted twice with a solution of sat'd sodium bicarbonate and once with a solution of brine. The solvent was removed from the organic layer and the resulting residue was suspended in 1 M HCl until pH ~2. The aqueous layer was extracted three times with diethyl ether and then basified to pH ~8 with a solution of sat'd sodium bicarbonate. The aqueous

solution was extracted thrice with DCM, the organic layers combined, dried over sodium sulfate, and the solvent removed to yield 0.292 g (81%) of the desired product.  $^1\text{H}$  NMR (400 MHz,  $\text{CDCl}_3$ ):  $\delta$  5.38-5.32 (m, 1H), 2.29-2.16 (m, 11H), 2.07-1.92 (m, 4H), 1.85-1.73 (m, 2H), 1.63-1.54 (m, 4H), 1.52-1.45 (m, 2H), 1.42 (s, 3H), 1.40 (s, 3H), 1.35-1.25 (m, 3H);  $^{13}\text{C}$  NMR (100 MHz,  $\text{CDCl}_3$ ):  $\delta$  173.0, 133.9, 120.283, 84.6, 59.6, 45.4 (2C), 42.7, 35.6, 30.9, 27.3, 26.9, 26.3, 25.0, 23.8, 23.3, 23.3, 23.1; HRMS (ESI)  $m/z$  calculated for  $[\text{M}+\text{H}]^+$  296.2584, found 296.2582.

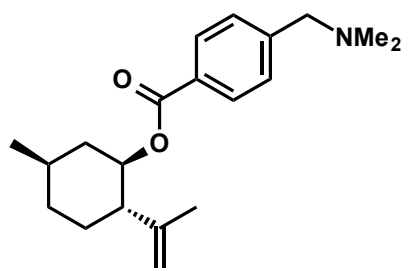

**(1R,2S,5R)-5-methyl-2-(prop-1-en-2-yl)cyclohexyl 4-((dimethylamino)methyl)benzoate, S8**

A flame-dried round bottom flask was charged with 0.462 g (3.00 mmol) of (-)-Isopulegol, 0.927 g (4.50 mmol) of DCC, and 0.073 g (0.60 mmol) of DMAP. The contents of the flask were suspended in 15 mL of DCM and allowed to stir for 5 minutes before 0.675 g (4.50 mmol) of 4-formylbenzoic acid. Upon completion, the reaction was filtered through a plug of cotton and the solvent removed. The crude material was purified by chromatography to yield the ester.

A flame-dried round bottom flask was charged with 0.772 g (2.70 mmol) of the ester and 0.284 g (3.51 mmol) of dimethylamine hydrochloride. The contents of the flask were suspended in DCM and cooled to 0 °C. 0.859 g (4.05 mmol) of sodium triacetoxyborohydride was then added over half an hour. Upon completion, the reaction was quenched with ethyl acetate and a solution of sat'd sodium bicarbonate. The organic layer was extracted twice with a solution of sat'd sodium bicarbonate and once with a solution of brine. The solvent was removed from the organic layer and the resulting residue was suspended in 1 M HCl until pH ~2. The aqueous layer was extracted three times with diethyl ether and then basified to pH ~8 with a solution of sat'd sodium bicarbonate. The aqueous solution was extracted thrice with DCM, the organic layers combined, dried over sodium sulfate, and the solvent removed to yield 0.587 g (69%) of the desired product.  $^1\text{H}$  NMR (400 MHz,  $\text{CDCl}_3$ ):  $\delta$  7.94 (d,  $J$  = 8.0 Hz, 2H), 7.36 (d,  $J$  = 8.0 Hz, 2H), 5.01 (td,  $J$  = 10.9, 4.4 Hz, 1H), 4.78-4.75 (m, 1H), 4.71-4.67 (m, 1H), 3.47 (s, 2H), 2.33-2.20 (m, 7H), 2.19-2.11 (m, 1H), 1.90-1.55 (m, 6H), 1.53-1.40 (m, 1H), 1.13 (q,  $J$  = 11.8 Hz, 1H), 1.07-0.97 (m, 1H), 0.95 (d,  $J$  = 6.5 Hz, 3H);  $^{13}\text{C}$  NMR (100 MHz,  $\text{CDCl}_3$ ):  $\delta$  165.9, 146.1, 143.7, 129.7, 129.6, 128.8, 111.9, 74.2, 64.0, 50.9, 45.4 (2C), 40.5, 34.2, 31.4, 30.5, 22.0, 19.5; HRMS (ESI)  $m/z$  calculated for  $[\text{M}+\text{H}]^+$  316.2271, found 316.2276.

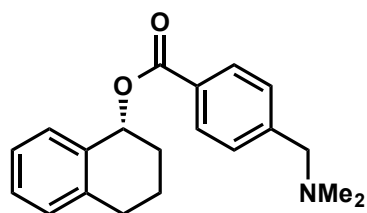

**(R)-1,2,3,4-tetrahydronaphthalen-1-yl 4-((dimethylamino)methyl)benzoate, S9**

A flame-dried round bottom flask was charged with 0.217 g (1.46 mmol) of (R)-1,2,3,4-tetrahydronaphthalen-1-ol, 0.453 g (2.20 mmol) of DCC, and 0.036 g (0.29 mmol) of DMAP. The



contents of the flask were suspended in 10 mL of DCM and allowed to stir for 5 minutes before 0.330 g (2.20 mmol) of 4-formylbenzoic acid. Upon completion, the reaction was filtered through a plug of cotton and the solvent removed. The crude material was purified by chromatography to yield the ester.

A flame-dried round bottom flask was charged with 0.381 g (1.40 mmol) of the ester and 0.143 g (1.78 mmol) of dimethylamine hydrochloride. The contents of the flask were suspended in DCM and cooled to 0 °C. 0.445 g (2.10 mmol) of sodium triacetoxyborohydride was then added over half an hour. Upon completion, the reaction was quenched with ethyl acetate and a solution of sat'd sodium bicarbonate. The organic layer was extracted twice with a solution of sat'd sodium bicarbonate and once with a solution of brine. The solvent was removed from the organic layer and the resulting residue was suspended in 1 M HCl until pH ~2. The aqueous layer was extracted three times with diethyl ether and then basified to pH ~8 with a solution of sat'd sodium bicarbonate. The aqueous solution was extracted thrice with DCM, the organic layers combined, dried over sodium sulfate, and the solvent removed to yield 0.333 g (77%) of the desired product. <sup>1</sup>H NMR (400 MHz, CDCl<sub>3</sub>) δ 7.99 (d, *J* = 8.2 Hz, 2H), 7.40 – 7.31 (m, 3H), 7.29 – 7.20 (m, 1H), 7.16 (m, 2H), 6.23 (t, *J* = 4.5 Hz, 1H), 3.45 (s, 2H), 2.96 – 2.86 (m, 1H), 2.85 – 2.74 (m, 1H), 2.22 (s, 6H), 2.15 – 1.98 (m, 3H), 1.87 (m, 1H); <sup>13</sup>C NMR (100 MHz, CDCl<sub>3</sub>) δ 166.2, 144.1, 138.0, 134.7, 129.7, 129.5, 129.5, 129.0, 128.8, 128.0, 126.0, 70.5, 64.0, 45.4, 29.2, 29.0, 19.1; HRMS (ESI) *m/z* calculated for [M+H]<sup>+</sup> 310.1802, found 310.1808.

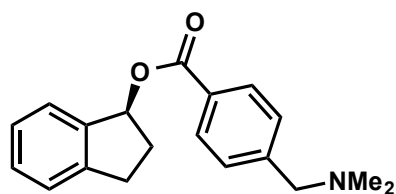

**(S)-2,3-dihydro-1H-inden-1-yl 4-((dimethylamino)methyl)benzoate, S10**

A flame-dried round bottom flask was charged with 0.200 g (1.50 mmol) of (S)-2,3-dihydro-1H-inden-1-ol, 0.464 g (2.25 mmol) of DCC, and 0.027 g (0.225 mmol) of DMAP. The contents of the flask were suspended in 16 mL of DCM and allowed to stir for 5 minutes before 0.338 g (2.25 mmol) of 4-formylbenzoic acid. Upon completion, the reaction was filtered through a plug of cotton and the solvent removed. The crude material was purified by chromatography (Hexanes to 20% ethyl acetate in hexanes) to yield 0.323 g (81%) of the desired product. <sup>1</sup>H NMR (700 MHz, CDCl<sub>3</sub>) δ 10.09 (s, 1H), 8.19 (d, *J* = 8.4 Hz, 2H), 7.93 (d, *J* = 8.4 Hz, 2H), 7.50 (d, *J* = 7.5 Hz, 1H), 7.36 – 7.31 (m, 2H), 7.29 – 7.23 (m, 1H), 6.48 (dd, *J* = 7.1, 3.8 Hz, 1H), 3.21 (ddd, *J* = 15.3, 8.4, 6.2 Hz, 1H), 2.97 (ddd, *J* = 16.0, 8.6, 4.9 Hz, 1H), 2.69 – 2.61 (m, 1H), 2.31 – 2.23 (m, 1H); <sup>13</sup>C NMR (176 MHz, CDCl<sub>3</sub>) δ 191.6, 165.5, 144.5, 140.7, 139.1, 135.5, 130.3, 129.4, 129.2, 126.8, 125.7, 124.9, 79.7, 32.4, 30.3; IR (thin film, cm<sup>-1</sup>) 2933, 2841, 1709, 1264.

A flame-dried round bottom flask was charged with 0.283 g (1.06 mmol) of (S)-2,3-dihydro-1H-inden-1-yl 4-formylbenzoate and 0.112 g (1.38 mmol) of dimethylamine hydrochloride. The contents of the flask were suspended in DCM and cooled to 0 °C. 0.337 g (1.59 mmol) of sodium triacetoxyborohydride was then added over half an hour. Upon completion, the reaction was quenched with ethyl acetate and a solution of sat'd sodium bicarbonate. The organic layer was extracted twice with a solution of sat'd sodium bicarbonate and once with a solution of brine. The solvent was removed from the organic layer and the resulting residue was suspended in 1 M HCl until pH ~2. The aqueous layer was extracted three times with diethyl ether and then basified to pH ~8 with a solution of sat'd sodium bicarbonate. The aqueous solution was extracted thrice with DCM, the organic layers

combined, dried over sodium sulfate, and the solvent removed to yield 0.232 g (74%) of the desired product.  $^1\text{H}$  NMR (500 MHz,  $\text{CDCl}_3$ )  $\delta$  8.03 – 7.96 (m, 2H), 7.49 (d,  $J = 7.5$  Hz, 1H), 7.36 (d,  $J = 8.0$  Hz, 2H), 7.33 – 7.30 (m, 2H), 7.28 – 7.21 (m, 1H), 6.45 (dd,  $J = 7.1, 4.1$  Hz, 1H), 3.46 (s, 2H), 3.18 (ddd,  $J = 15.9, 8.5, 5.9$  Hz, 1H), 2.95 (ddd,  $J = 16.0, 8.6, 5.2$  Hz, 1H), 2.68 – 2.59 (m, 1H), 2.28 – 2.19 (m, 7H);  $^{13}\text{C}$  NMR (176 MHz,  $\text{CDCl}_3$ )  $\delta$  166.5, 144.4, 144.3, 141.2, 129.7, 129.3, 128.9, 128.8, 126.7, 125.7, 124.8, 78.8, 64.0, 45.4, 32.5, 30.3; IR (thin film,  $\text{cm}^{-1}$ ) 2941, 2878, 2816, 2767, 1711, 1456, 1264; HRMS (ESI)  $m/z$  calculated for  $[\text{M}+\text{H}]^+$  296.1645, found 296.1646.

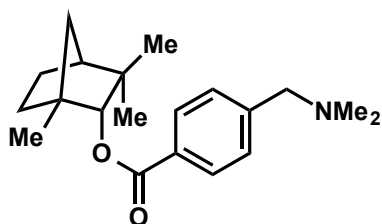

**(1R,2R,4S)-1,3,3-trimethylbicyclo[2.2.1]heptan-2-yl 4-((dimethylamino)methyl)benzoate, S11**

A flame-dried round bottom flask was charged with 1.000 g (6.50 mmol) of (+)-fenchol, 2.060 g (10.0 mmol) of DCC, and 0.159 g (1.30 mmol) of DMAP. The contents of the flask were suspended in 30 mL of DCM and allowed to stir for 5 minutes before 1.500 g (10.00 mmol) of 4-formylbenzoic acid. Upon completion, the reaction was filtered through a plug of cotton and the solvent removed. The crude material was purified by chromatography to yield the ester.

A flame-dried round bottom flask was charged with 0.530 g (1.85 mmol) of the ester and 0.195 g (2.41 mmol) of dimethylamine hydrochloride. The contents of the flask were suspended in DCM and cooled to 0 °C. 0.588 g (2.78 mmol) of sodium triacetoxyborohydride was then added over half an hour. Upon completion, the reaction was quenched with ethyl acetate and a solution of sat'd sodium bicarbonate. The organic layer was extracted twice with a solution of sat'd sodium bicarbonate and once with a solution of brine. The solvent was removed from the organic layer and the resulting residue was suspended in 1 M HCl until pH ~2. The aqueous layer was extracted three times with diethyl ether and then basified to pH ~8 with a solution of sat'd sodium bicarbonate. The aqueous solution was extracted thrice with DCM, the organic layers combined, dried over sodium sulfate, and the solvent removed to yield 0.414 g (71%) of the desired product.  $^1\text{H}$  NMR (400 MHz,  $\text{CDCl}_3$ )  $\delta$  8.01 (d,  $J = 8.1$  Hz, 2H), 7.40 (d,  $J = 8.1$  Hz, 2H), 4.62 (s, 1H), 3.48 (s, 2H), 2.26 (s, 6H), 1.99 – 1.88 (m, 1H), 1.77 (d,  $J = 9.0$  Hz, 2H), 1.67 (d,  $J = 11.7$  Hz, 1H), 1.49 (s, 1H), 1.27 (s, 2H), 1.18 (s, 3H), 1.11 (s, 3H), 0.84 (s, 3H);  $^{13}\text{C}$  NMR (126 MHz,  $\text{CDCl}_3$ )  $\delta$  166.8, 129.5, 128.9, 86.6, 64.0, 48.6, 48.4, 45.4, 41.5, 39.8, 29.8, 26.9, 25.9, 20.3, 19.5; HRMS (ESI)  $m/z$  calculated for  $[\text{M}+\text{H}]^+$  316.2271, found 316.2268.

---

### III. Biochemistry

**Preparation of PikC(D50ND176QE246A)-RhFRED:** Using previously prepared pET28b-PikC(D50N)-RhFRED as a template, iterative site-directed mutagenesis was performed with the primers: (D176Q) 5'-ccgccttccgcgtctggaccCAGgccttctcttcccggacgac-3' and (E246A) 5'-catcctgctcgtcgcggggcacGCCaccaggtcaatctgatcgccaacgg-3'.

**Expression and purification of PikC-RhFRED variants:** Protein expression and purification followed a previously described procedure (6).

**PikC<sub>xx</sub>-RhFRED analytical-scale enzymatic reactions:** The standard assay contained 5  $\mu$ M PikC<sub>xx</sub>-RhFRED, 1 mM substrate, 1 mM NADP<sup>+</sup>, 0.05 units of glucose-6-phosphate dehydrogenase, and 5 mM glucose-6-phosphate for NADPH regeneration in of reaction buffer (50 mM NaH<sub>2</sub>PO<sub>4</sub>, pH 7.3, 1 mM EDTA, 0.2 mM dithioerythritol, and 10% glycerol) total volume 50  $\mu$ L. The reaction was carried out at 30 °C for 3 h and quenched by addition of 150  $\mu$ L MeOH. The resulting mixture was briefly vortexed and centrifuged at 10,000 x g for 10 min. The subsequent liquid chromatography mass spectrometry (LC-MS) analysis was performed on an Agilent Q-TOF HPLC-MS (Department of Chemistry, University of Michigan) equipped with an high resolution electrospray mass spectrometry (ESI-MS) source and a Beckmann Coulter reverse-phase HPLC system using an Waters XBridge C18 3.5  $\mu$ m, 2.1x150 mm under the following conditions: mobile phase (A = deionized water + 0.1% formic acid, B = acetonitrile + 0.1% formic acid), 10% to 100% B over 15 min, 100% B for 4 min; flow rate, 0.2 mL/min. Reactions were scanned for [M+16] (monohydroxylation) and [M+32] (dihydroxylation). The percent conversion was determined as outlined in Li et al. (7). Briefly, the percent conversion was calculated with  $AUC_{\text{total products}}/(AUC_{\text{total products}} + AUC_{\text{unreacted substrate}})$  by assuming ionization efficiency of substrate and hydroxylated products are the same, because the ionization site of this series of compounds should be the dimethylamino group (7).

**Determination of total turnover number (TTN):** Total turnover number was determined by analyzing (# of moles of starting material consumed)/(# of moles of enzyme) under the following conditions: 5  $\mu$ M PikC<sub>D50N</sub>-RhFRED, 1 mM substrate, 1 mM NADP<sup>+</sup>, 0.05 units of glucose-6-phosphate dehydrogenase, and 5 mM glucose-6-phosphate for NADPH regeneration in 50  $\mu$ L of reaction buffer (50 mM NaH<sub>2</sub>PO<sub>4</sub>, pH 7.3, 1 mM EDTA, 0.2 mM dithioerythritol, and 10% glycerol). The reaction was carried out at 30 °C for 24 h and quenched by addition of 150  $\mu$ L MeOH. The resulting mixture was briefly vortexed and centrifuged at 10,000 x g for 10 min. The subsequent liquid chromatography mass spectrometry (LC-MS) analysis was performed on an Agilent Q-TOF HPLC-MS (Department of Chemistry, University of Michigan) equipped with an high resolution electrospray mass spectrometry (ESI-MS) source and a Beckmann Coulter reverse-phase HPLC system using an Waters XBridge C18 3.5  $\mu$ m, 2.1x150 mm under the following conditions: mobile phase (A = deionized water + 0.1% formic acid, B = acetonitrile + 0.1% formic acid), 10% to 100% B over 15 min, 100% B for 4 min; flow rate, 0.2 mL/min. Assuming equal ionization efficiencies of the starting material and product, the percent conversion of the reaction was calculated with  $AUC_{\text{total products}}/(AUC_{\text{total products}} + AUC_{\text{unreacted substrate}})$  (7). All reactions were performed and analyzed in triplicate.

---

**PikC<sub>D50N</sub>-RhFRED preparative-scale enzymatic reactions:**

Preparative –scale enzymatic reactions were conducted on 20 mg of each substrate under the following conditions: 5  $\mu$ M PikC<sub>D50N</sub>-RhFRED, 1 mM substrate, 1 mM NADP<sup>+</sup>, 1 U/mL glucose-6-phosphate dehydrogenase, and 5 mM glucose-6-phosphate for NADPH generation in reaction buffer (50 mM NaH<sub>2</sub>PO<sub>4</sub>, pH 7.3, 1 mM EDTA, 0.2 mM dithoerythritol, and 10% glycerol). The reaction mixture was divided into 50 mL conical tubes in 7 mL aliquots. Each conical tube was loosely capped and transferred to a shaking incubator. The reaction was carried out at 30 °C for 12 h at 160 rpm. After 12 h, a 50  $\mu$ L aliquot was removed and processed in an identical manner to the analytical-scale reactions described above to access the outcome of the reaction. The remaining reaction mixture was diluted with acetone (2 x total reaction volume) and cooled to 4 °C for two h. The mixture was then filtered through celite and concentrated under reduced pressure until the acetone had been removed. The remaining solution was adjusted to pH 12, brined and extracted with EtOAc (3 x 200 mL). The organic layers were combined, dried over Na<sub>2</sub>SO<sub>4</sub> and concentrated to afford a crude yellow oil. The crude oil was purified through silica flash column chromatography (column conditions from the starting material purification) to afford the mixture of hydroxylated products.

**Supplementary Figure S15: Hydroxylation of (-)-21 by PikC-RhFRED variants, LC-MS traces and HRMS of the starting material (A) and product (B).**

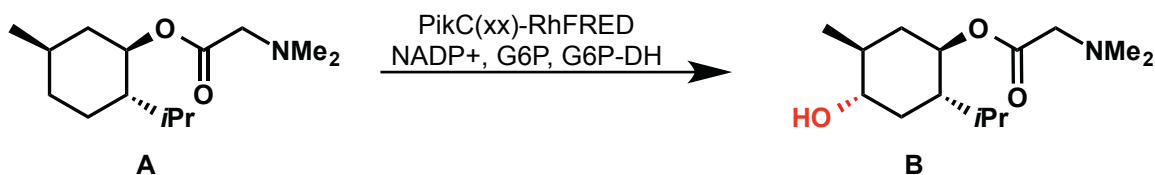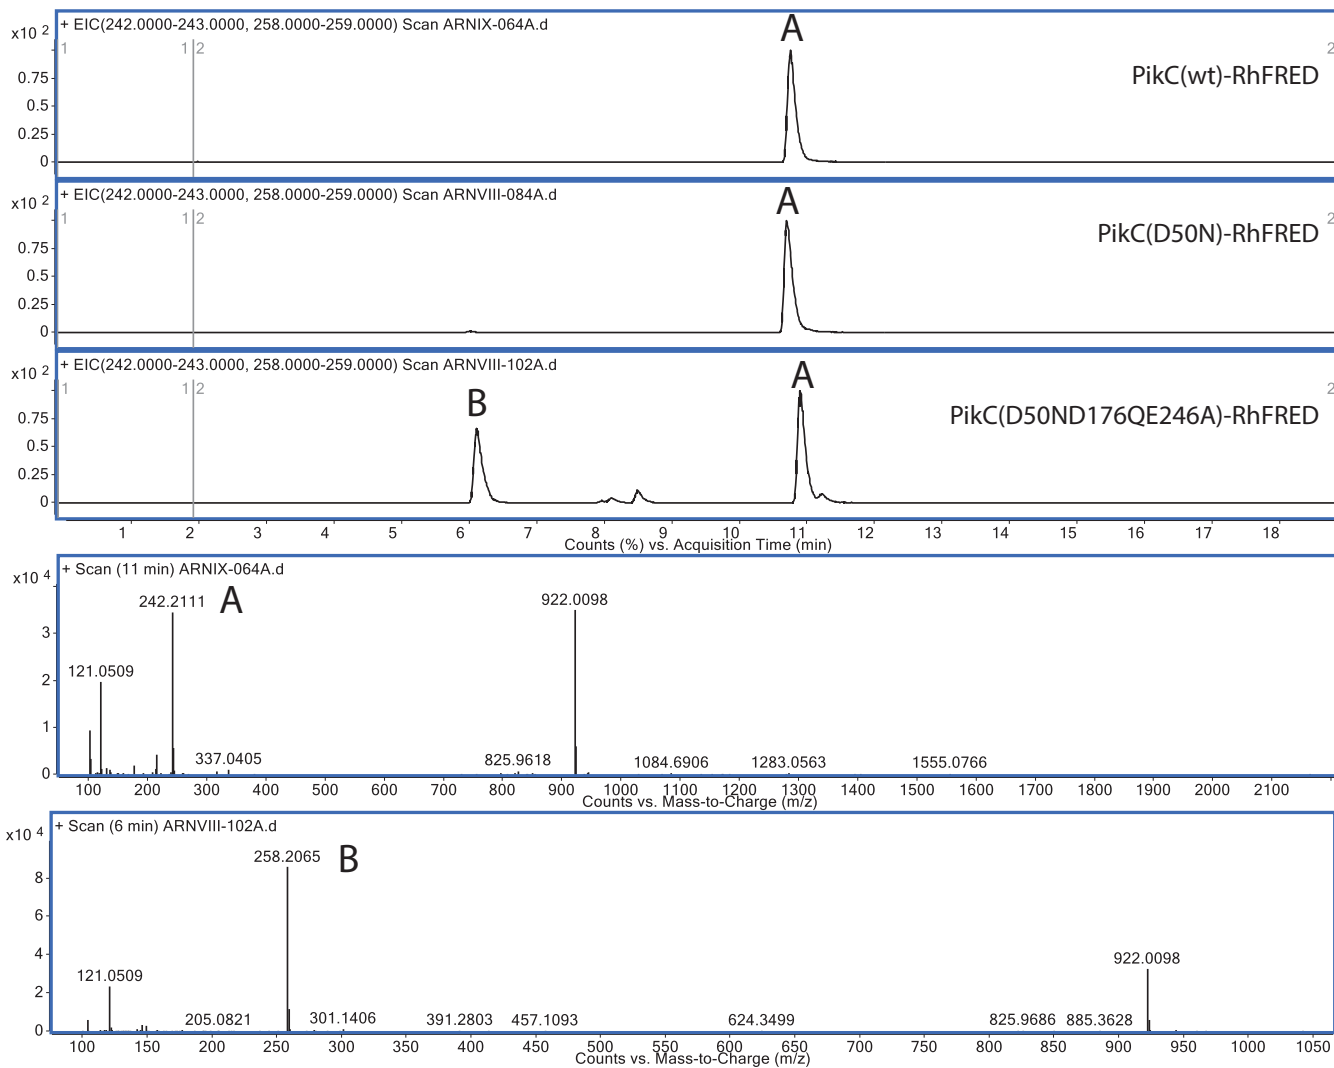

**Supplementary Figure S16: Hydroxylation of (-)-22 by PikC-RhFRED variants, LC-MS traces and HRMS of the starting material (A) and product (B).**

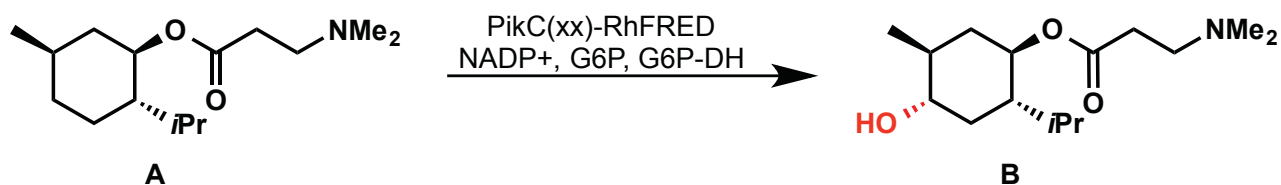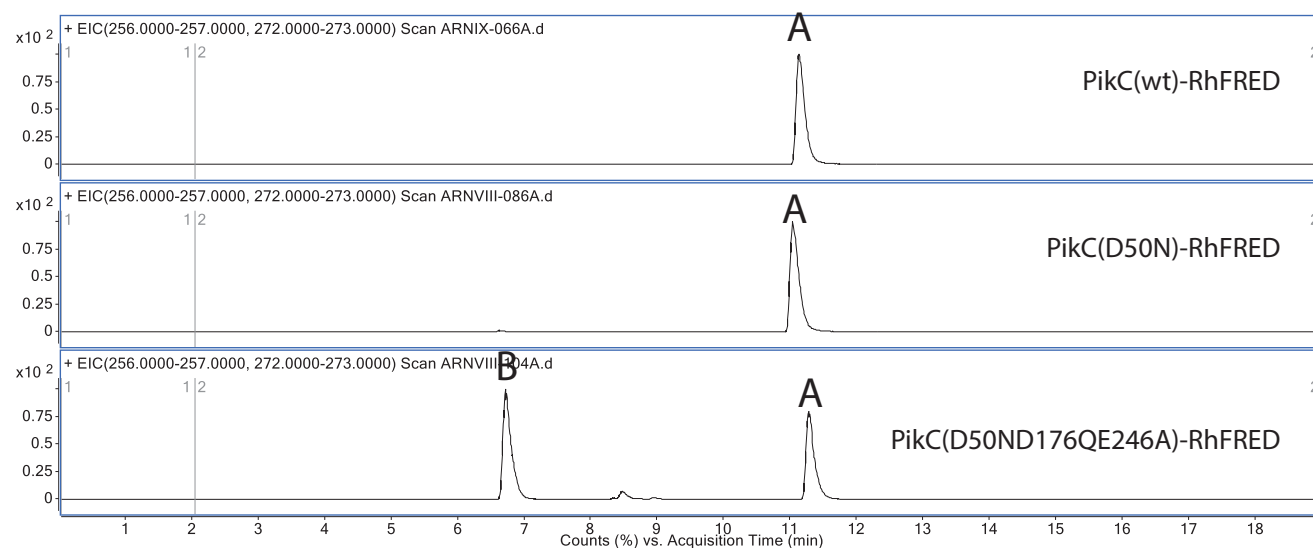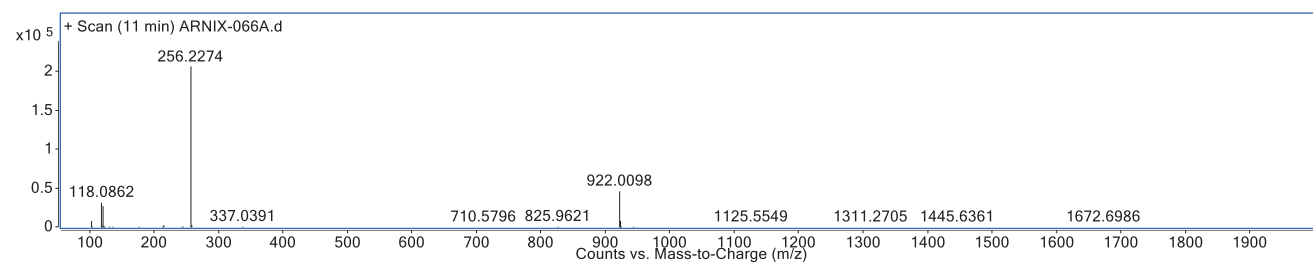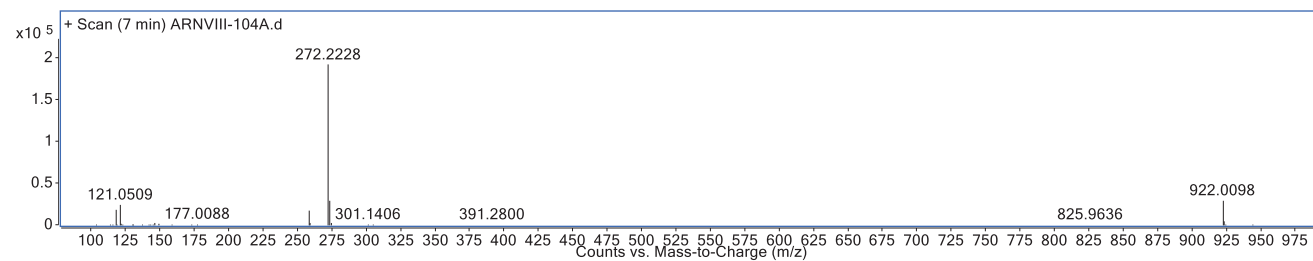

**Supplementary Figure S17: Hydroxylation of (-)-23 by PikC-RhFRED variants, LC-MS traces and HRMS of the starting material (A) and product (B).**

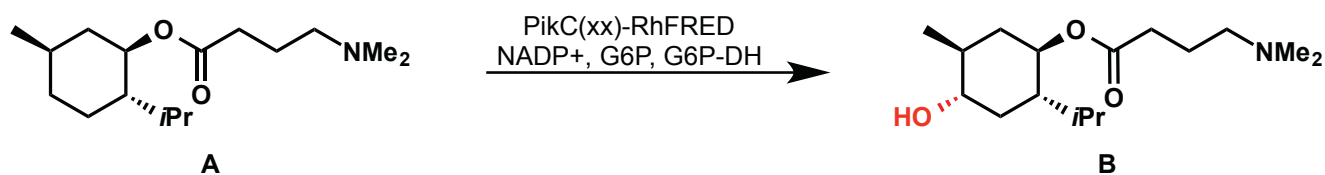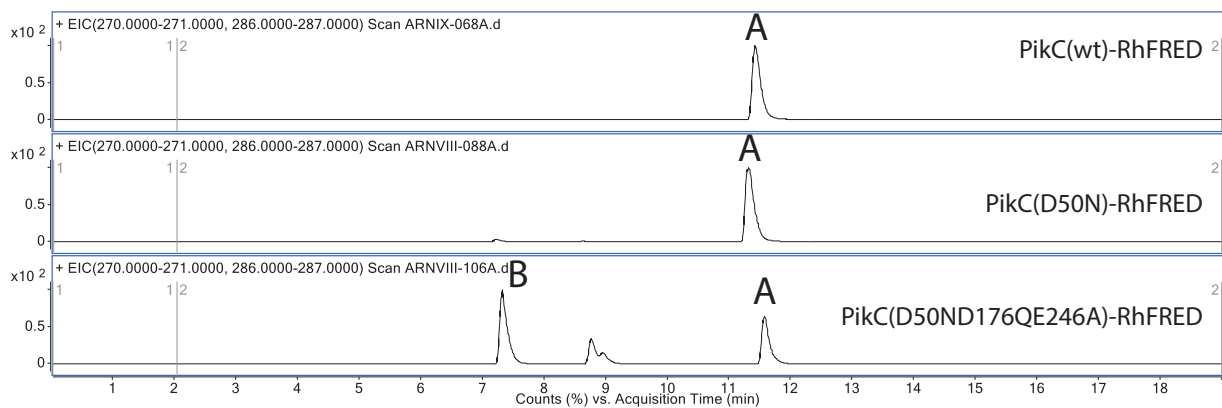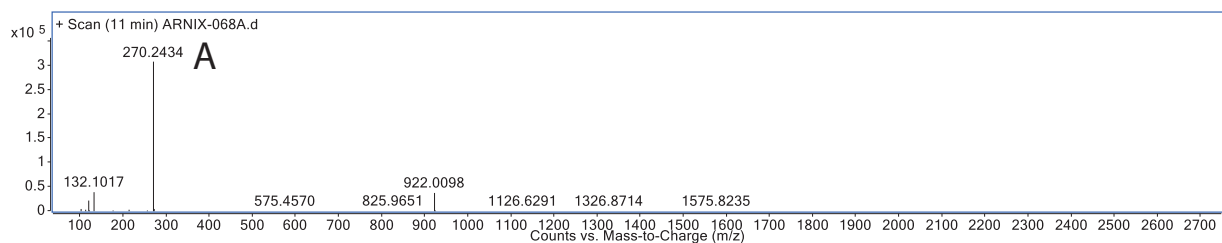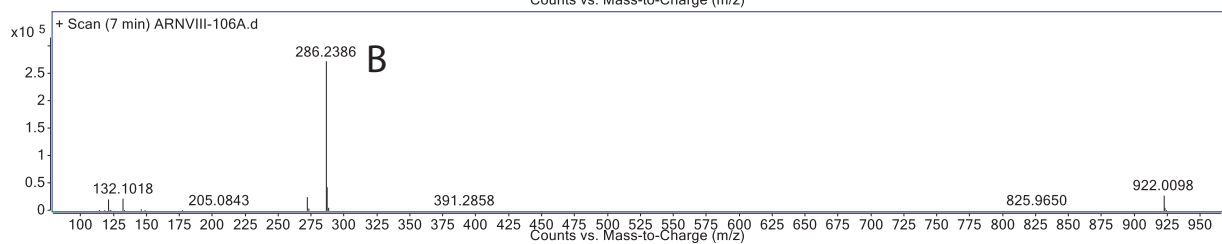

**Supplementary Figure S18: Hydroxylation of (-)-24 by PikC-RhFRED variants, LC-MS traces and HRMS of the starting material (A) and product (B).**

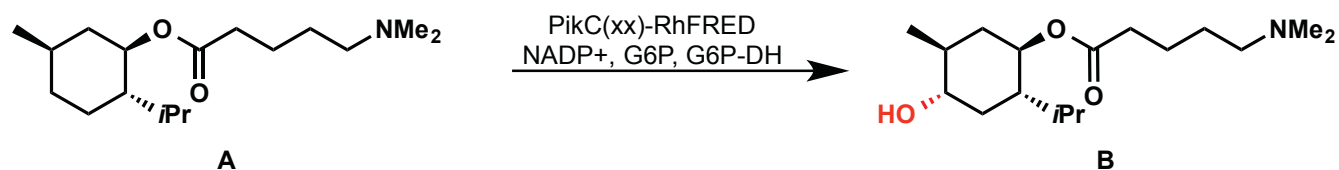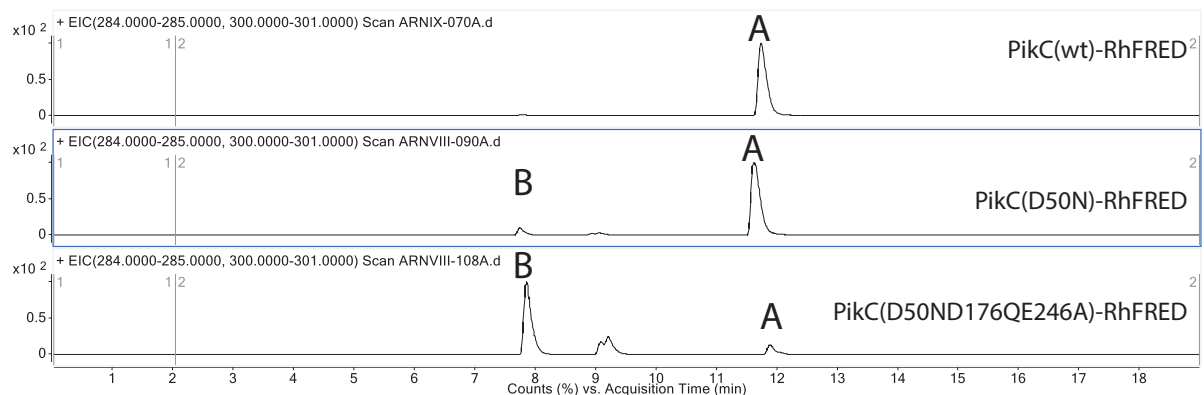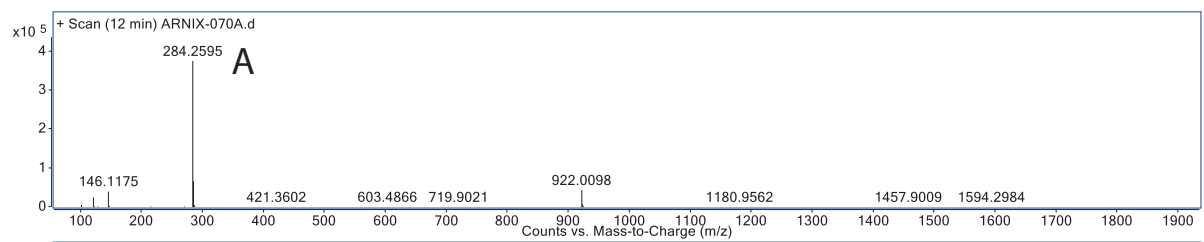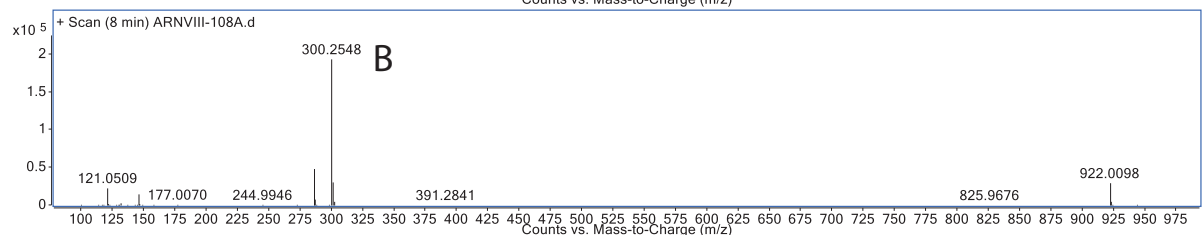



**Supplementary Figure S19: Hydroxylation of (-)-25 by PikC-RhFRED variants, LC-MS traces and HRMS of the starting material (A) and product (B).**

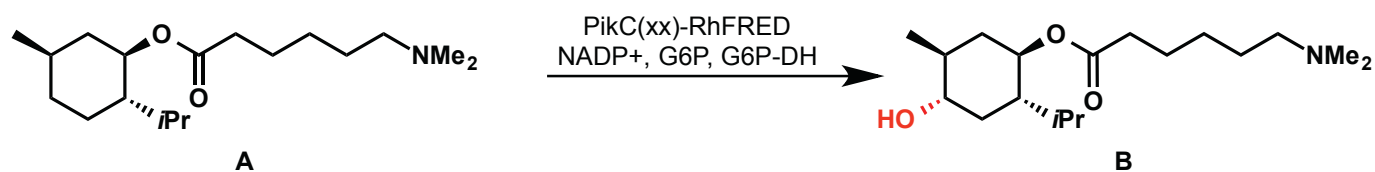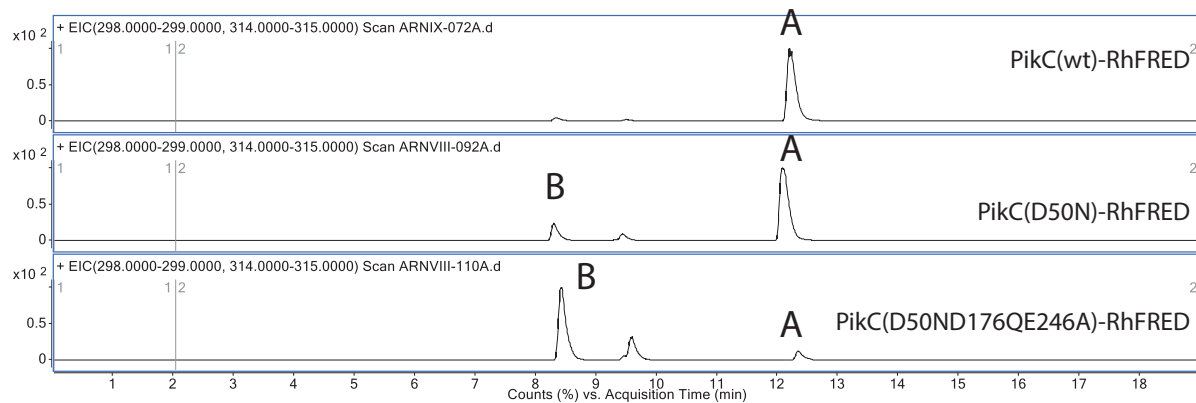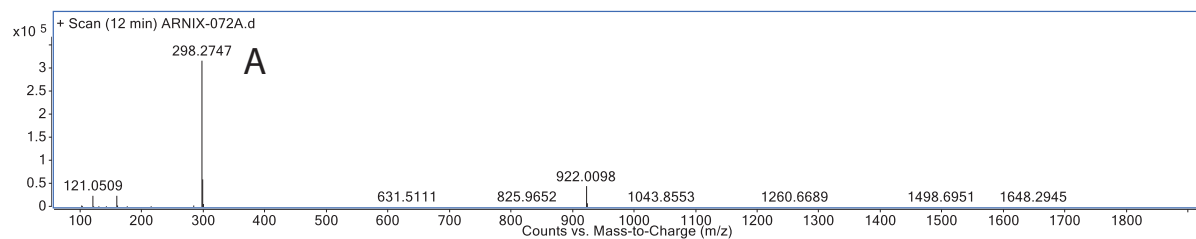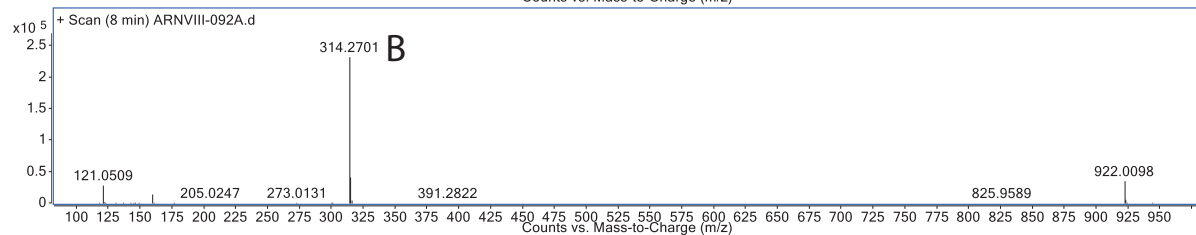

**Supplementary Figure S20: Hydroxylation of (-)-26 by PikC-RhFRED variants, LC-MS traces and HRMS of the starting material (A) and product (B).**

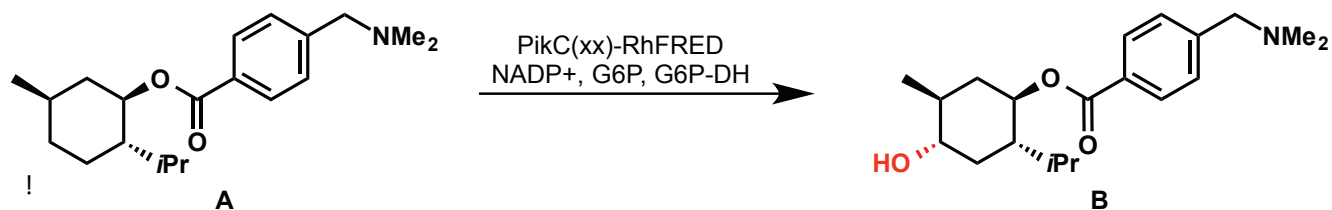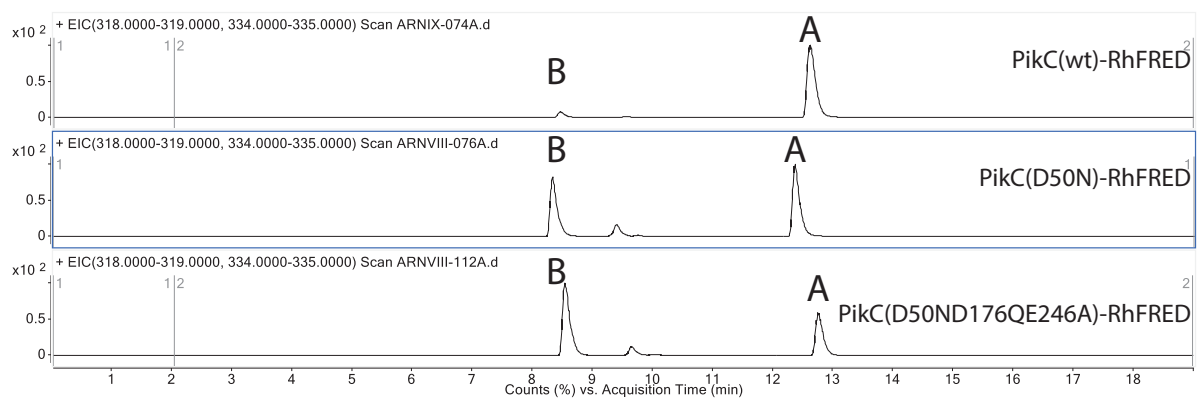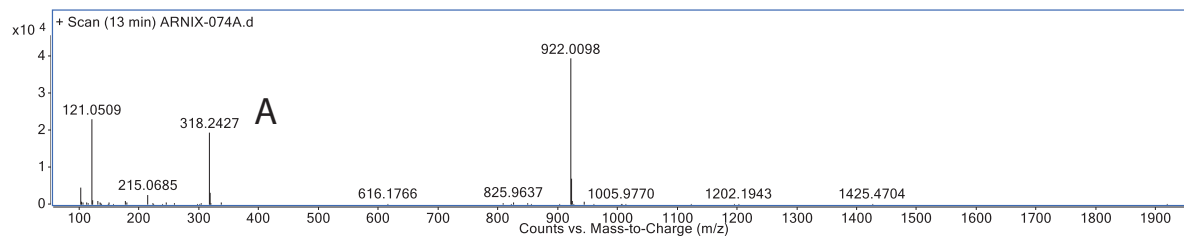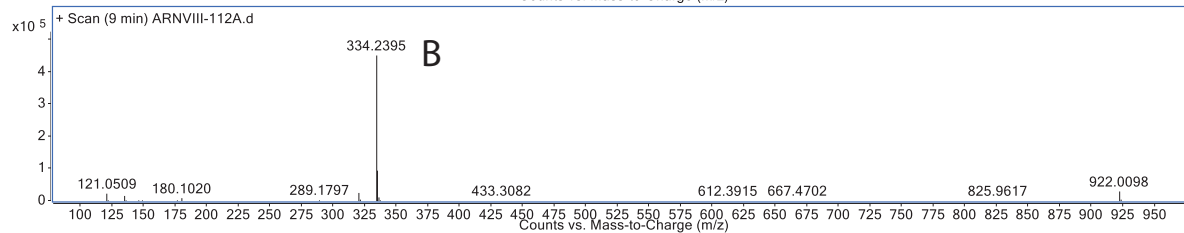

**Supplementary Figure S21: Hydroxylation of (-)-27 by PikC-RhFRED variants, LC-MS traces and HRMS of the starting material (A) and product (B).**

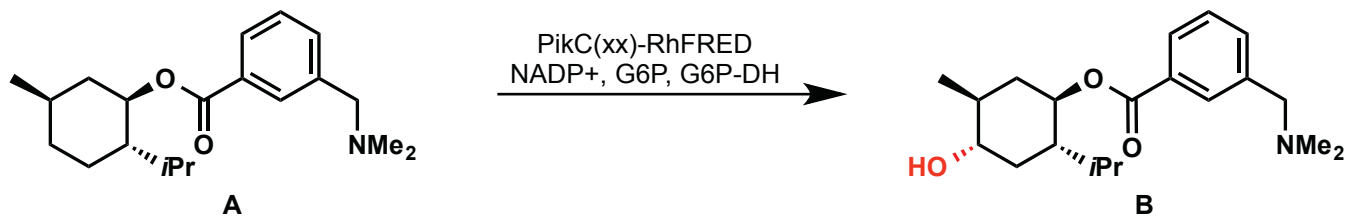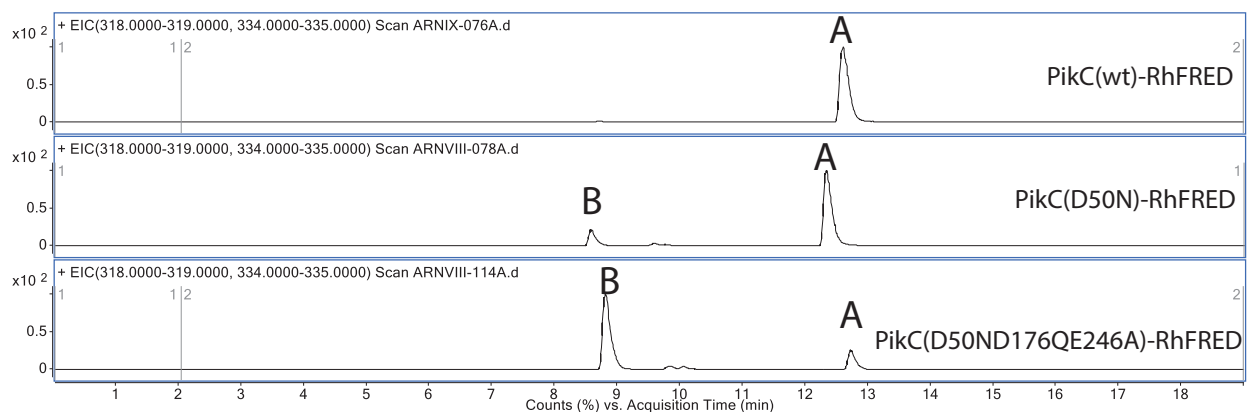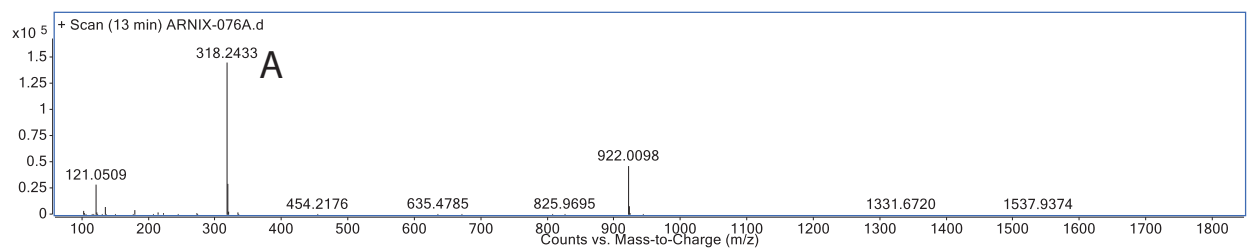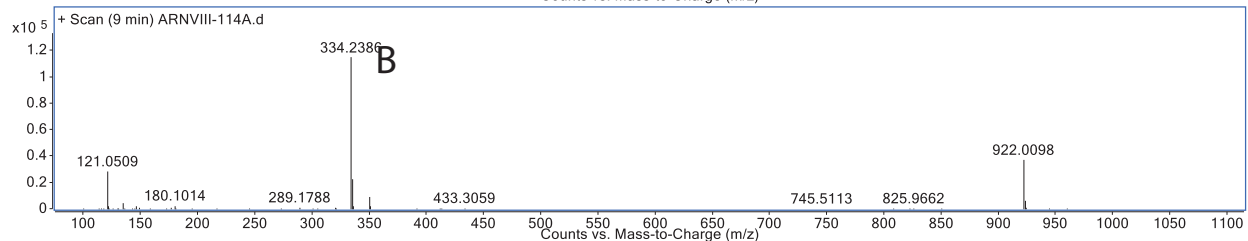

**Supplementary Figure S22: Hydroxylation of (-)-28 by PikC-RhFRED variants, LC-MS traces and HRMS of the starting material (A) and product (B).**

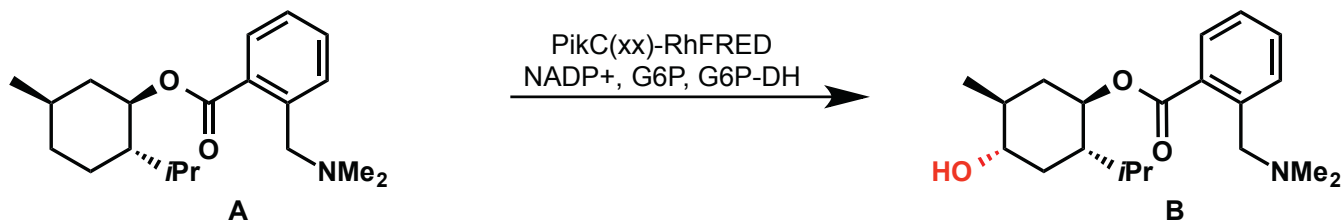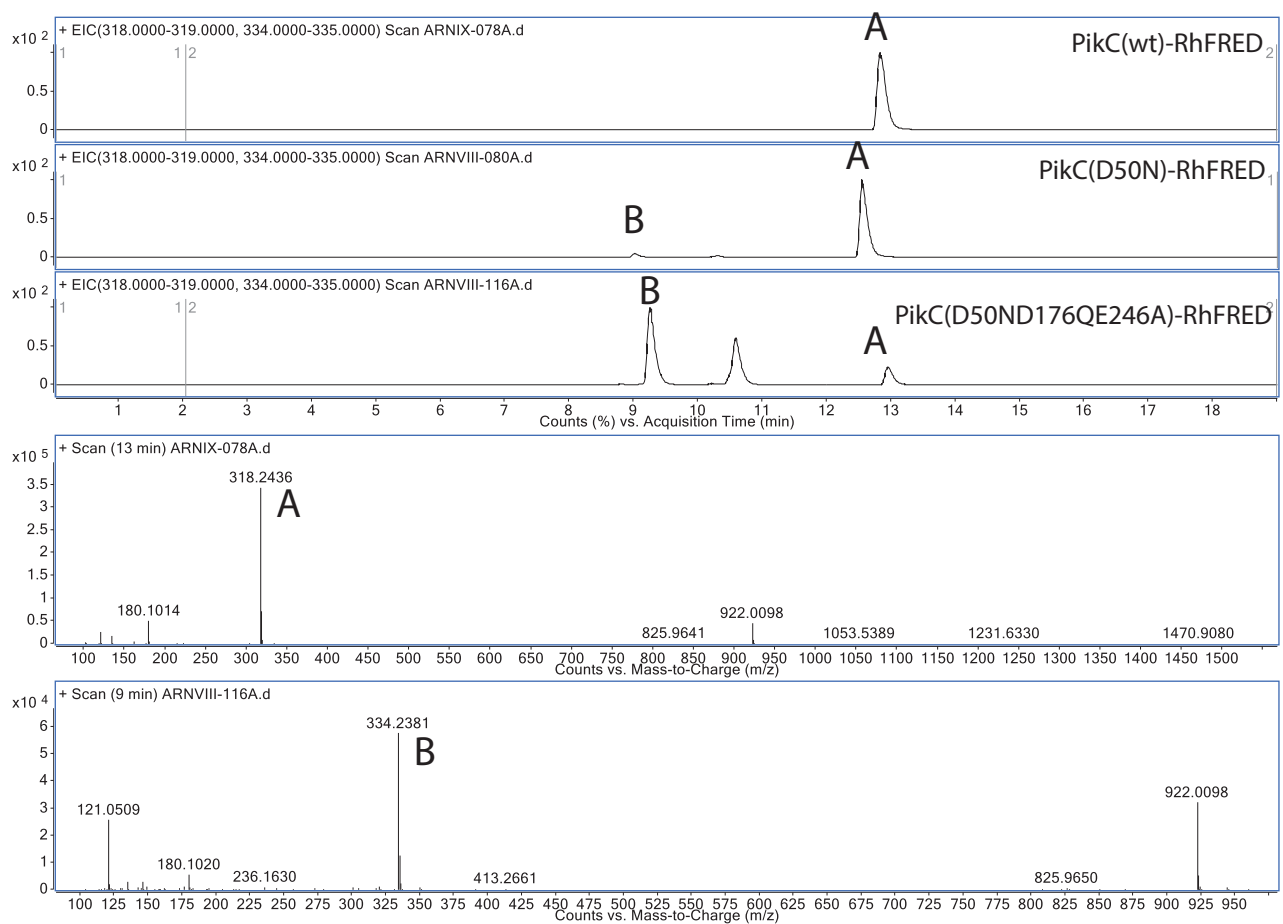

**Supplementary Figure S23: Hydroxylation of (+)-21 by PikC-RhFRED variants, LC-MS traces and HRMS of the starting material (A) and product (B).**

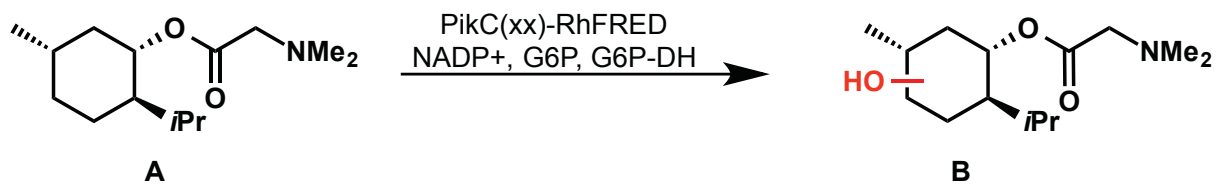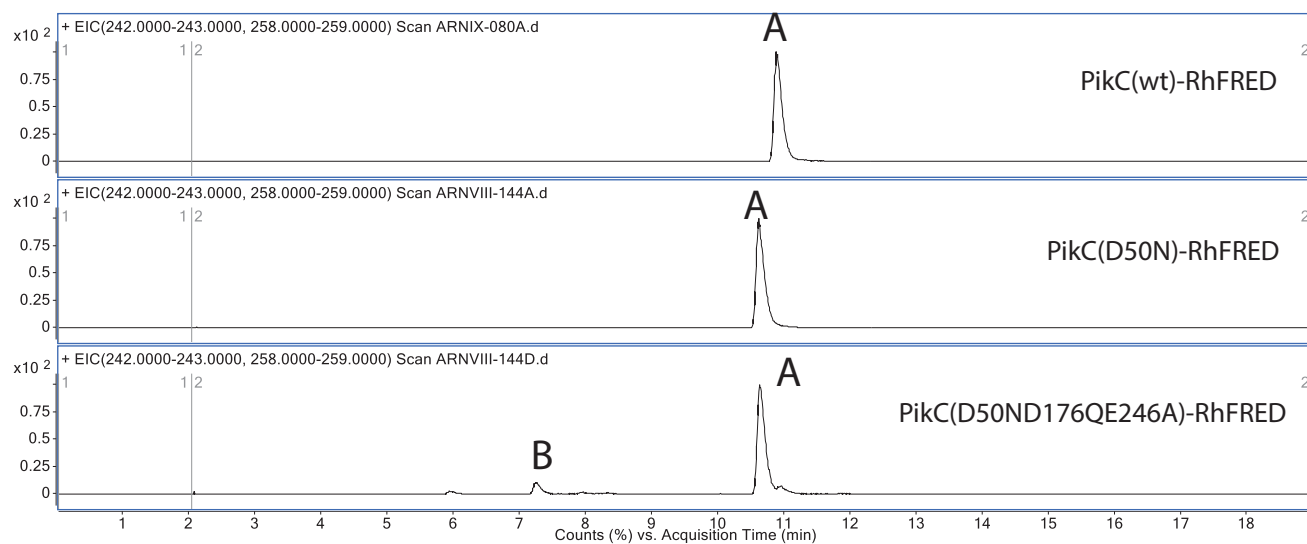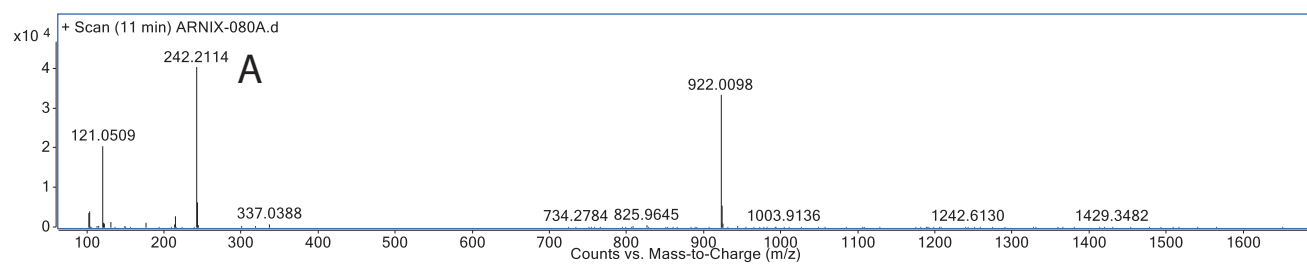

**Supplementary Figure S24: Hydroxylation of (+)-22 by PikC-RhFRED variants, LC-MS traces and HRMS of the starting material (A) and product (B).**

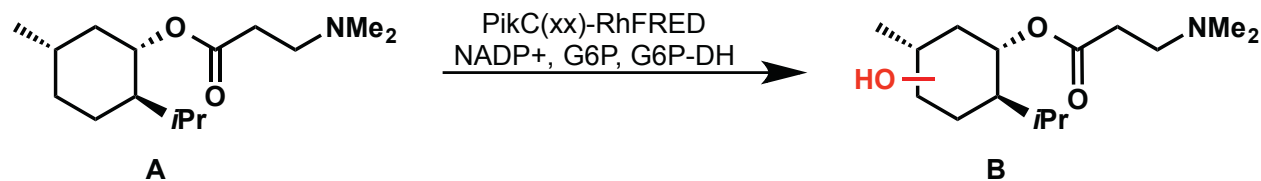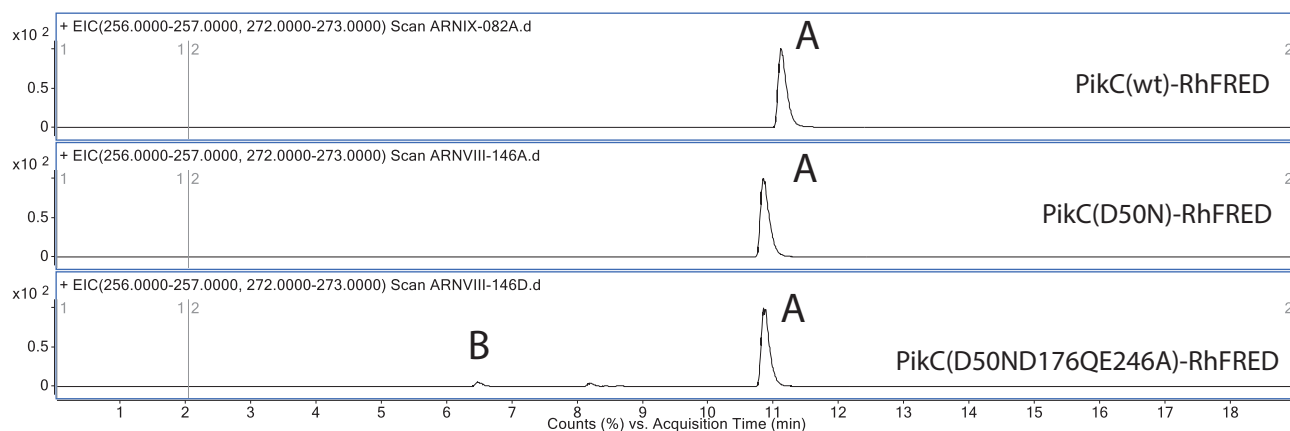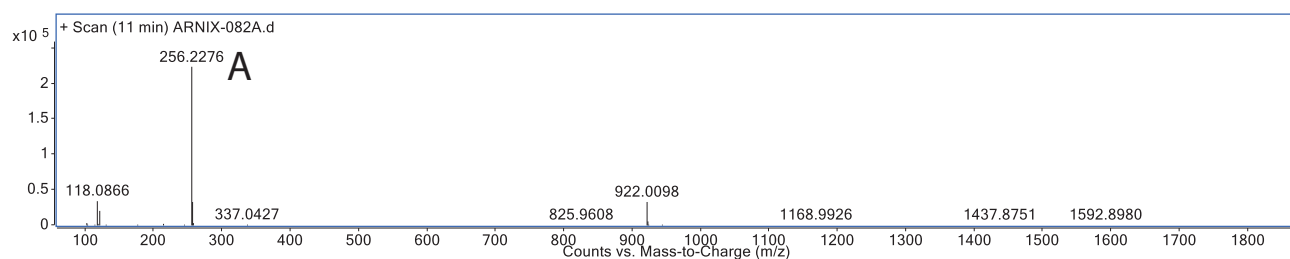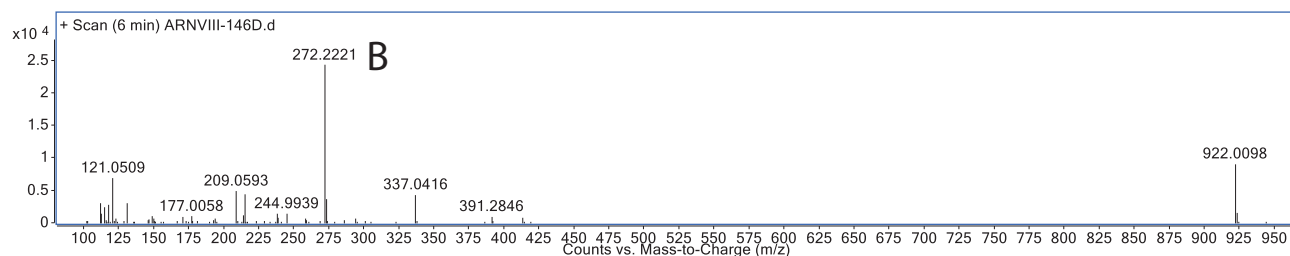

**Supplementary Figure S25: Hydroxylation of (+)-23 by PikC-RhFRED variants, LC-MS traces and HRMS of the starting material (A) and product (B).**

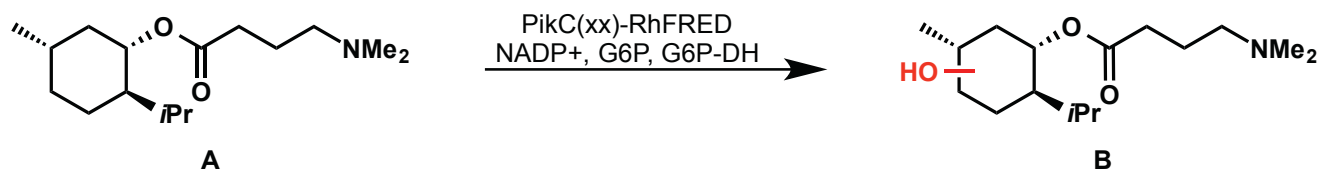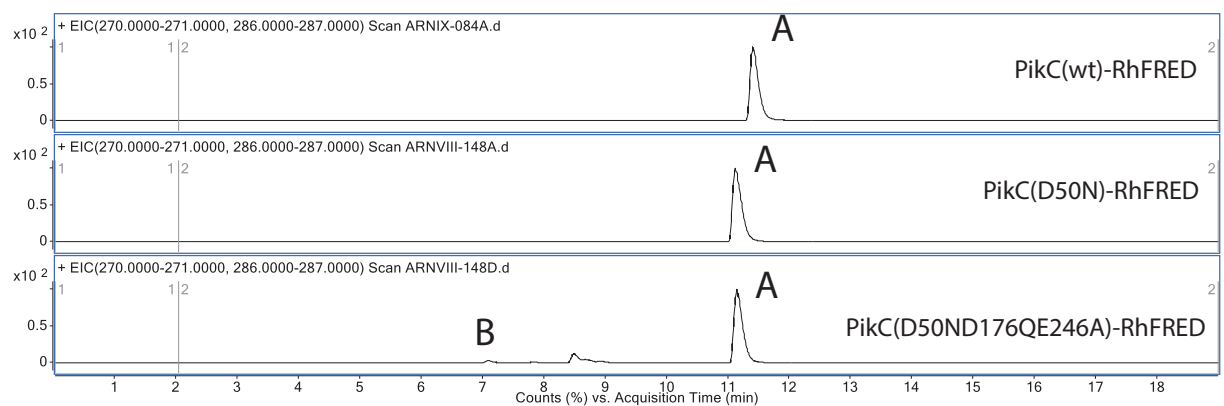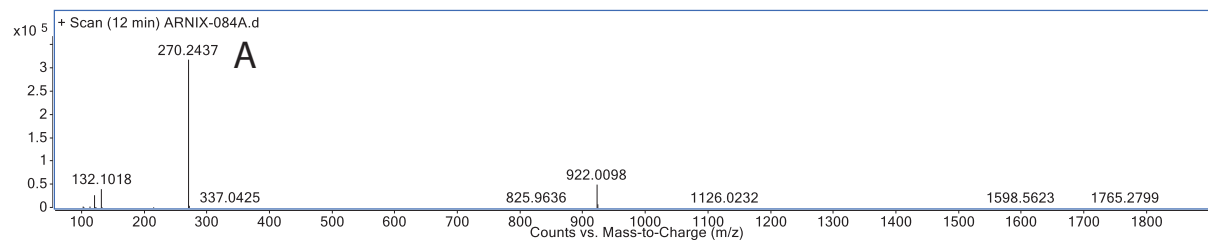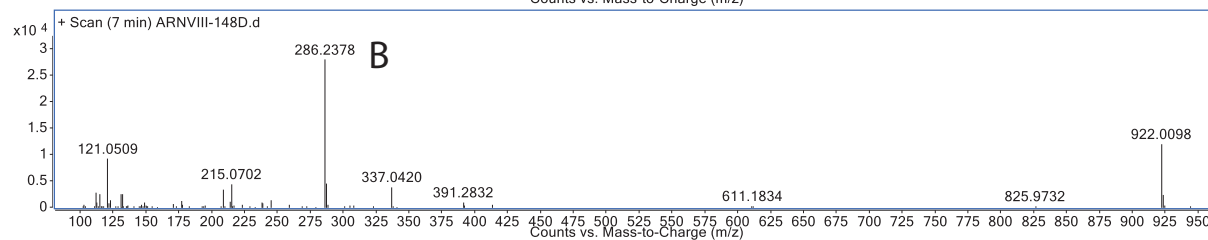

**Supplementary Figure S26: Hydroxylation of (+)-24 by PikC-RhFRED variants, LC-MS traces and HRMS of the starting material (A) and product (B).**

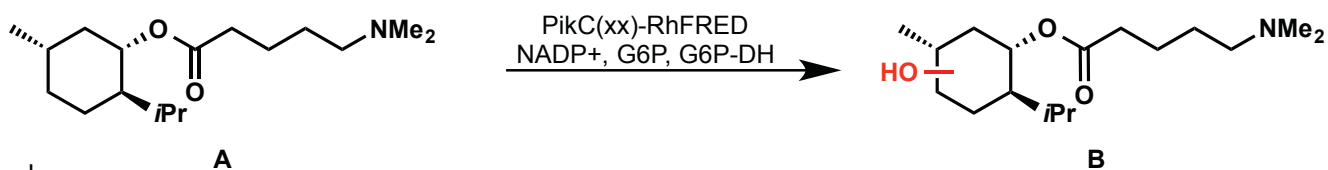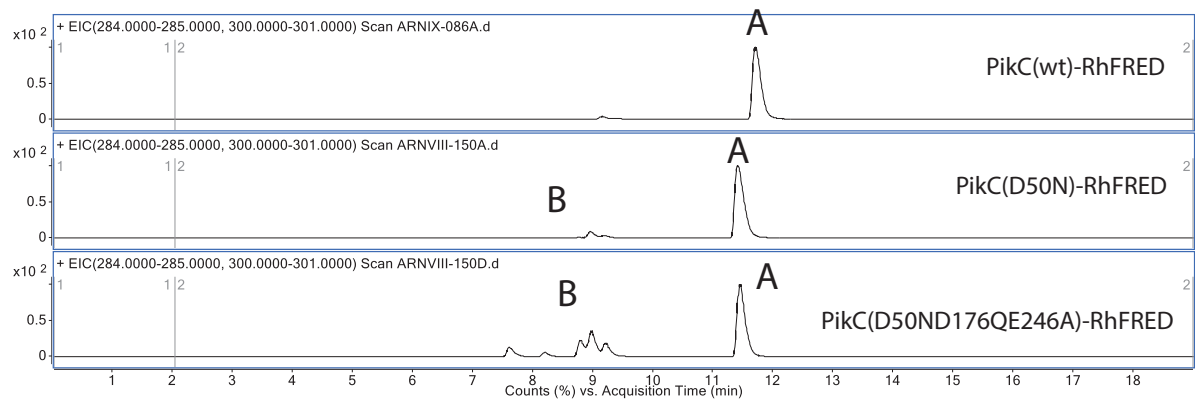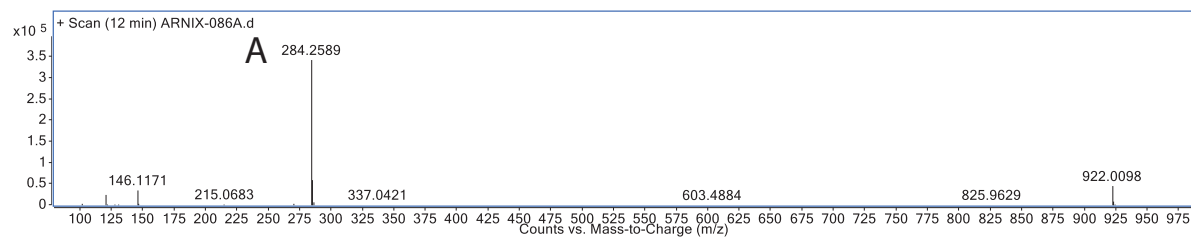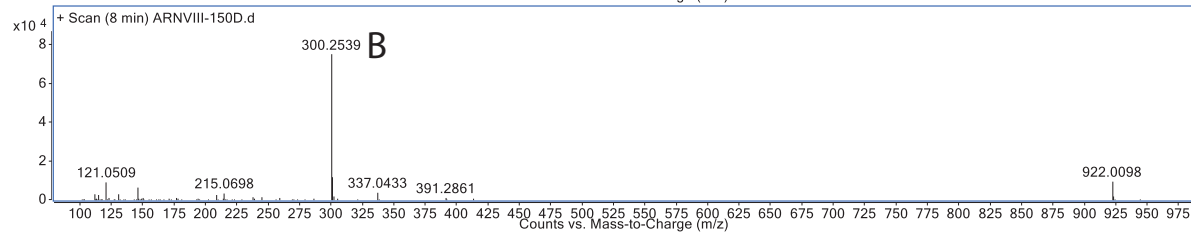



**Supplementary Figure S27: Hydroxylation of (+)-25 by PikC-RhFRED variants, LC-MS traces and HRMS of the starting material (A) and product (B).**

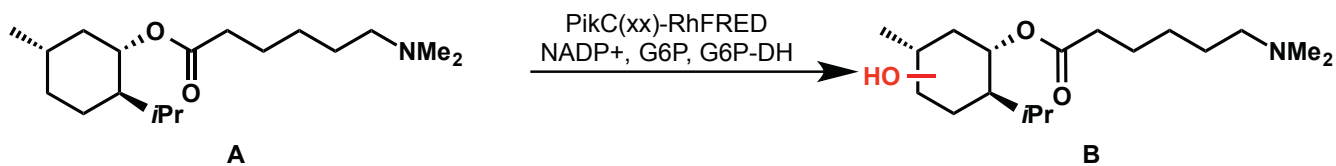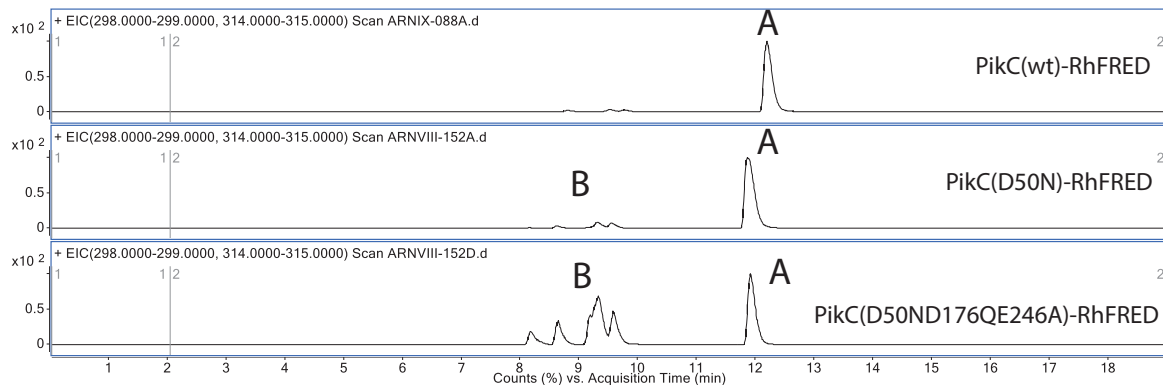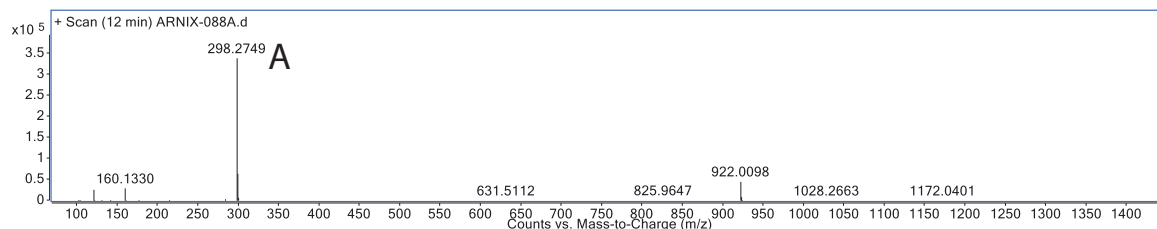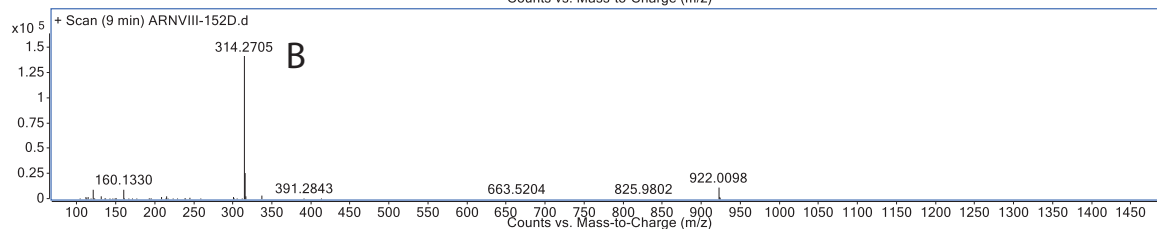

**Supplementary Figure S28: Hydroxylation of (+)-26 by PikC-RhFRED variants, LC-MS traces and HRMS of the starting material (A) and product (B).**

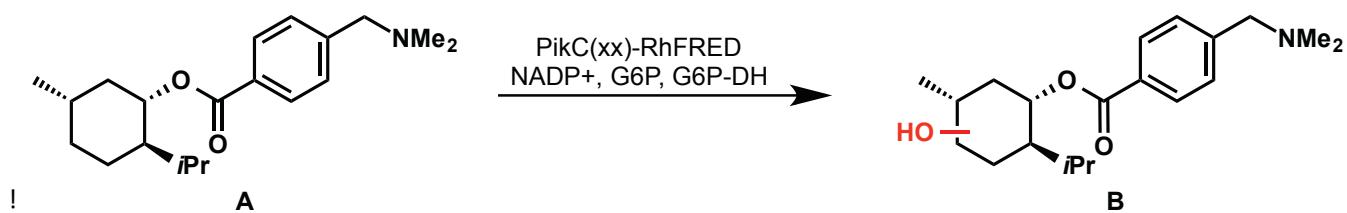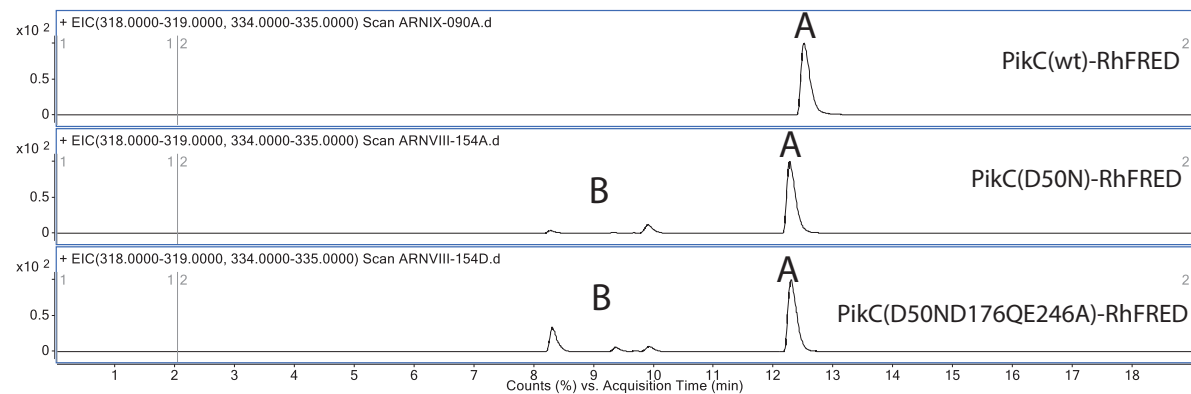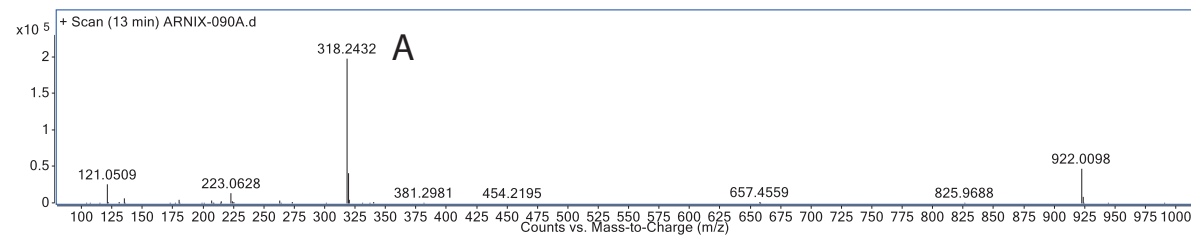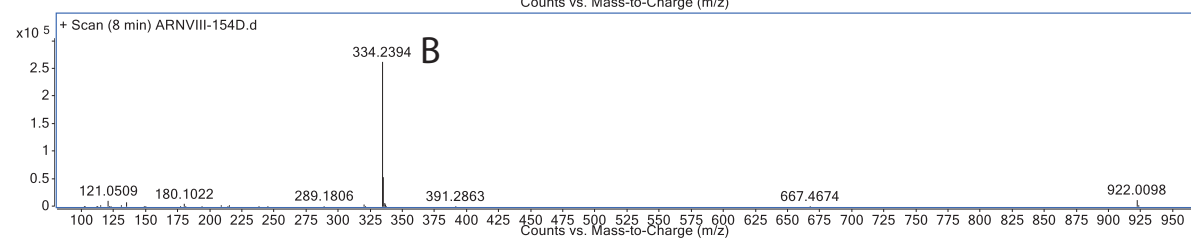

**Supplementary Figure S29: Hydroxylation of (+)-27 by PikC-RhFRED variants, LC-MS traces and HRMS of the starting material (A) and product (B).**

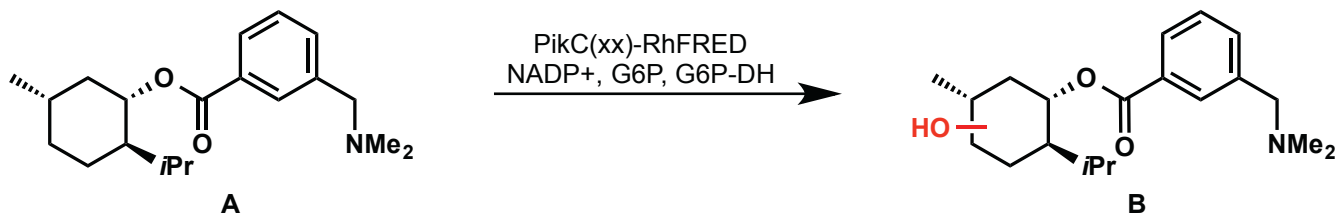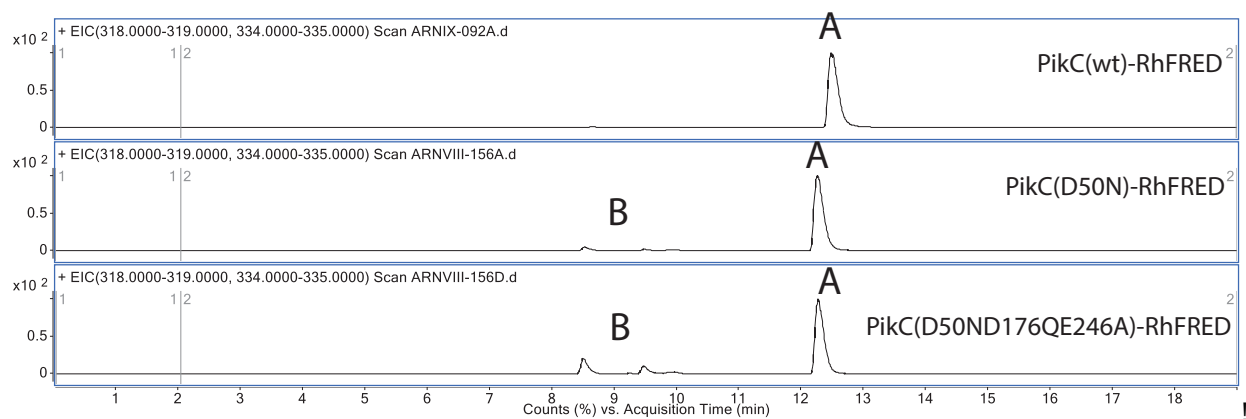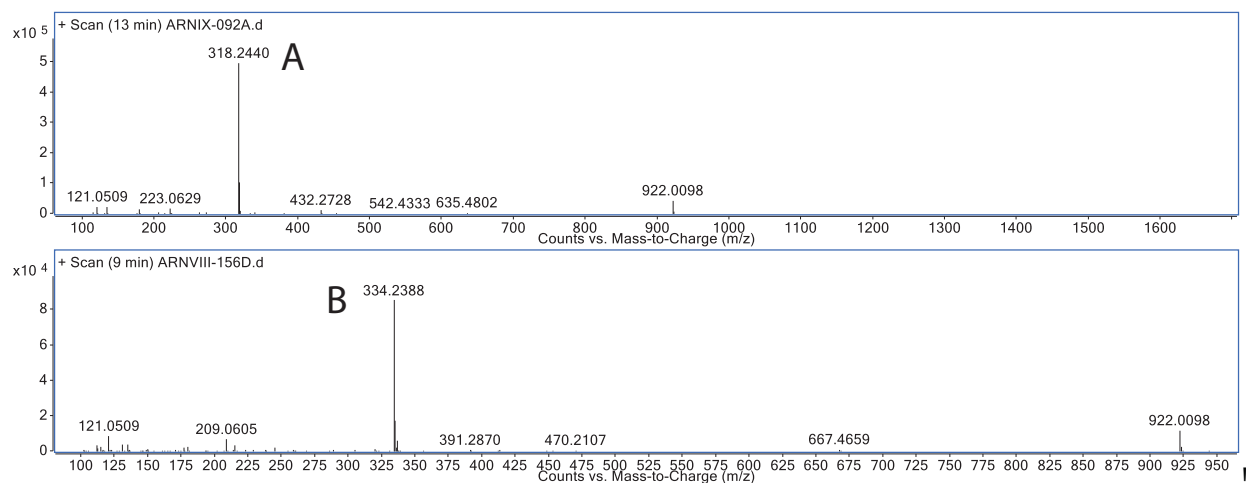

**Supplementary Figure S30: Hydroxylation of (+)-28 by PikC-RhFRED variants, LC-MS traces and HRMS of the starting material (A) and product (B).**

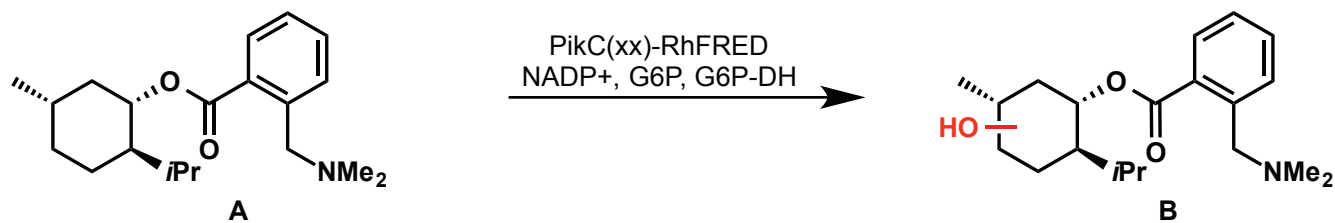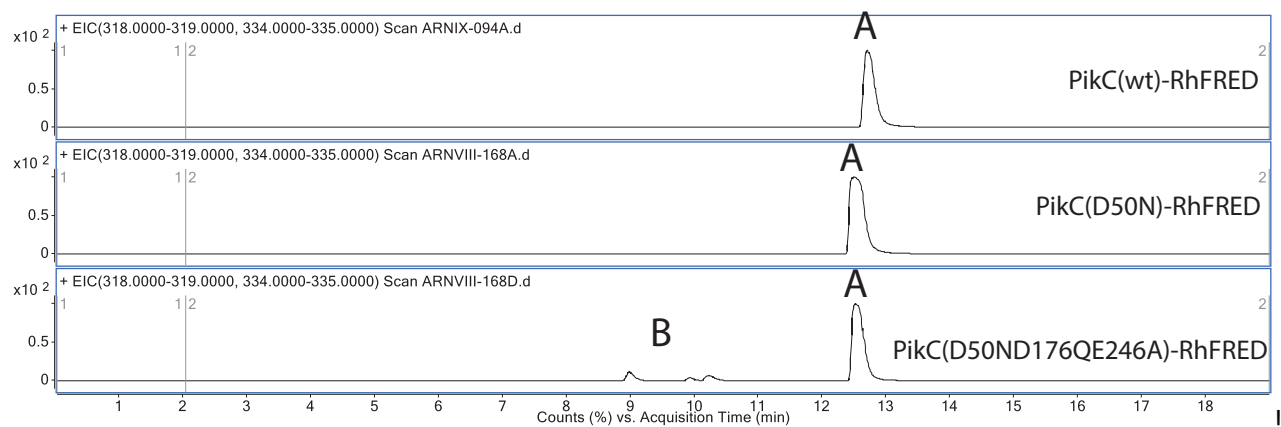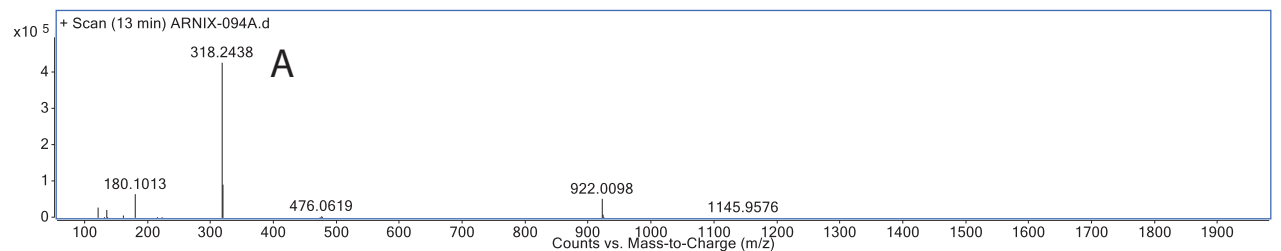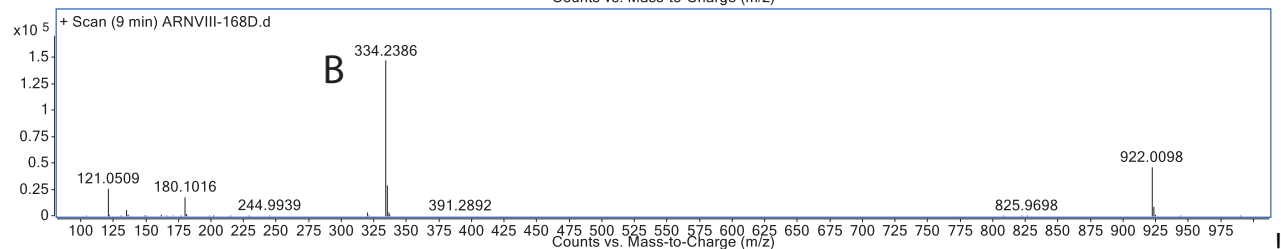

**Supplementary Figure S31: Hydroxylation by PikC<sub>D50ND176QE246A</sub>-RhFRED, LC-MS traces and HRMS of the starting material (A) and product (B).**

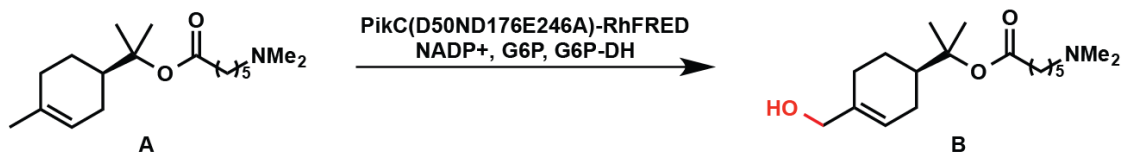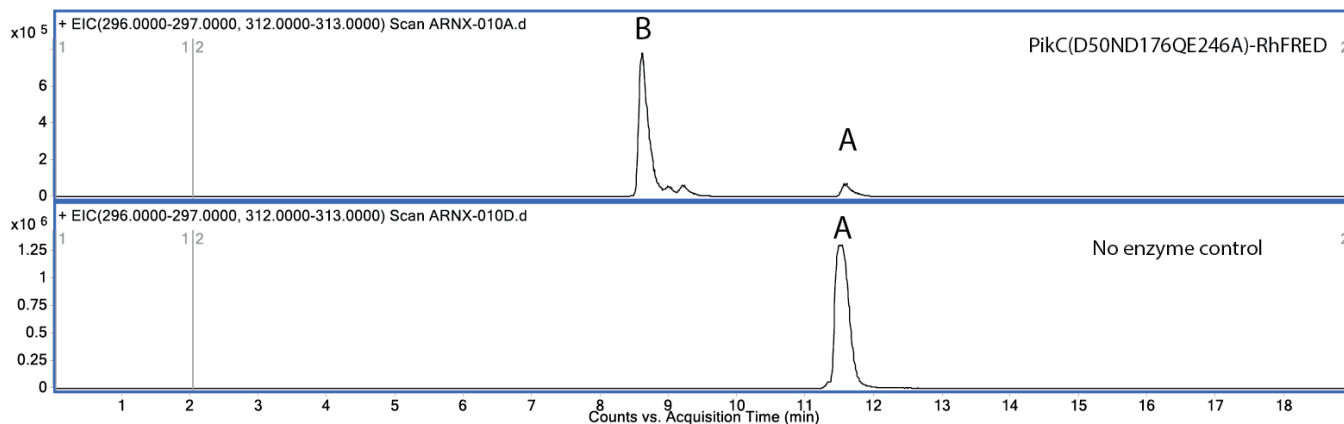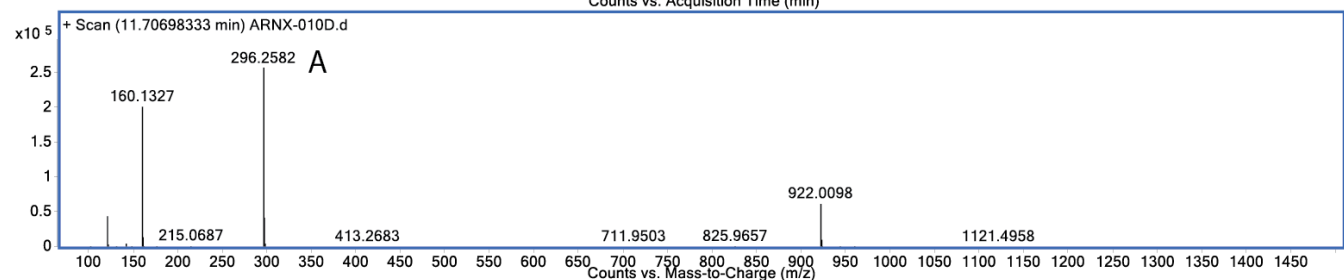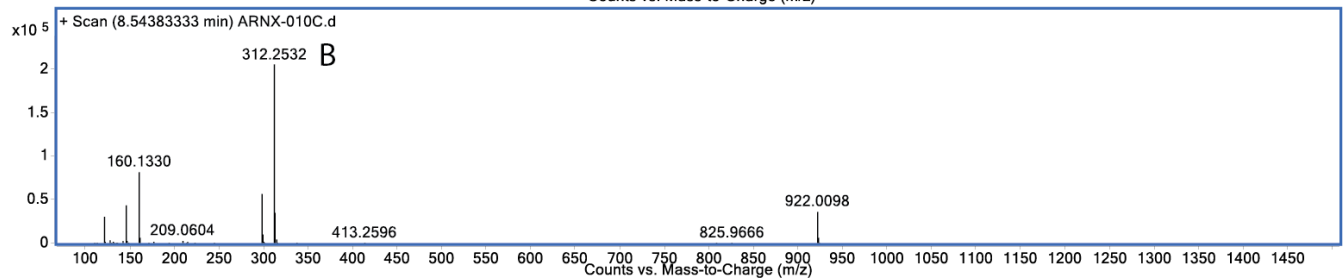

**Supplementary Figure S32: Hydroxylation by PikC<sub>D50ND176QE246A</sub>-RhFRED, LC-MS traces and HRMS of the starting material (A) and product (B).**

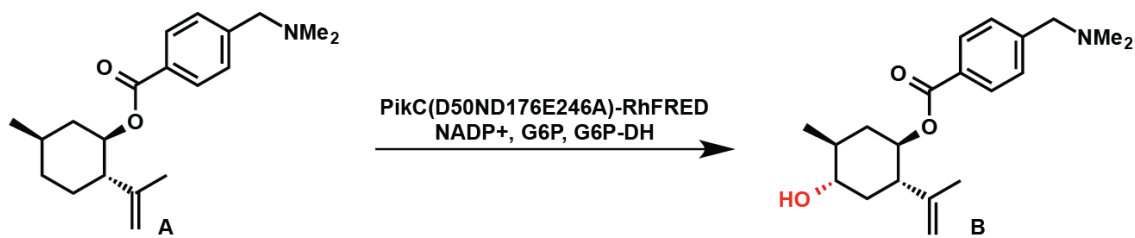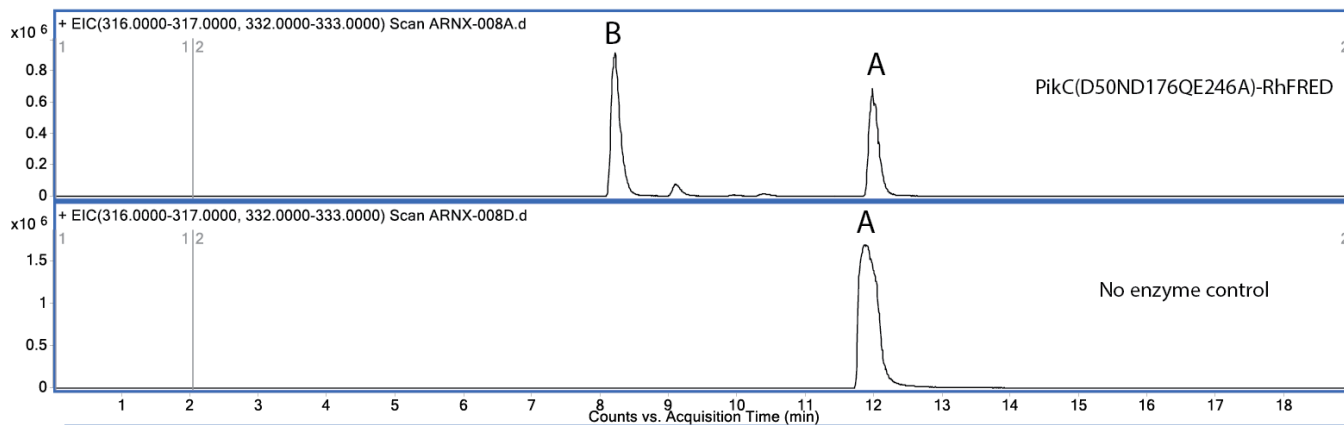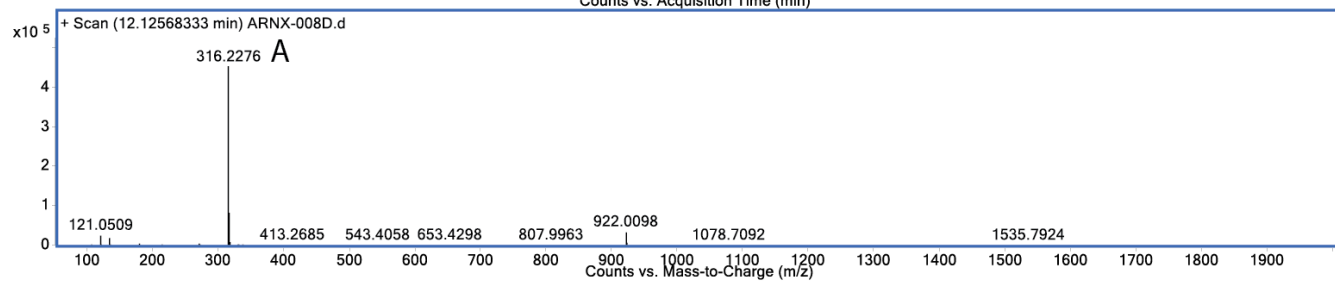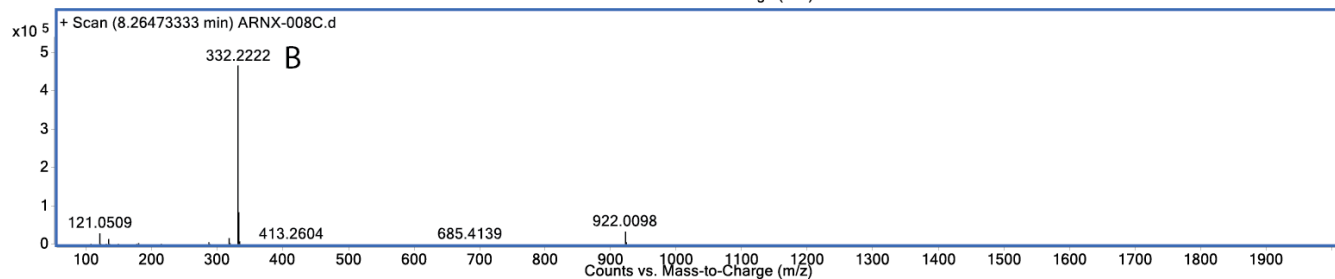

**Supplementary Figure S33: Hydroxylation by PikC<sub>D50ND176QE246A</sub>-RhFRED, LC-MS traces and HRMS of the starting material (A) and product (B).**

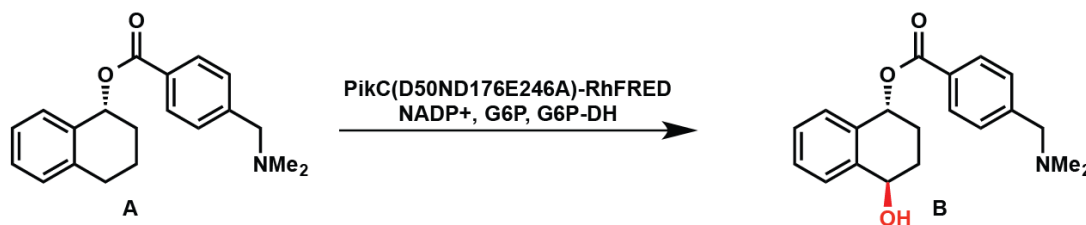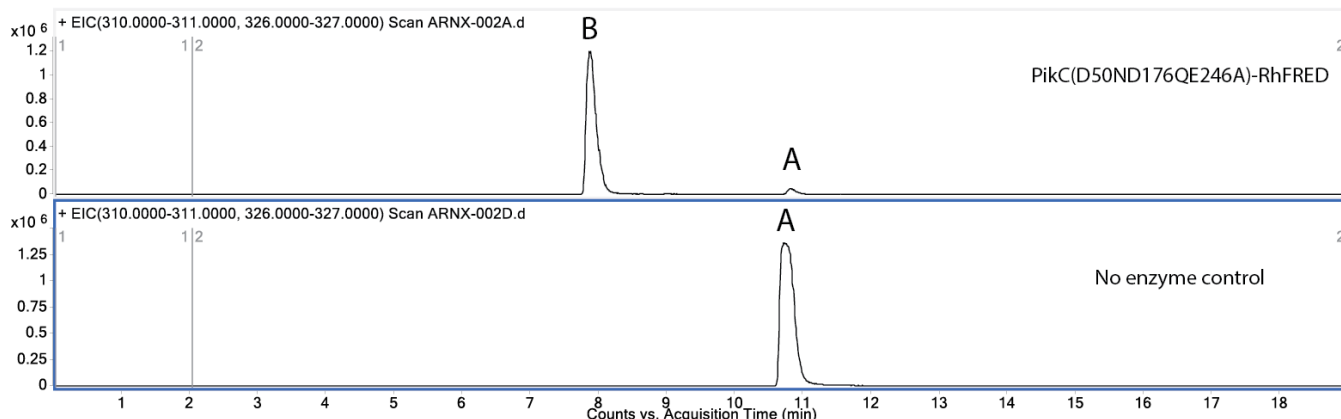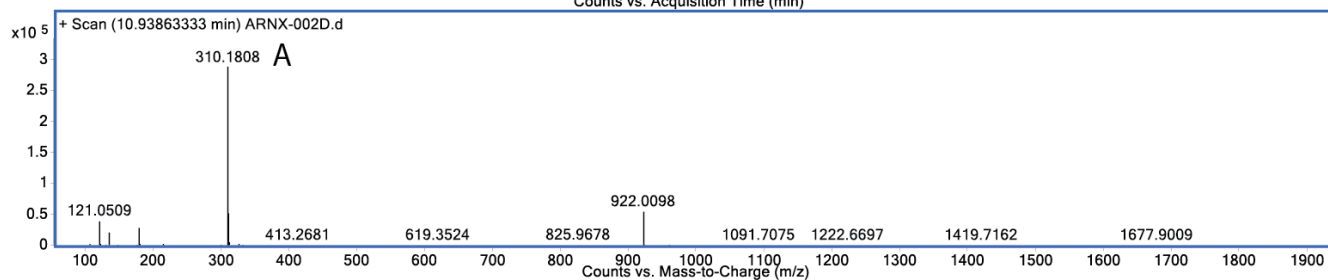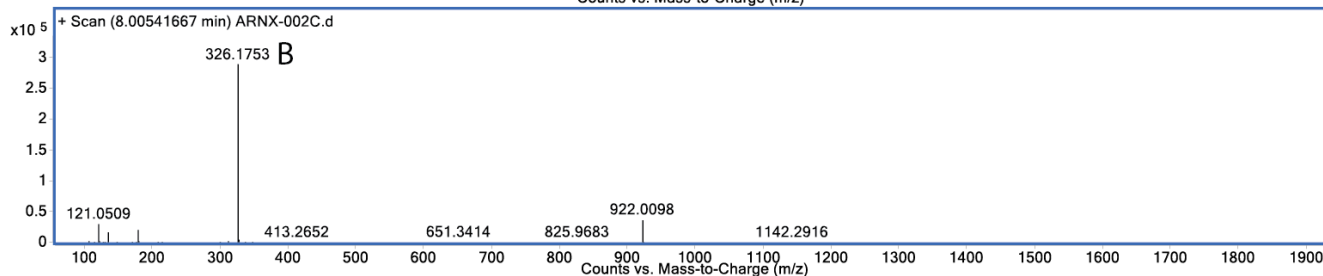

**Supplementary Figure S34: Hydroxylation by PikC<sub>D50ND176QE246A</sub>-RhFRED, LC-MS traces and HRMS of the starting material (A) and product (B).**

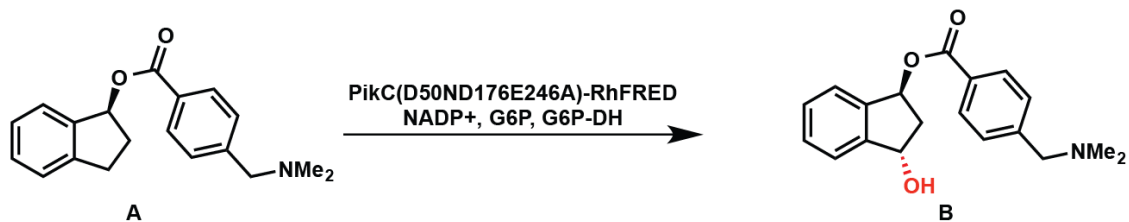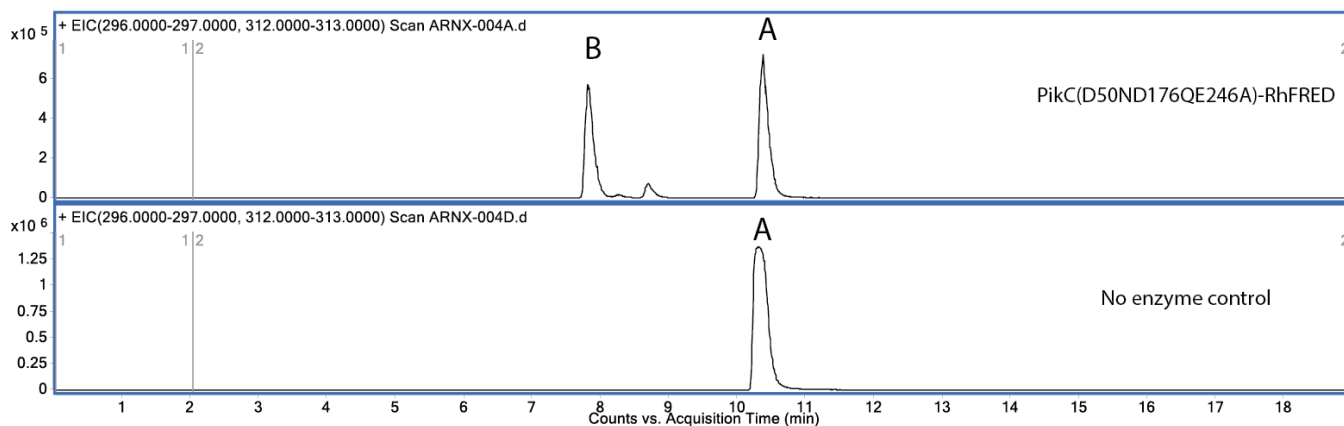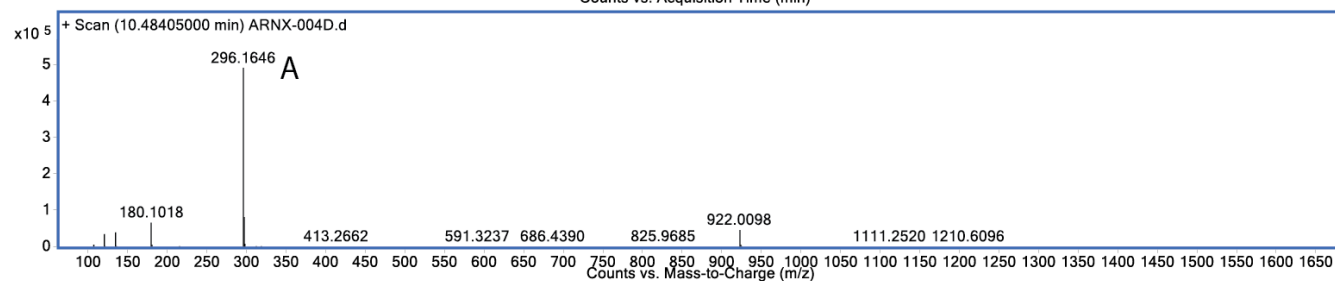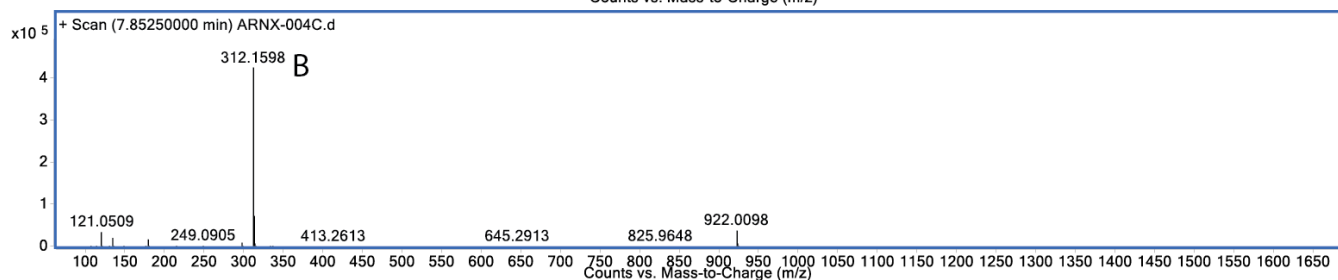



**Supplementary Figure S35: Hydroxylation by PikC<sub>D50ND176QE246A</sub>-RhFRED, LC-MS traces and HRMS of the starting material (A) and product (B).**

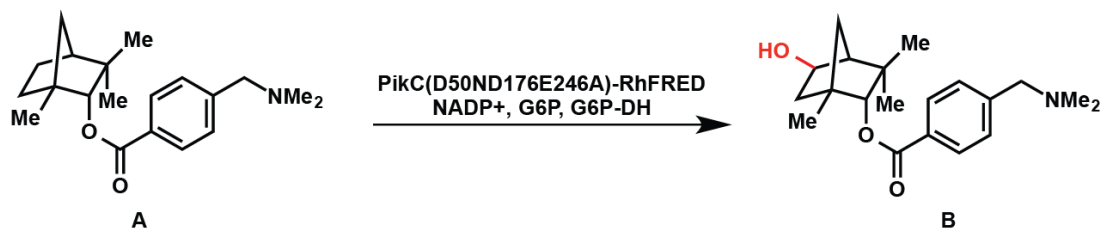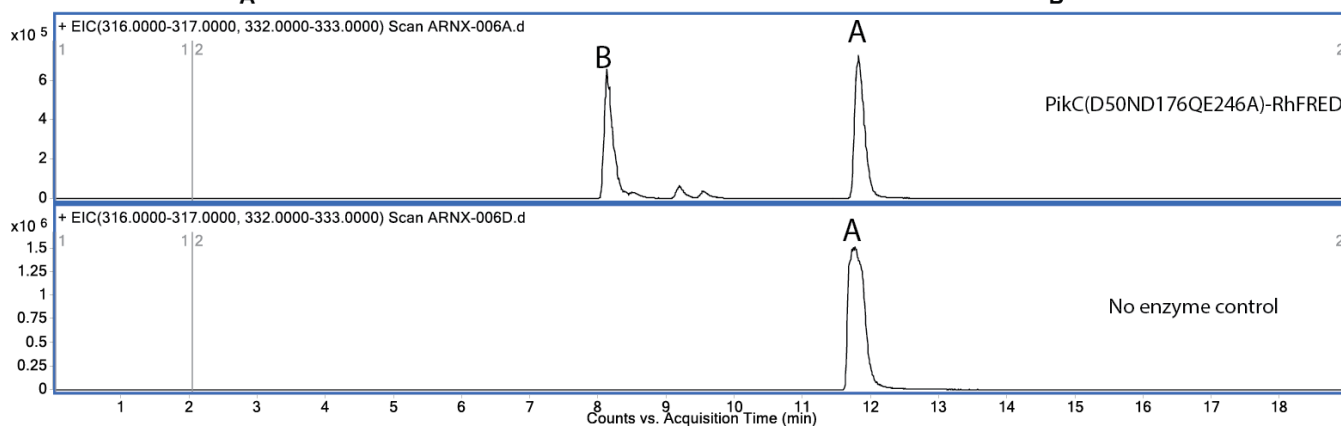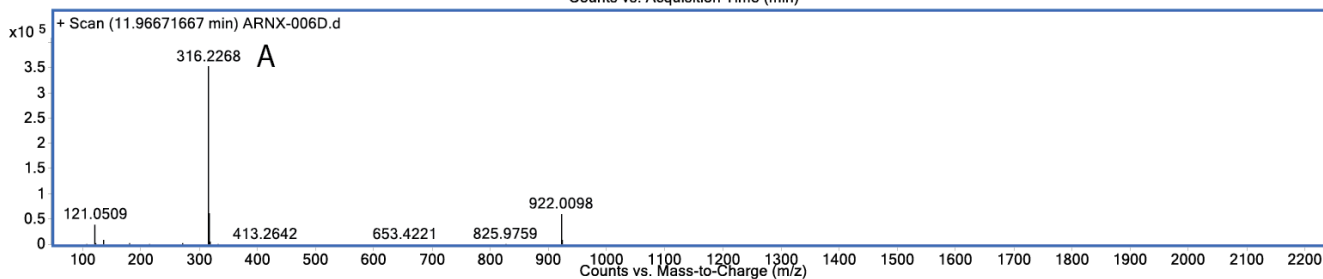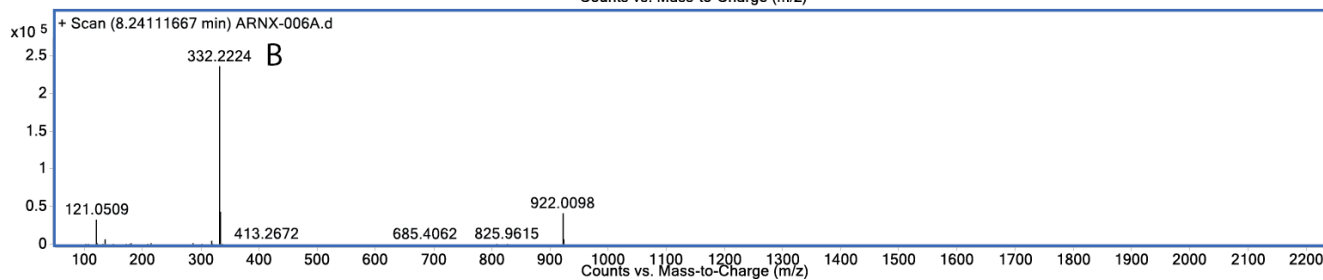

## IV. Product Characterization

### General protocol for anchoring group cleavage

A flame-dried round bottom flask was charged with lithium aluminium hydride (5.0 eq). Under N<sub>2</sub>, the contents of the flask were suspended in 2 mL of THF and cooled to 0 °C. The solution of product from P450 oxidation in THF (1 mL) was then added dropwise via cannula. The reaction mixture was warmed to room temperature and stirred overnight, at which point H<sub>2</sub>O (0.1 mL), 15% NaOH in H<sub>2</sub>O (0.1 mL) and H<sub>2</sub>O (0.2 mL) were added sequentially to quench the reaction. The mixture was diluted with EtOAc (10 mL), filtered to remove aluminum salts and the filtrate was concentrated. The residue obtained was purified by column chromatography to yield the product.

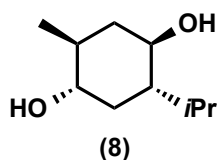

<sup>1</sup>H NMR (400 MHz, CDCl<sub>3</sub>): δ 3.47 (td, *J* = 10.5, 4.4 Hz, 1H), 3.19 (ddd, *J* = 10.9, 9.7, 4.3 Hz, 1H), 2.19-2.10 (m, 1H), 1.96 (dt, *J* = 12.7, 4.1 Hz, 1H), 1.85 (ddd, *J* = 12.6, 4.3, 3.4 Hz, 1H), 1.47-1.23 (m, 4H), 1.17-1.04 (m, 2H), 1.03 (d, *J* = 6.5 Hz, 3H), 0.94 (d, *J* = 7.0 Hz, 3H), 0.83 (d, *J* = 6.9 Hz, 3H); <sup>13</sup>C NMR (176 MHz, CDCl<sub>3</sub>): δ 76.0, 70.7, 48.5, 42.5, 38.3, 32.3, 25.8, 21.0, 18.2, 15.9; IR (neat, cm<sup>-1</sup>): 3230.0, 2926.2, 1456.0, 1095.8, 1026.9. (8)

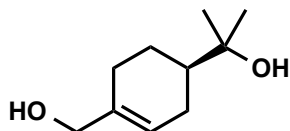

### (*R*)-2-(4-(hydroxymethyl)cyclohex-3-en-1-yl)propan-2-ol, S12

<sup>1</sup>H NMR (400 MHz, CDCl<sub>3</sub>): δ 5.72-5.66 (m, 1H), 4.01 (t, *J* = 2.6 Hz, 2H), 2.22-2.01 (m, 3H), 2.00-1.93 (m, 1H), 1.92-1.80 (m, 1H), 1.60-1.50 (m, 1H), 1.35 – 1.25 (m, 3H), 1.20 (s, 3H), 1.19 (s, 3H); <sup>13</sup>C NMR (100 MHz, CDCl<sub>3</sub>): δ 137.5, 122.4, 72.7, 67.1, 45.1, 27.4, 26.6, 26.5, 26.4, 23.6; HRMS (ESI) *m/z* calculated for [M+H]<sup>+</sup> 171.1380, found 188.1645.

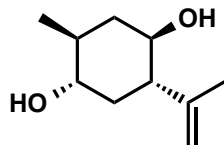

### (1*S*,2*S*,4*R*,5*S*)-2-methyl-5-(prop-1-en-2-yl)cyclohexane-1,4-diol, S13

<sup>1</sup>H NMR (400 MHz, CDCl<sub>3</sub>): δ 4.94-4.90 (m, 1H), 4.87-4.84 (m, 1H), 3.52 (td, *J* = 10.5, 4.3 Hz, 1H), 3.31-3.21 (m, 1H), 2.13-2.00 (m, 2H), 1.92 (dt, *J* = 12.7, 3.9 Hz, 1H), 1.86-1.80 (m, 1H), 1.74-1.69 (m, 3H), 1.54-1.37 (m, 3H), 1.19-1.09 (m, 1H), 1.06 (d, *J* = 6.5 Hz, 3H); <sup>13</sup>C NMR (100 MHz, CDCl<sub>3</sub>): δ 145.2, 113.6, 75.3, 69.6, 52.5, 40.3, 38.2, 38.0, 19.0, 18.2; HRMS (ESI) *m/z* calculated for [M+H]<sup>+</sup> 171.1380, found 188.1654.

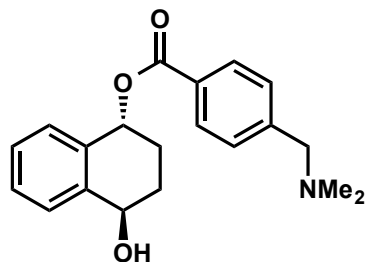

**(1R,4R)-4-hydroxy-1,2,3,4-tetrahydronaphthalen-1-yl 4-((dimethylamino)methyl)benzoate, 33**

$^1\text{H}$  NMR (400 MHz,  $\text{CDCl}_3$ )  $\delta$  7.98 (d,  $J = 8.2$  Hz, 2H), 7.50 (d,  $J = 7.4$  Hz, 1H), 7.41 – 7.33 (m, 4H), 7.30 (t,  $J = 7.4$  Hz, 1H), 6.26 (t,  $J = 4.8$  Hz, 1H), 4.92 (t,  $J = 4.7$  Hz, 1H), 3.46 (s, 2H), 2.51 – 2.41 (m, 1H), 2.41 – 2.31 (m, 1H), 2.23 (s, 6H), 2.09 – 1.99 (m, 1H), 1.99 – 1.92 (m, 1H);  $^{13}\text{C}$  NMR (100 MHz,  $\text{CDCl}_3$ )  $\delta$  166.1, 144.3, 139.4, 134.4, 129.7, 129.4, 129.2, 128.9, 128.8, 128.6, 128.3, 70.0, 67.5, 64.0, 45.4, 28.4, 25.0; IR (thin film,  $\text{cm}^{-1}$ ) 3398, 2940, 2776, 1708, 1453, 1263; HRMS (ESI)  $m/z$  calculated for  $[\text{M}+\text{H}]^+$  326.1751, found 326.1753.

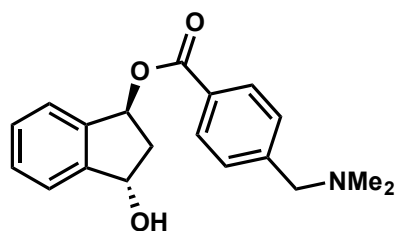

**(1S,3S)-3-hydroxy-2,3-dihydro-1H-inden-1-yl 4-((dimethylamino)methyl)benzoate, 34**

$^1\text{H}$  NMR (500 MHz,  $\text{CDCl}_3$ )  $\delta$  7.97 (d,  $J = 8.1$  Hz, 2H), 7.53 (d,  $J = 7.5$  Hz, 1H), 7.50 (d,  $J = 7.5$  Hz, 1H), 7.43 (t,  $J = 7.4$  Hz, 1H), 7.37 (m, 3H), 6.56 (dd,  $J = 6.7, 2.9$  Hz, 1H), 5.56 (t,  $J = 5.7$  Hz, 1H), 3.48 (s, 2H), 2.74 – 2.64 (m, 1H), 2.53 – 2.42 (m, 1H), 2.25 (s, 6H);  $^{13}\text{C}$  NMR (126 MHz,  $\text{CDCl}_3$ )  $\delta$  166.4, 145.9, 140.6, 129.8, 129.0, 128.9, 126.2, 124.4, 76.7, 74.4, 63.9, 45.3, 43.5; IR (thin film,  $\text{cm}^{-1}$ ) 3388, 2932, 1712, 1611, 1459, 1268, 1175; HRMS (ESI)  $m/z$  calculated for  $[\text{M}+\text{H}]^+$  312.1594, found 312.1598.

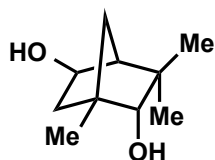

**(1S,2R,4S,5R)-1,3,3-trimethylbicyclo[2.2.1]heptane-2,5-diol, S14 (9)**

$^1\text{H}$  NMR (500 MHz,  $\text{CDCl}_3$ )  $\delta$  4.17 – 4.13 (m, 1H), 3.23 (d,  $J = 1.6$  Hz, 1H), 2.18 (ddd,  $J = 13.8, 6.7, 2.5$  Hz, 1H), 1.70 (s, 1H), 1.56 (dd,  $J = 10.6, 1.6$  Hz, 1H), 1.37 (d,  $J = 10.6$  Hz, 1H), 1.20 (d,  $J = 6.2$  Hz, 1H), 1.12 (s, 3H), 1.03 (s, 3H), 0.84 (s, 3H);  $^{13}\text{C}$  NMR (126 MHz,  $\text{CDCl}_3$ )  $\delta$  83.5, 71.5, 55.6, 48.5, 38.8, 38.1, 36.5, 30.6, 19.5, 18.9; IR (thin film,  $\text{cm}^{-1}$ ) 3341, 2944, 1277, 1071; LRMS (EI)  $m/z$  calculated for  $[\text{M}]$  170.1, found 170.0.

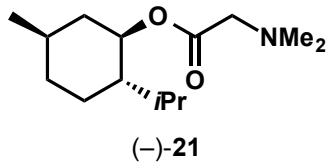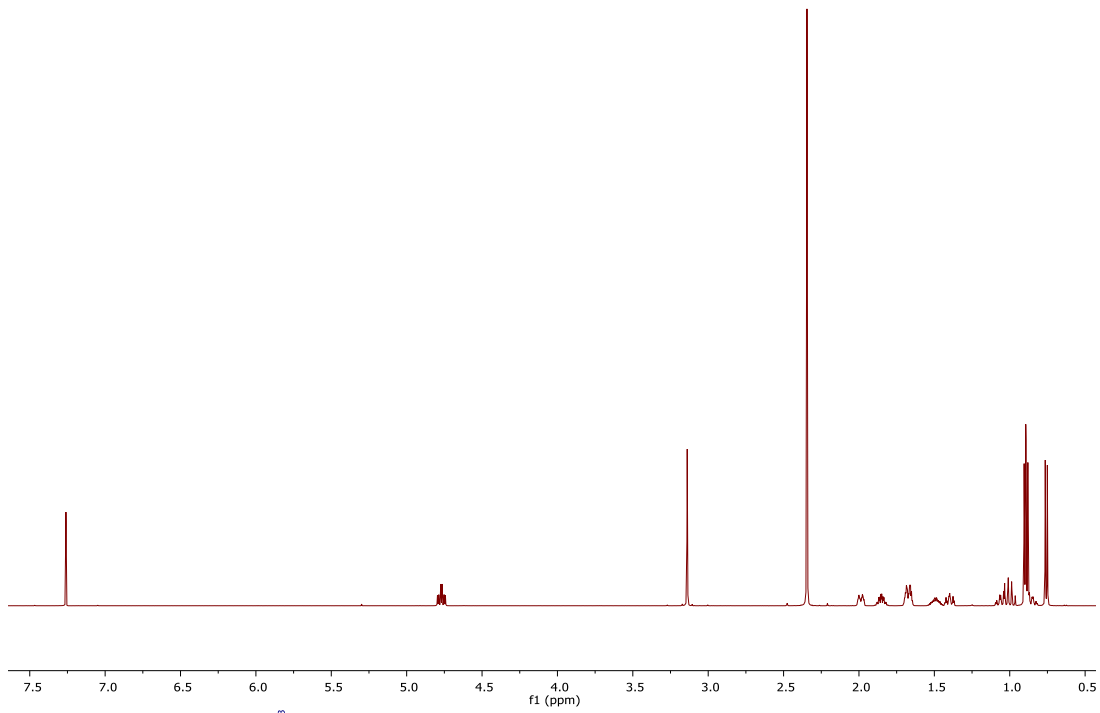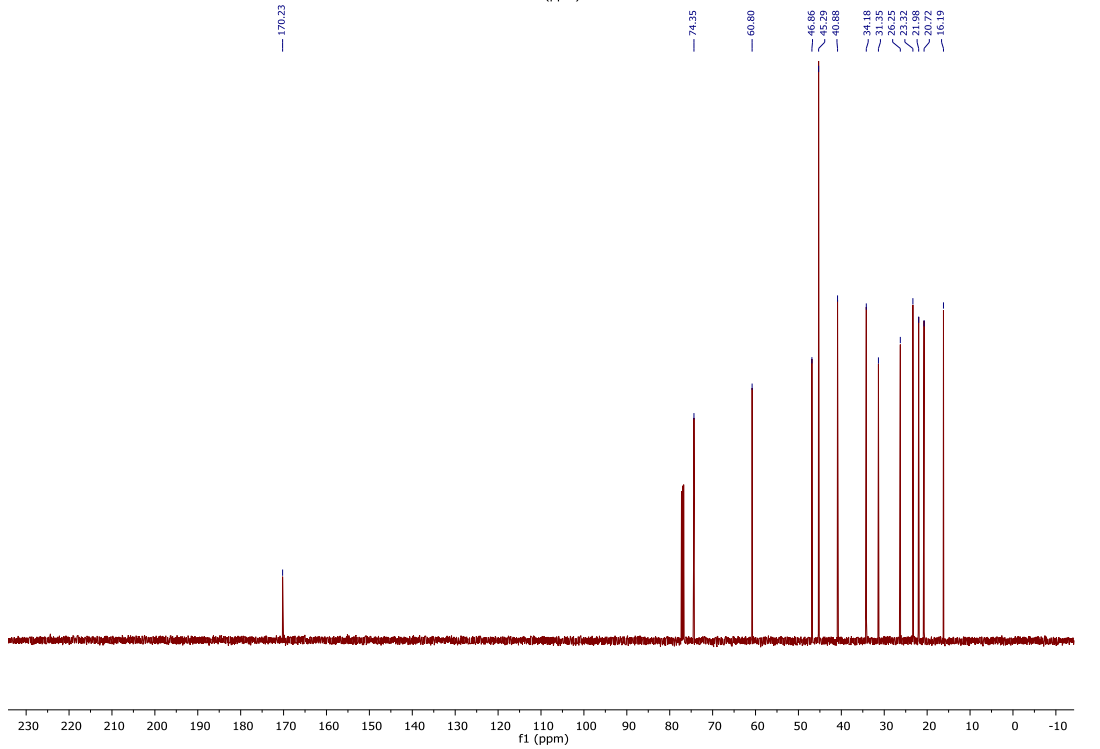

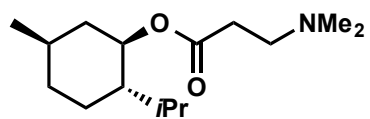

(-)-22

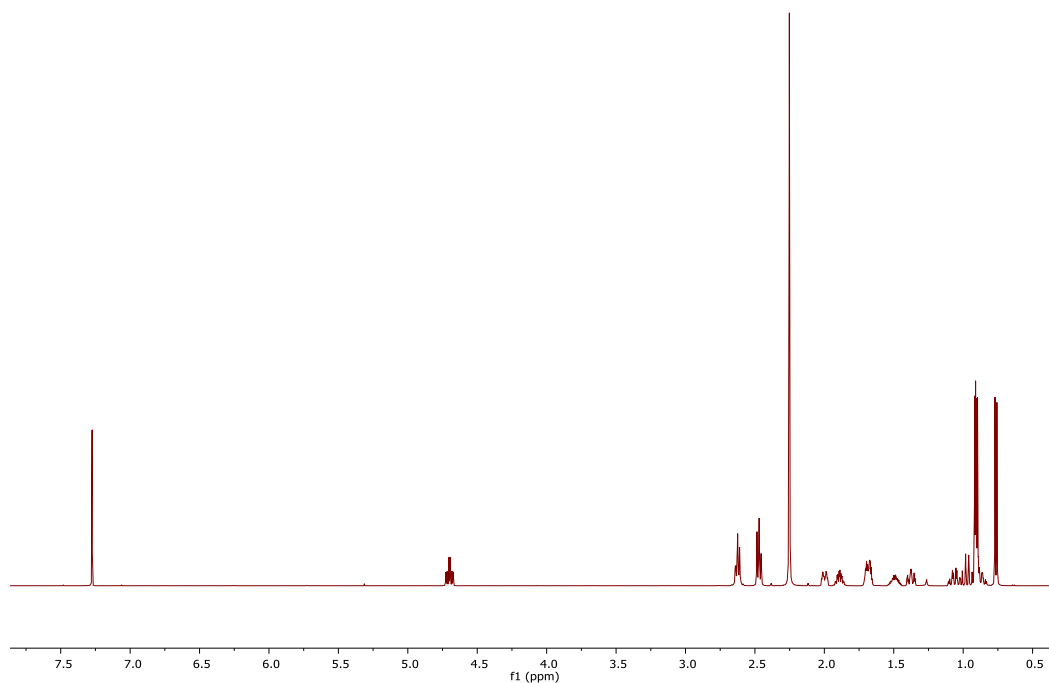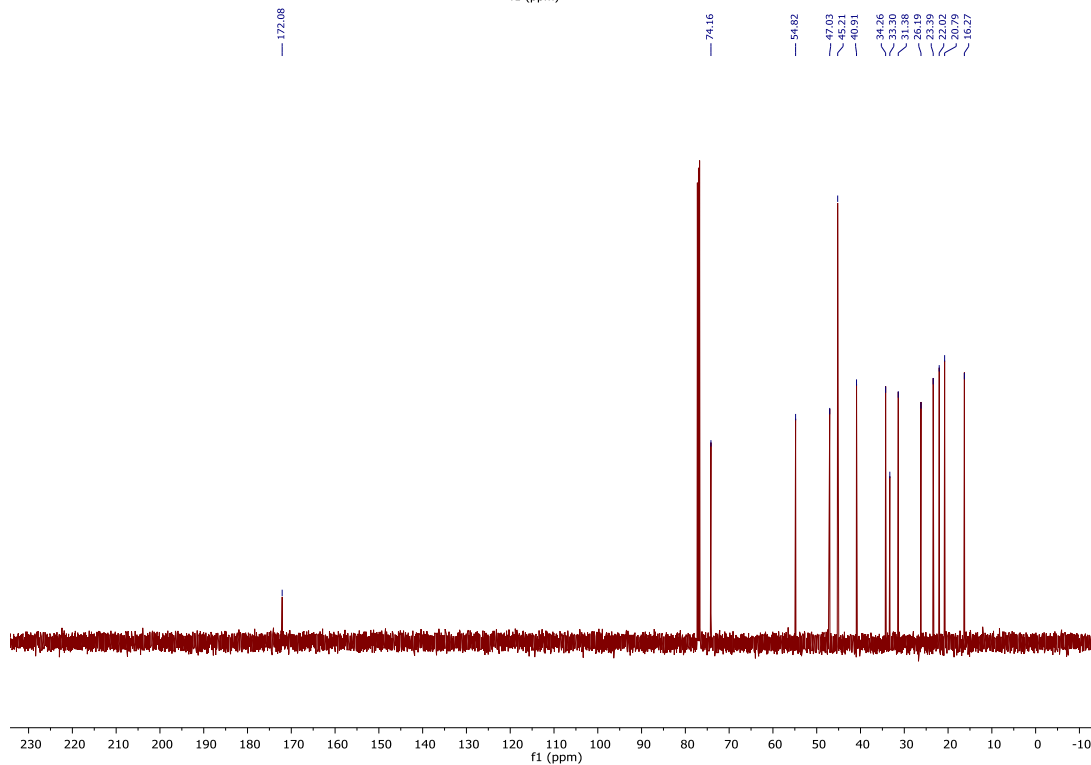

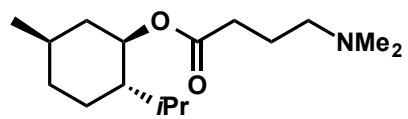

(-)-23

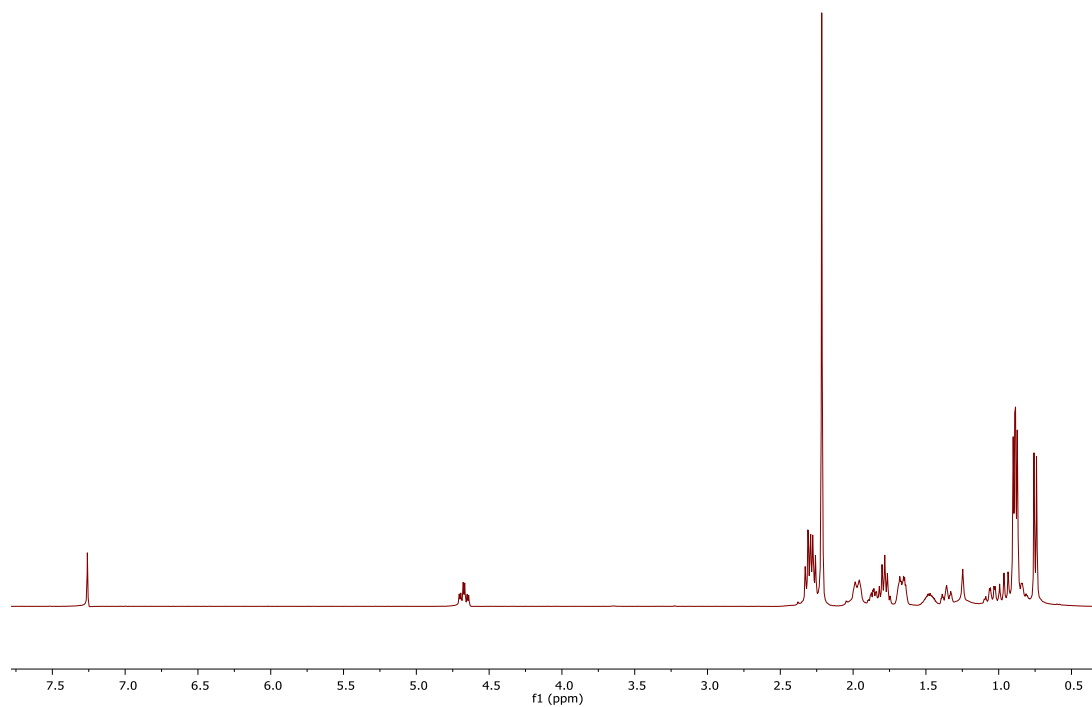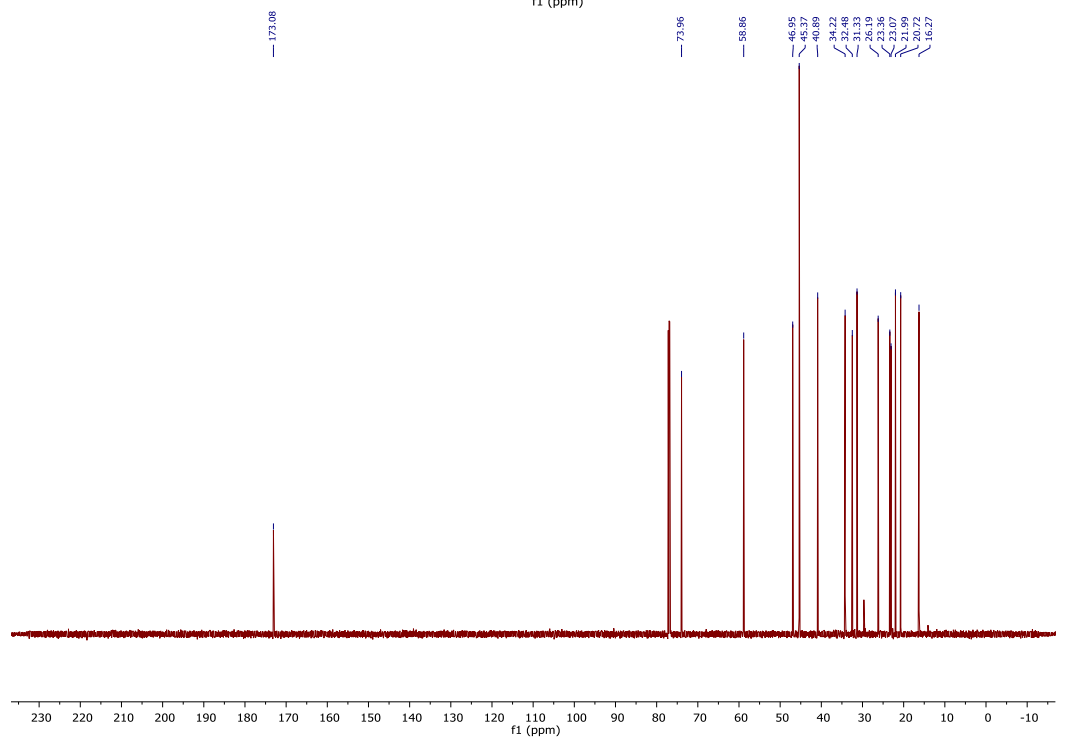

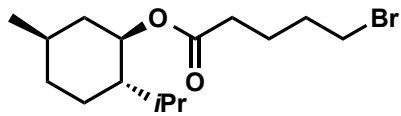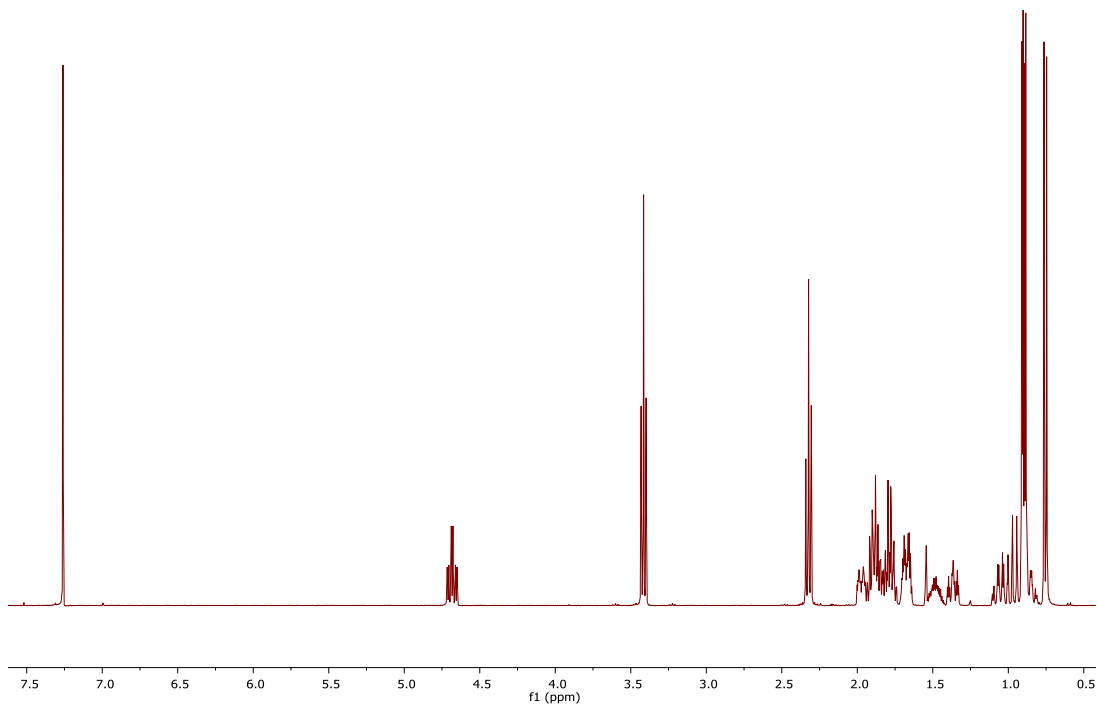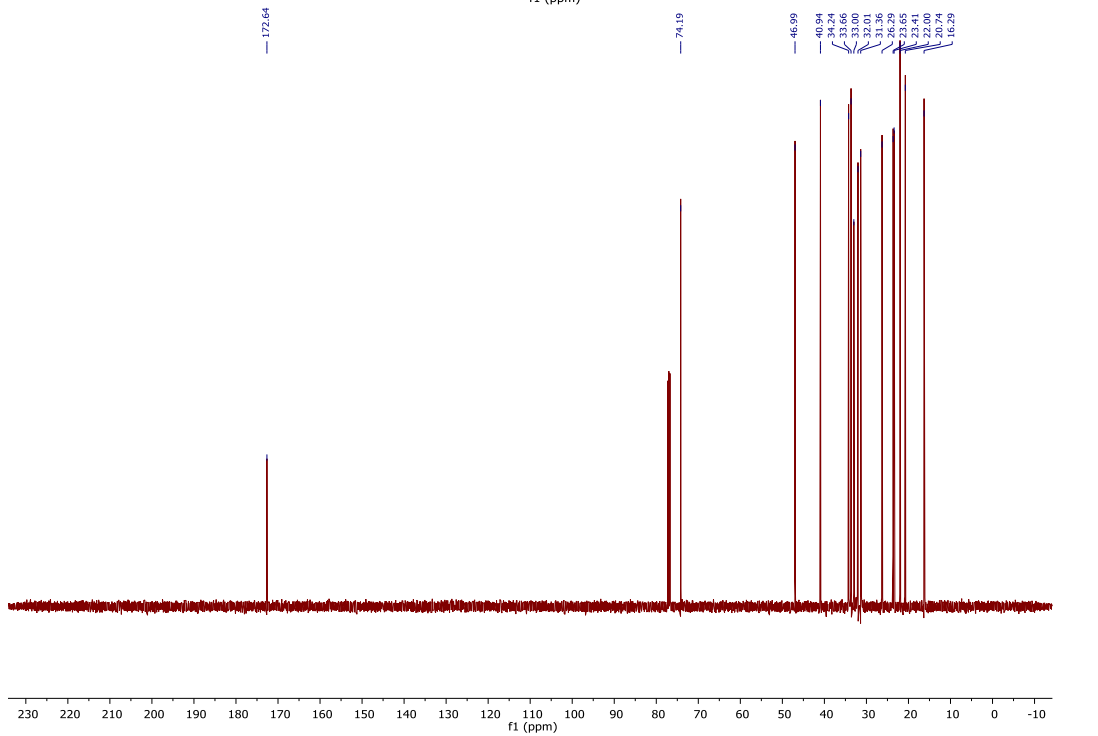





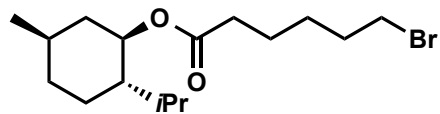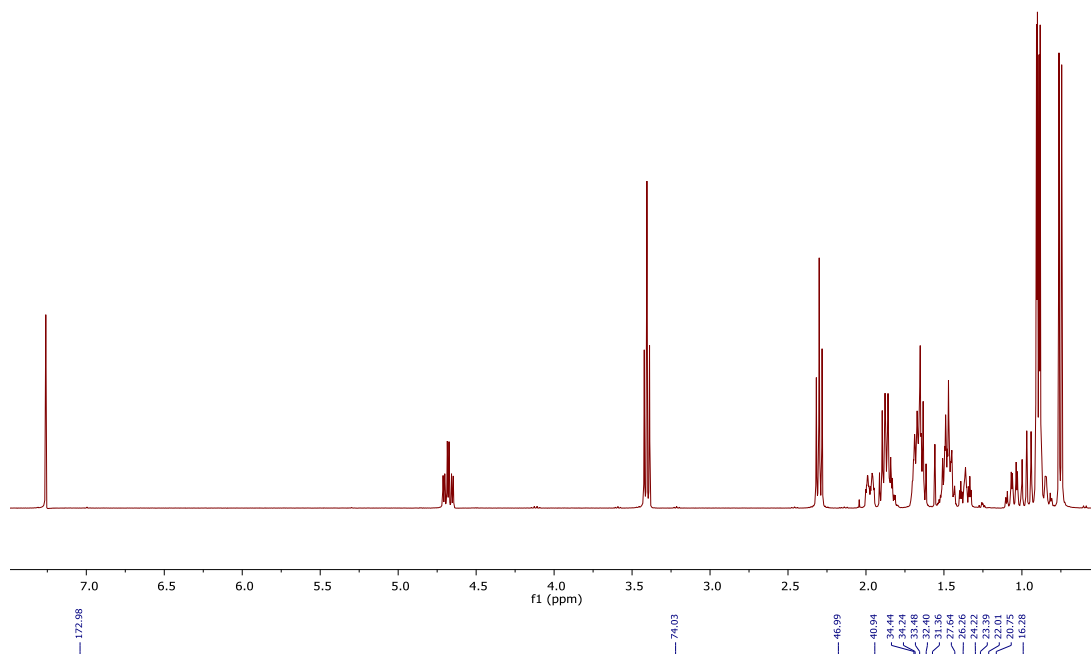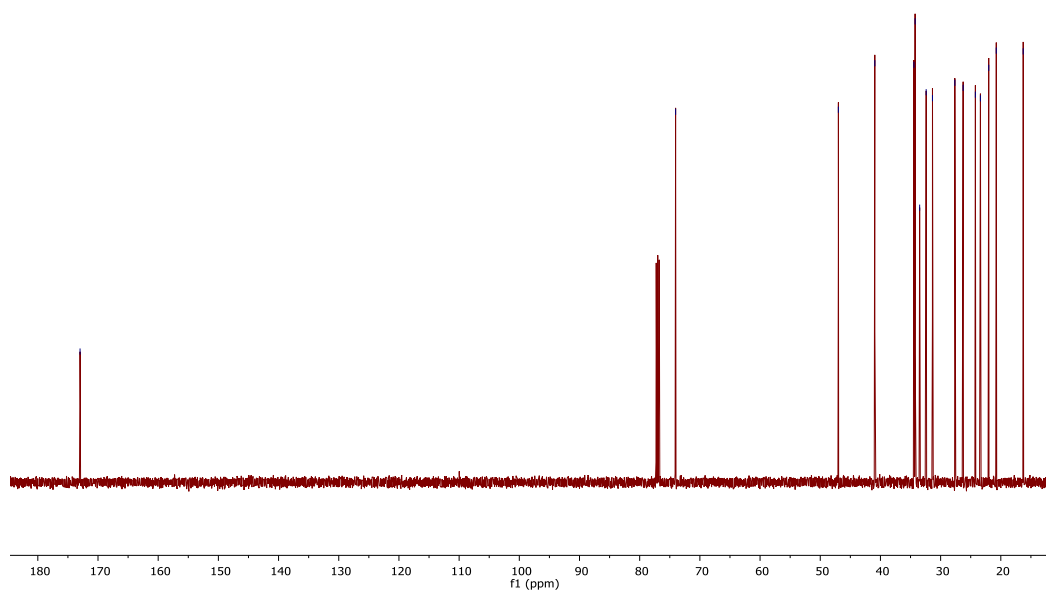

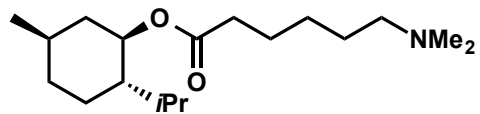

(-)-25

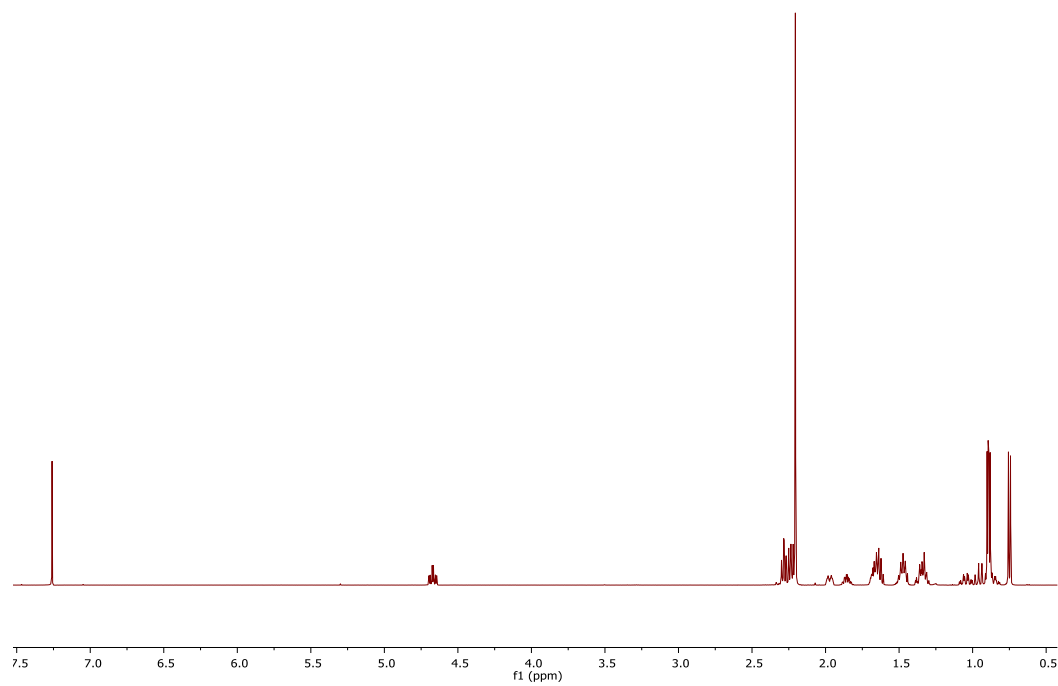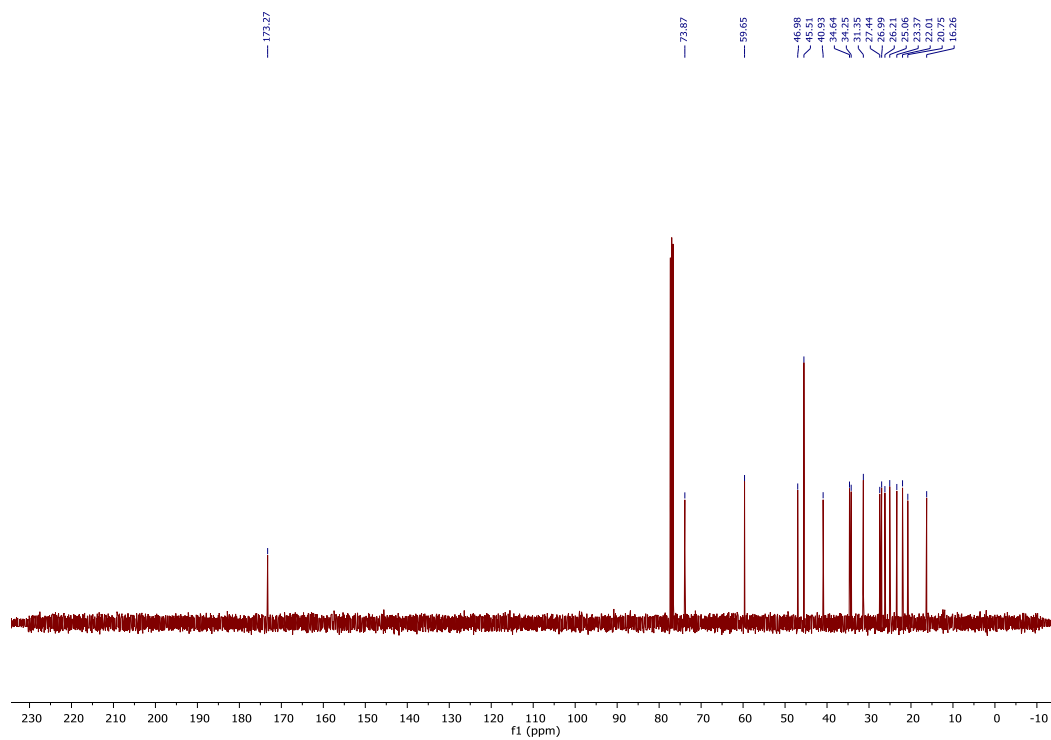

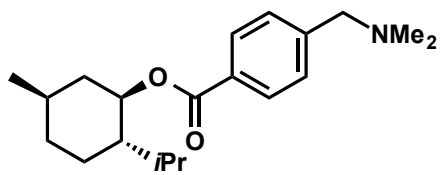

(-)-26

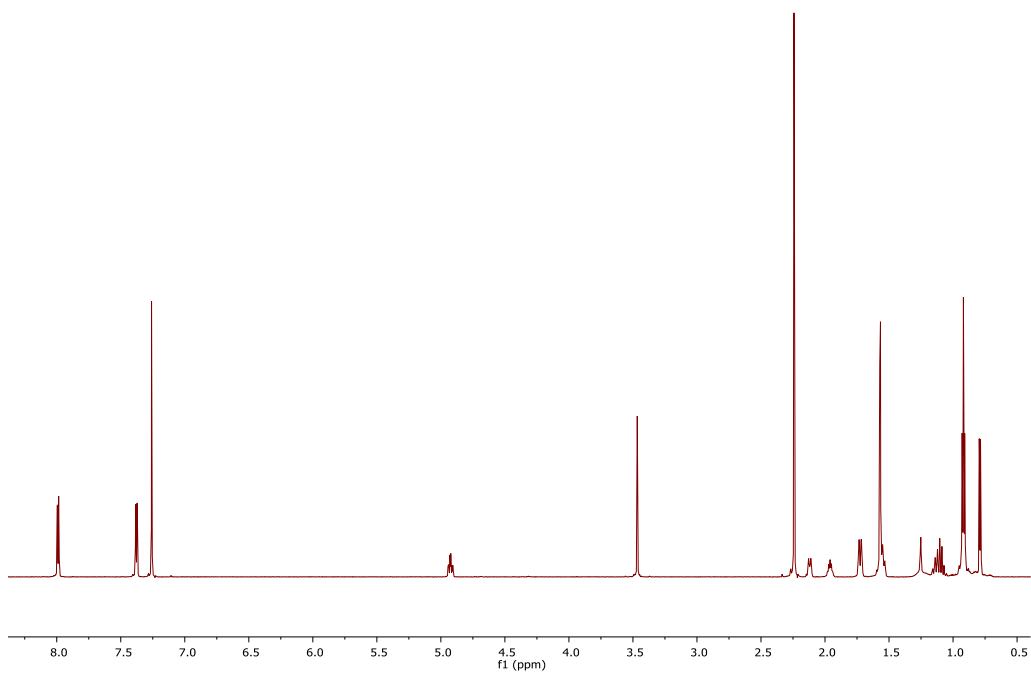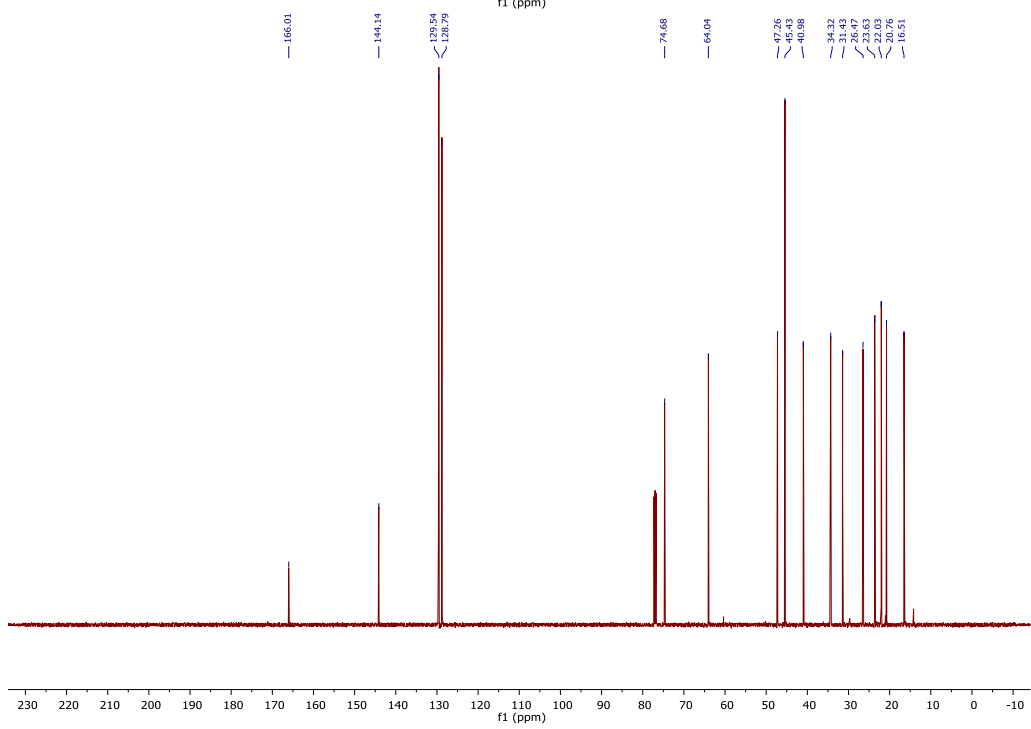

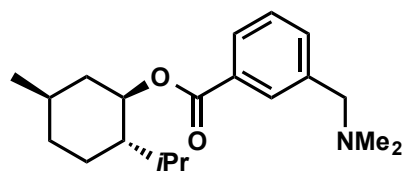

(-)-27

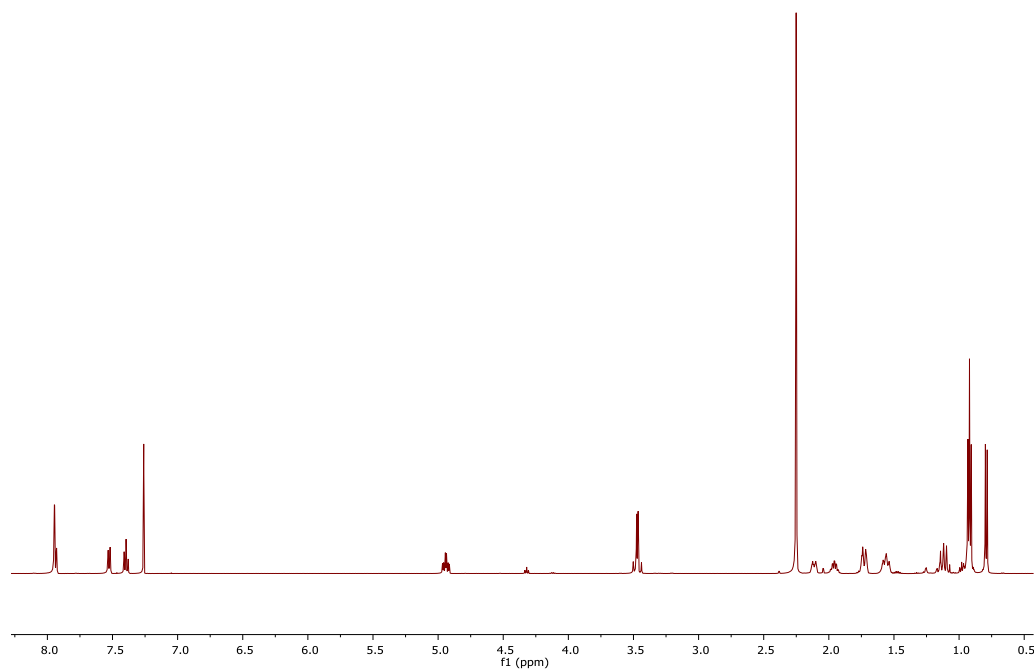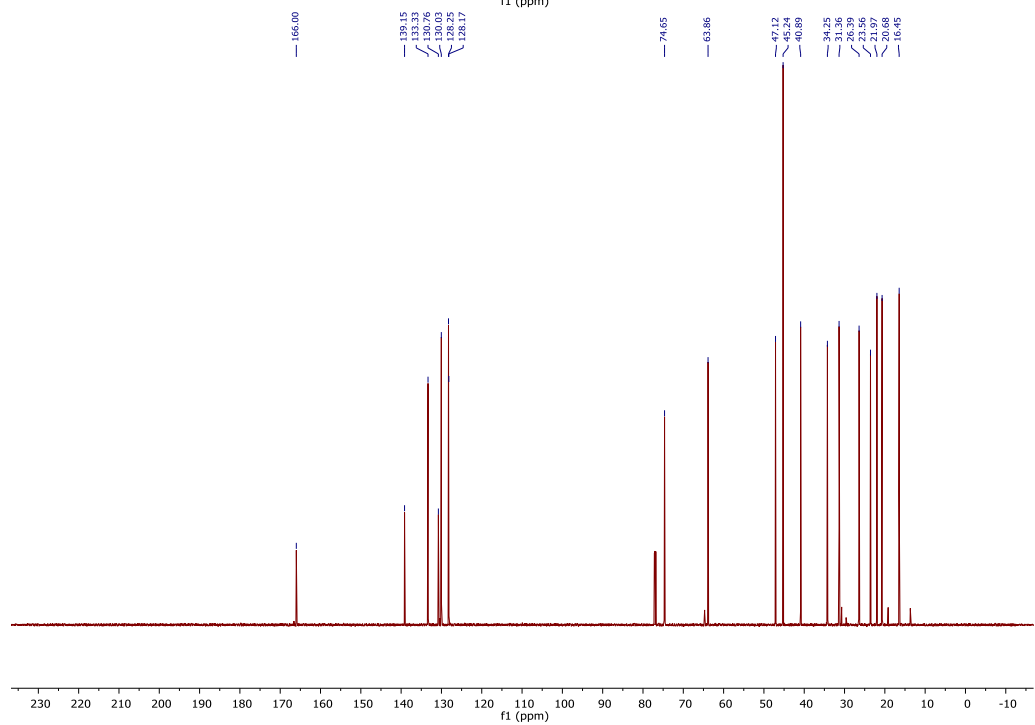

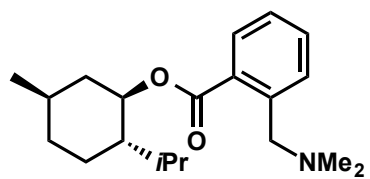

(-)-28

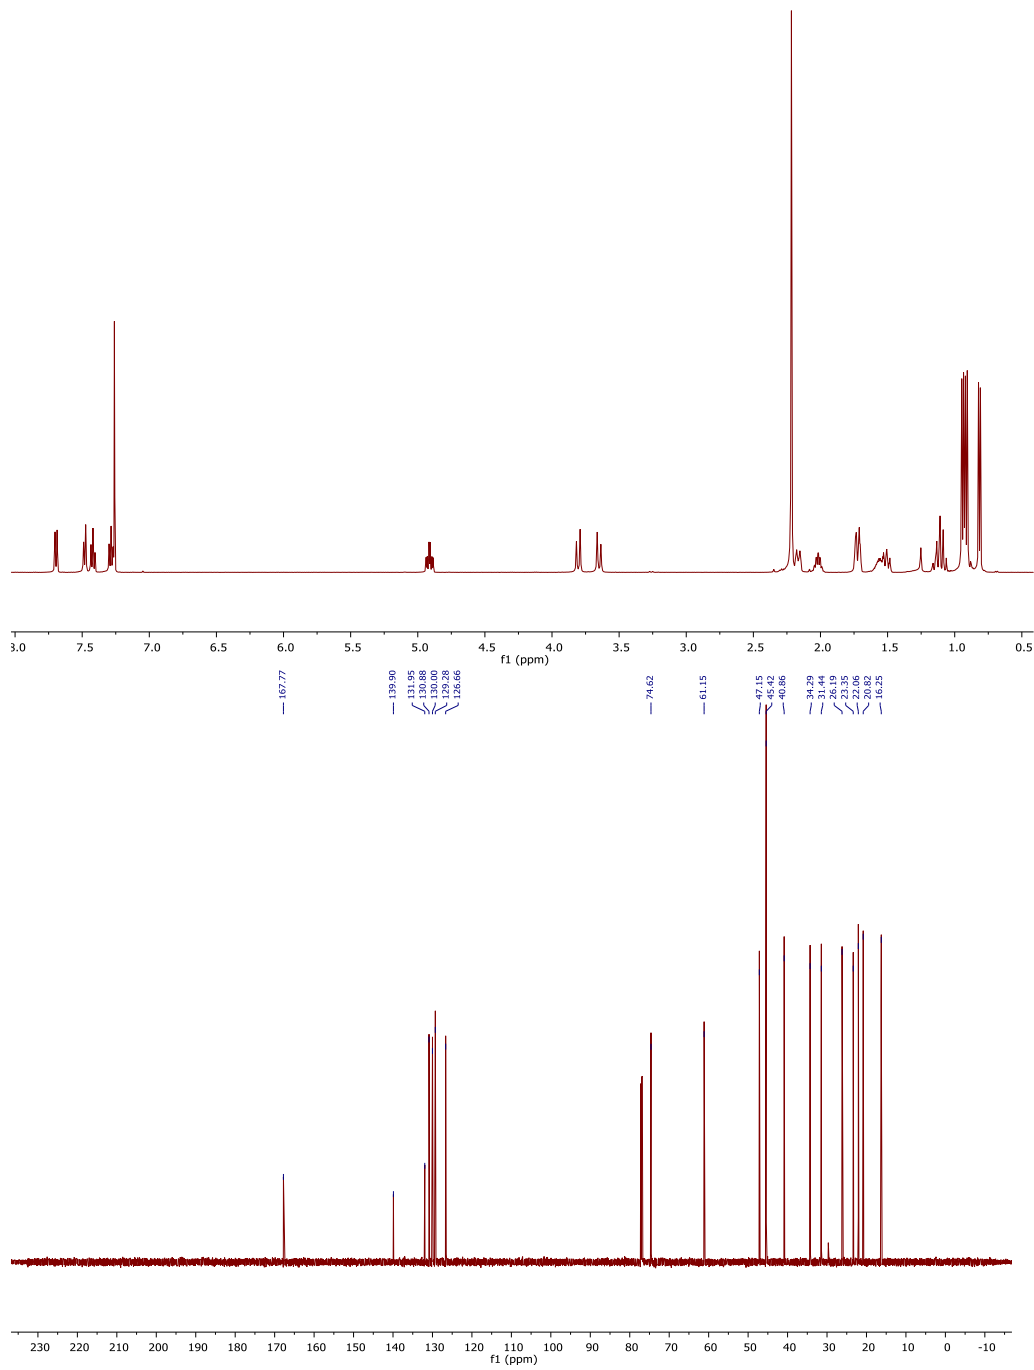

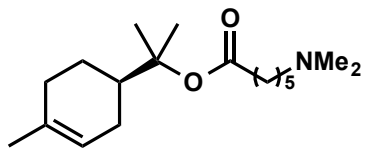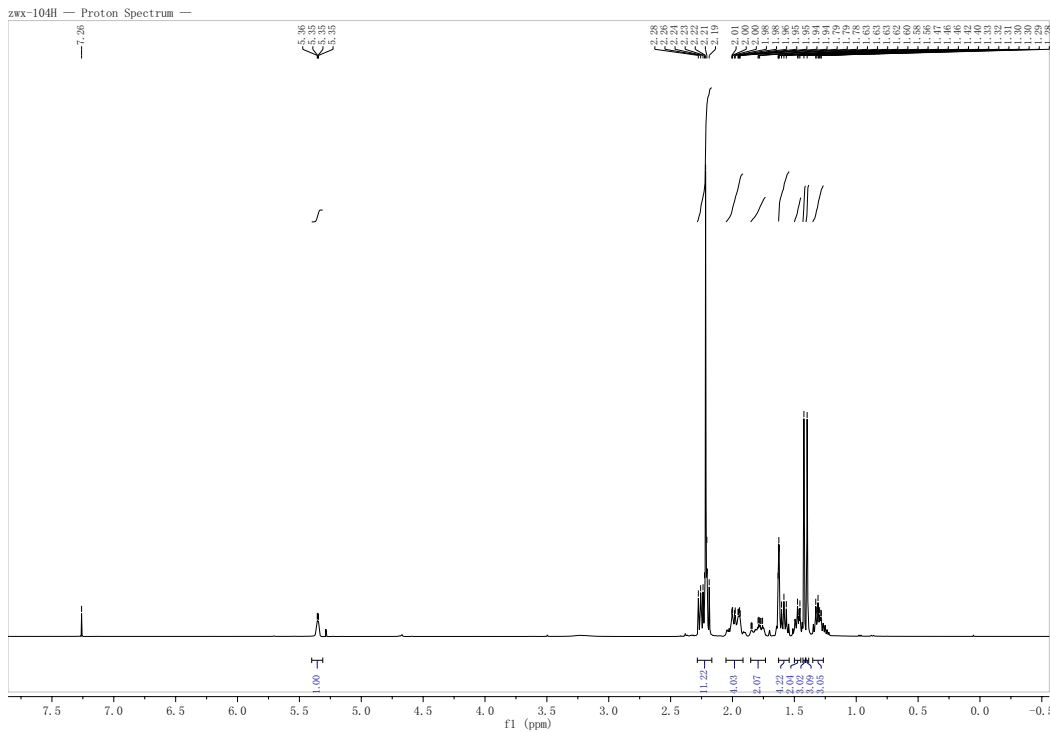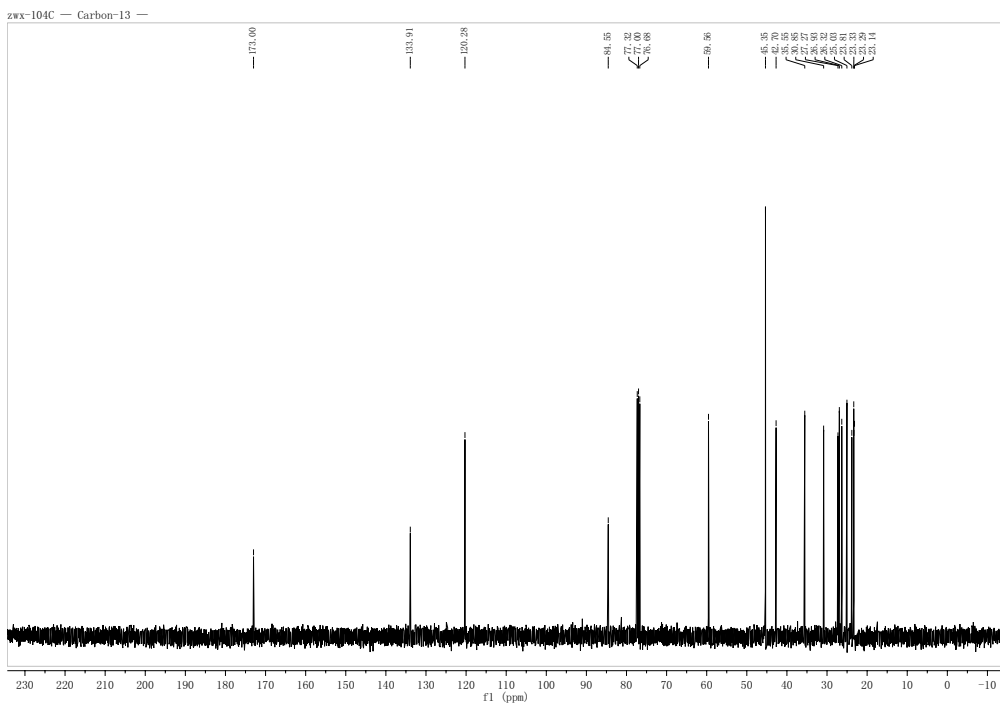

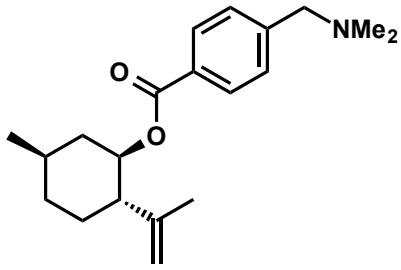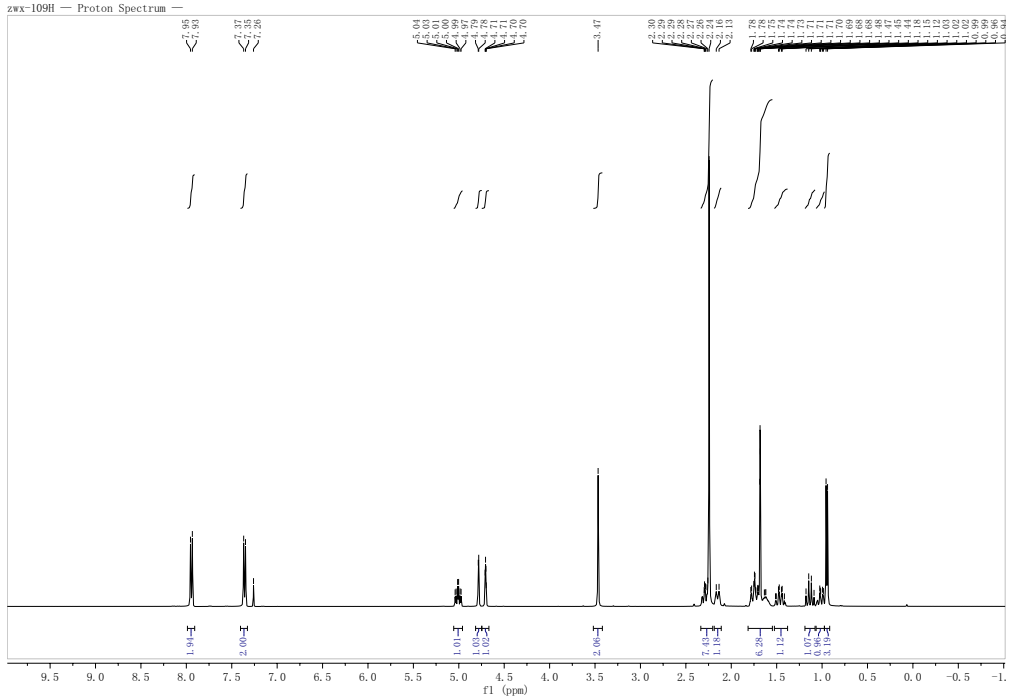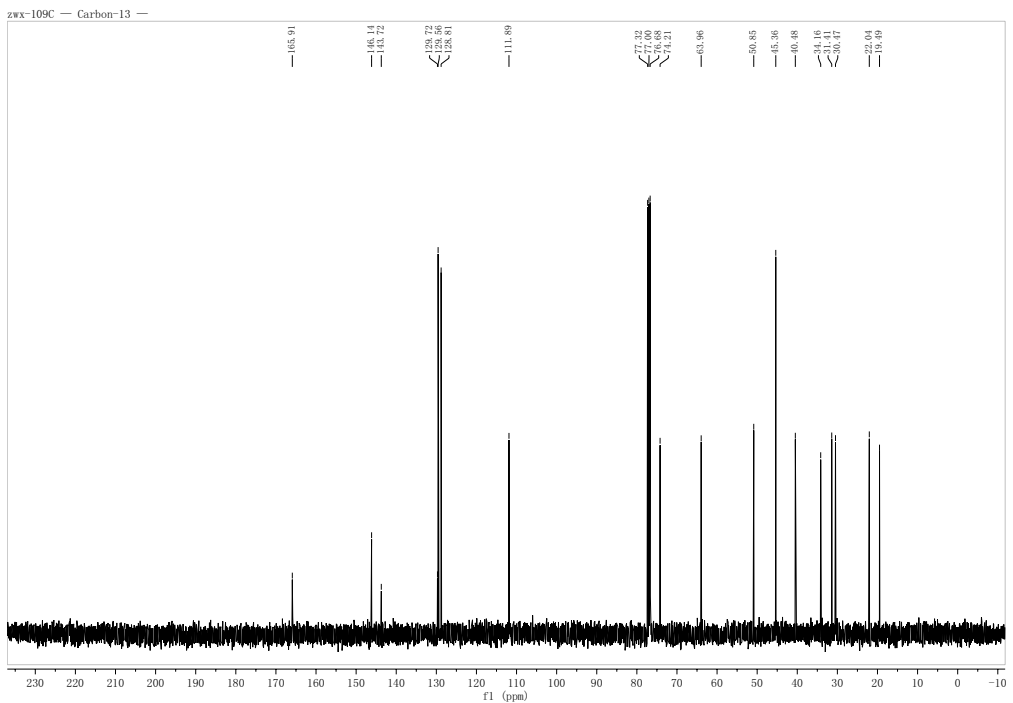

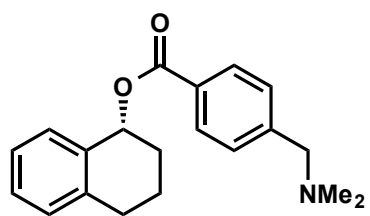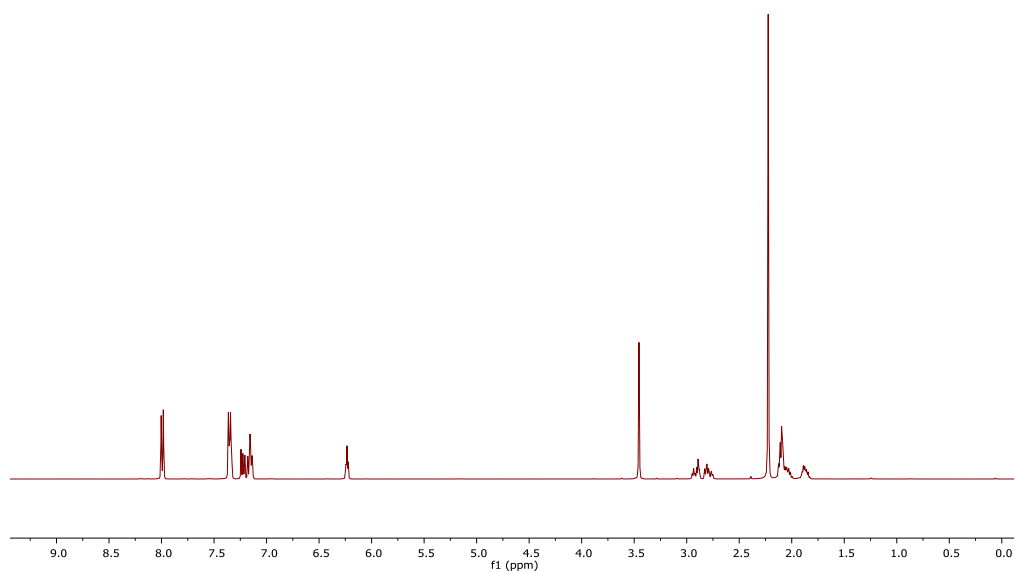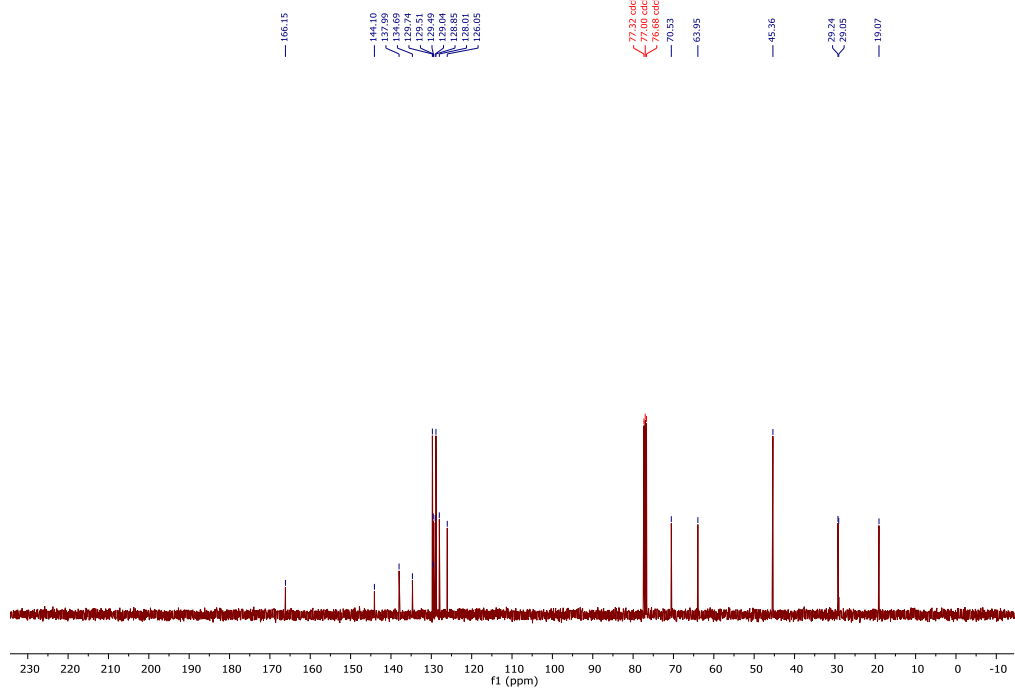



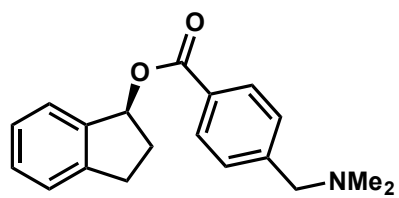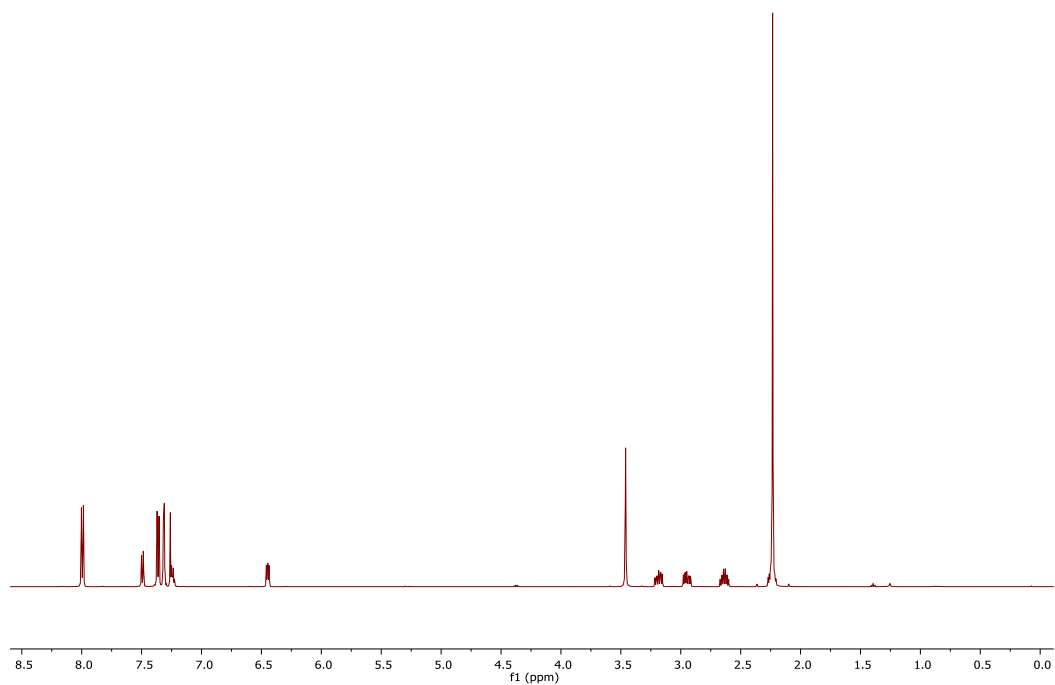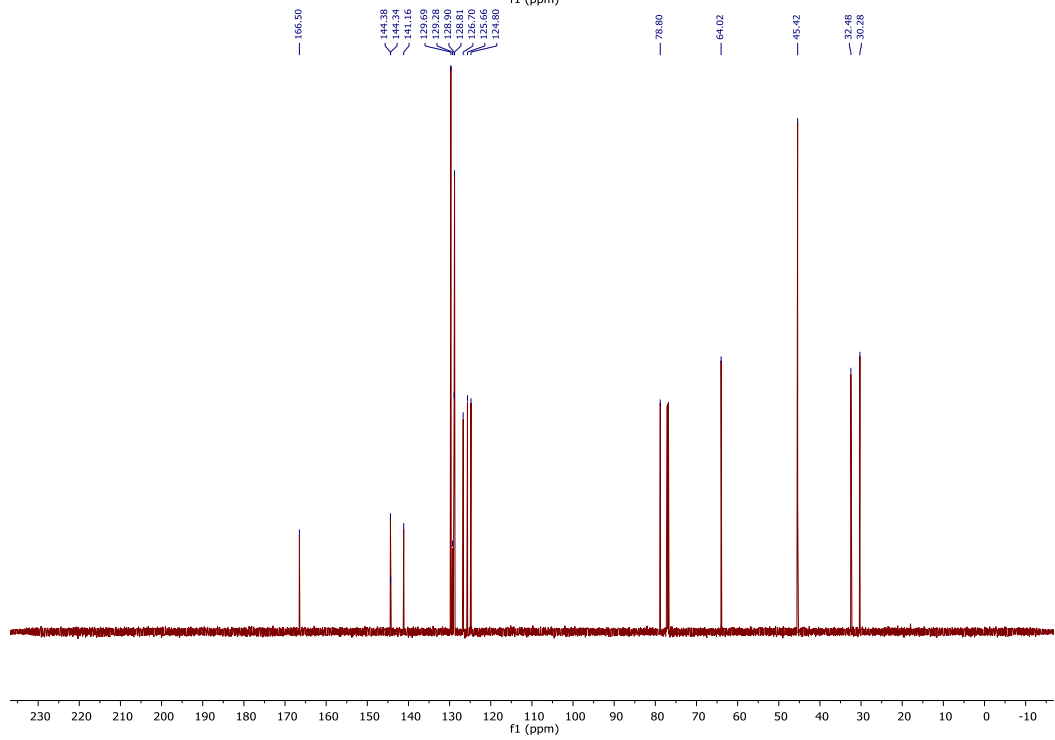

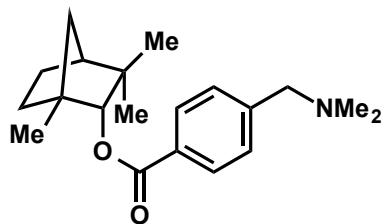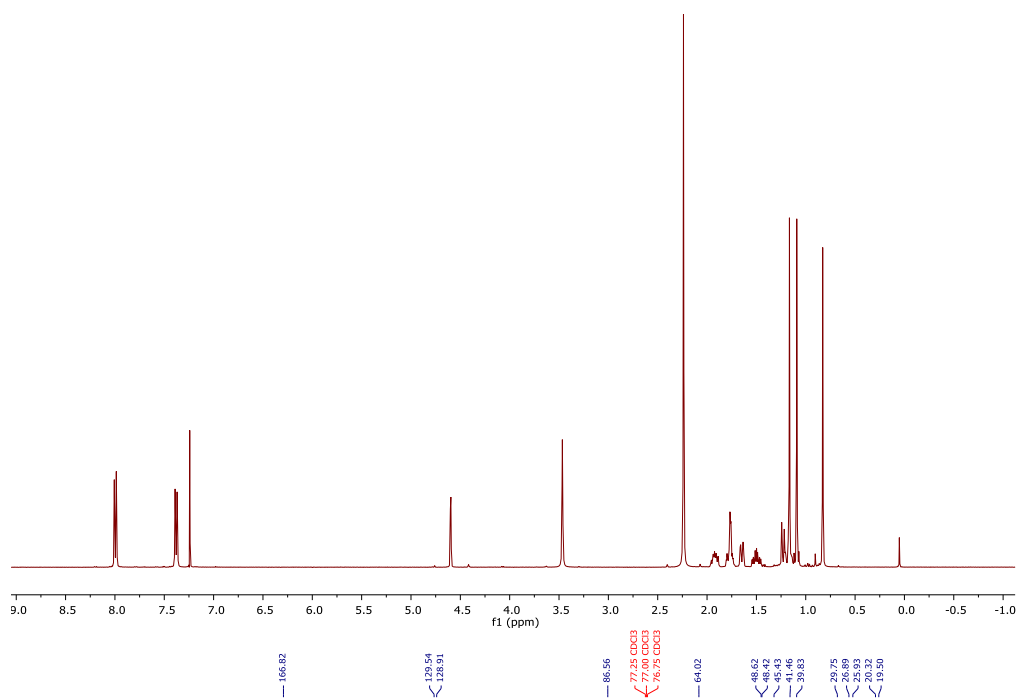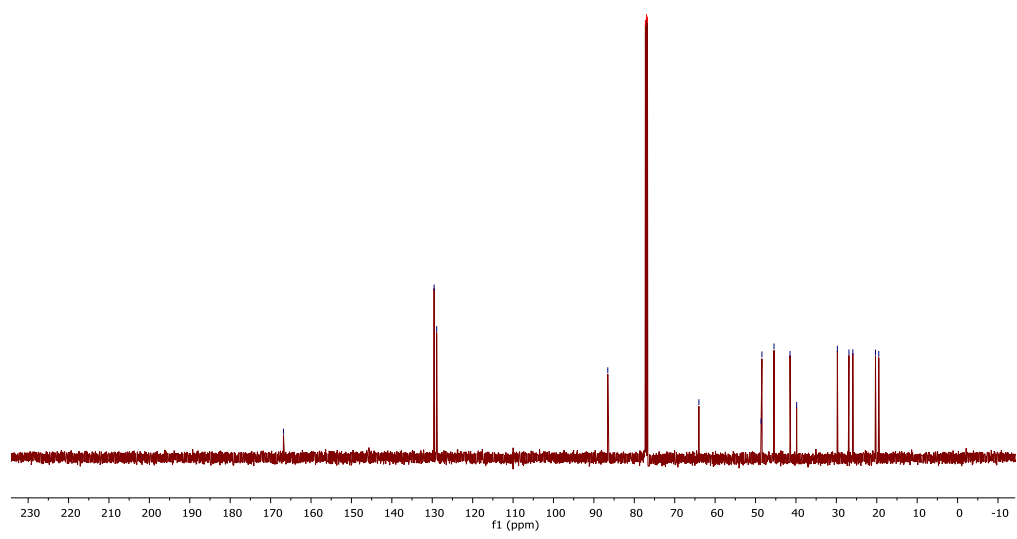

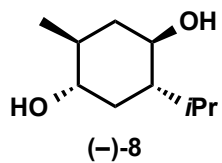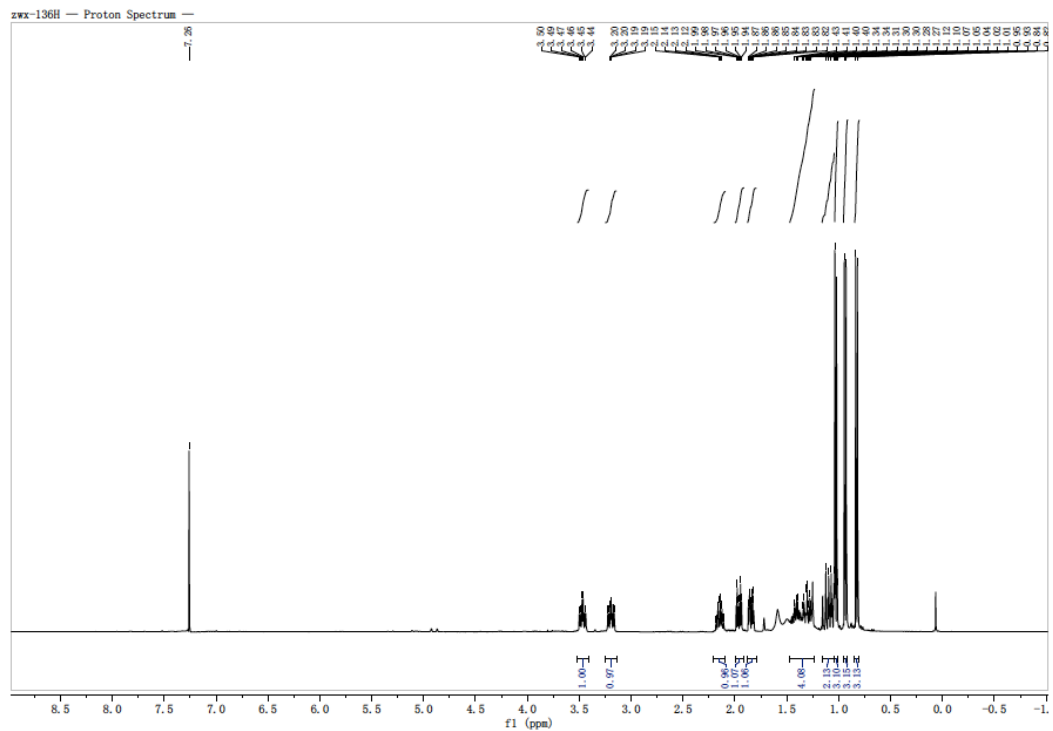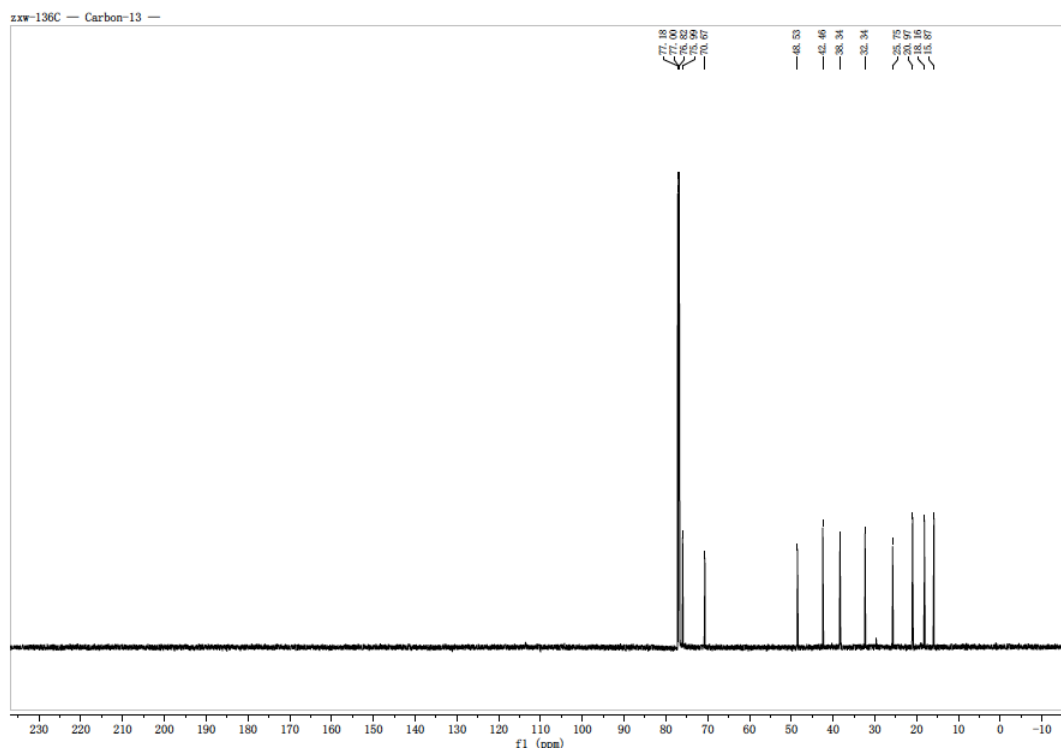

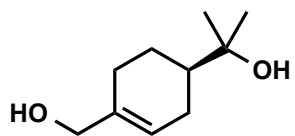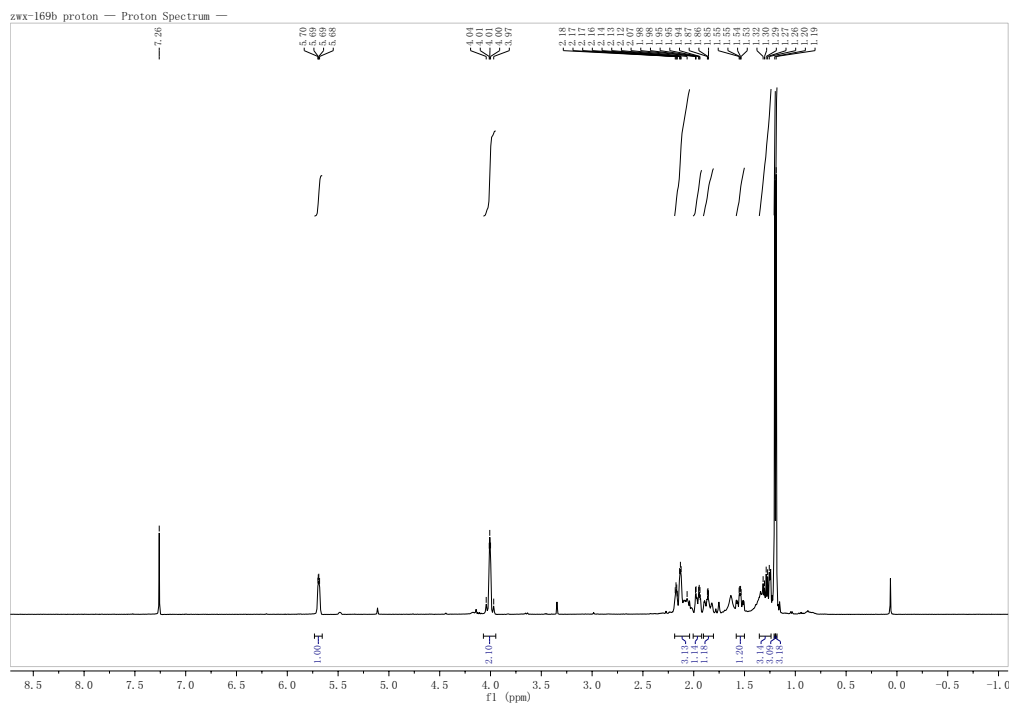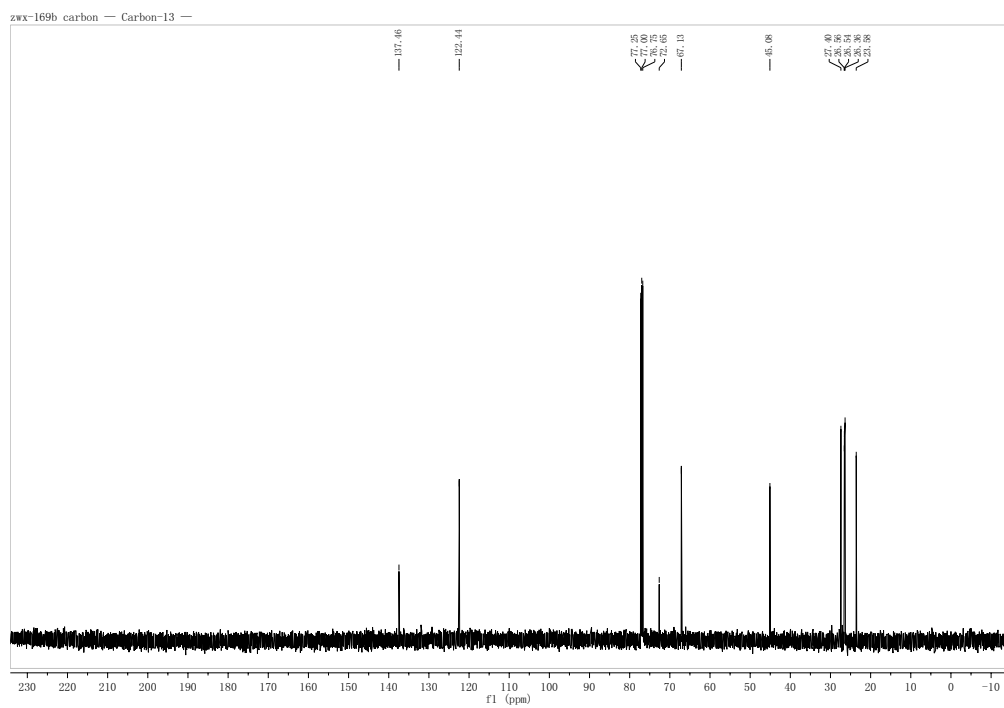

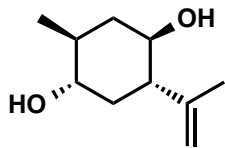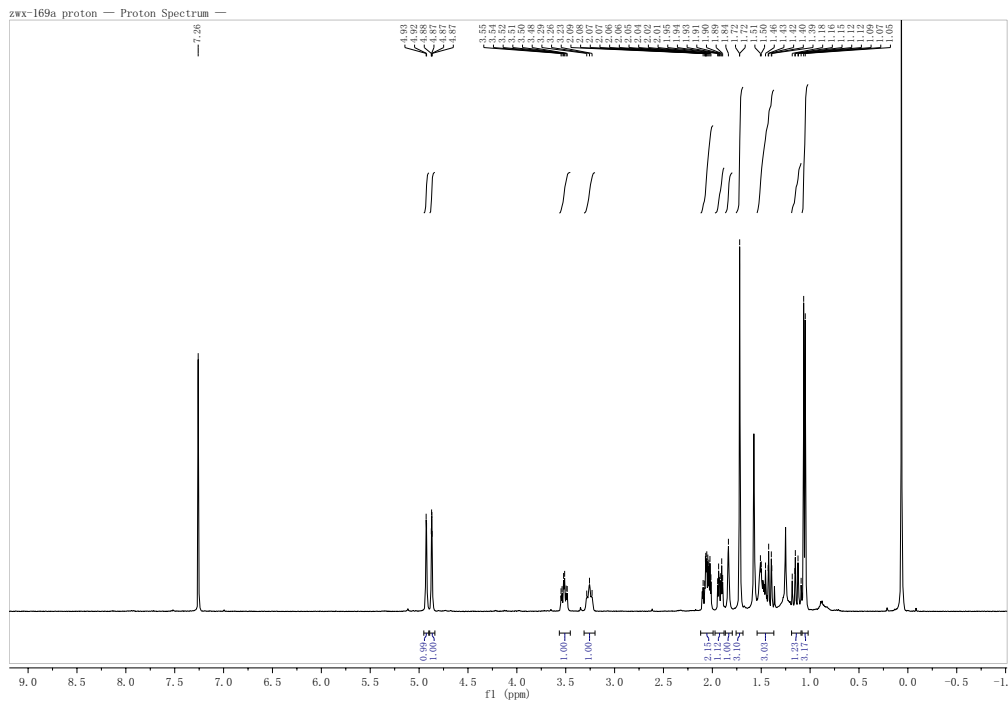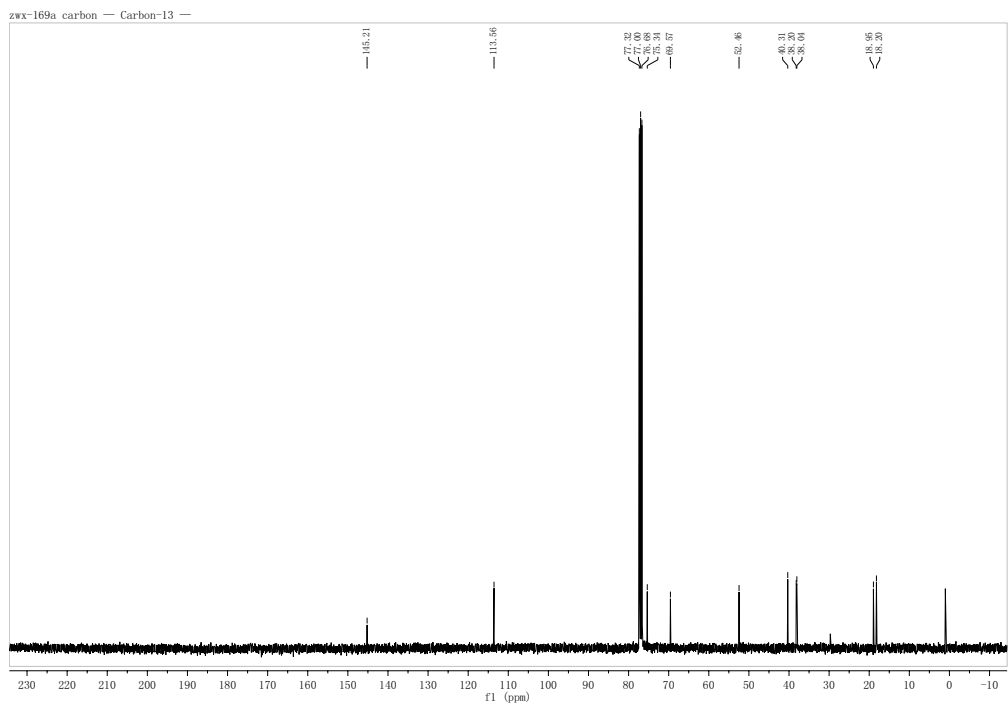



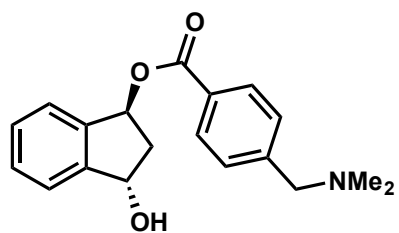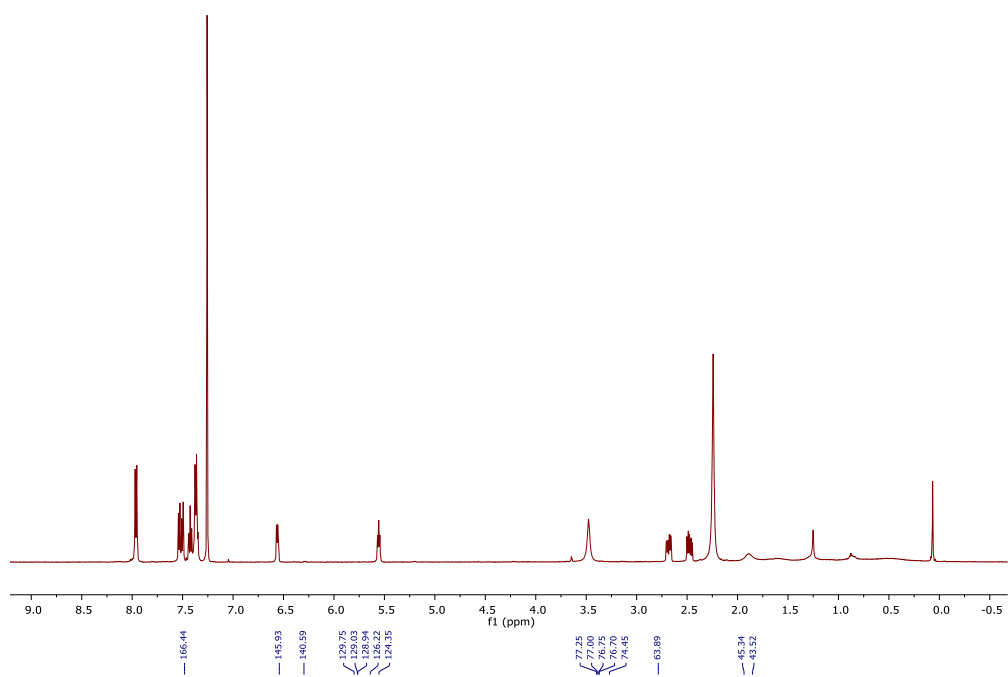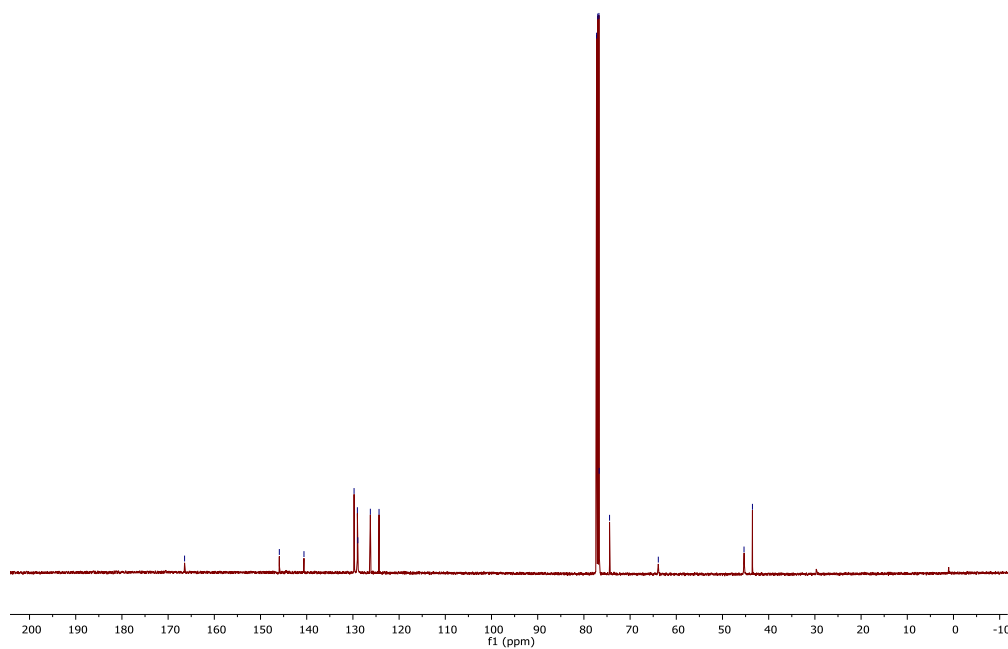

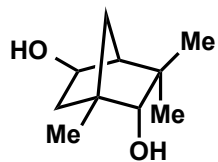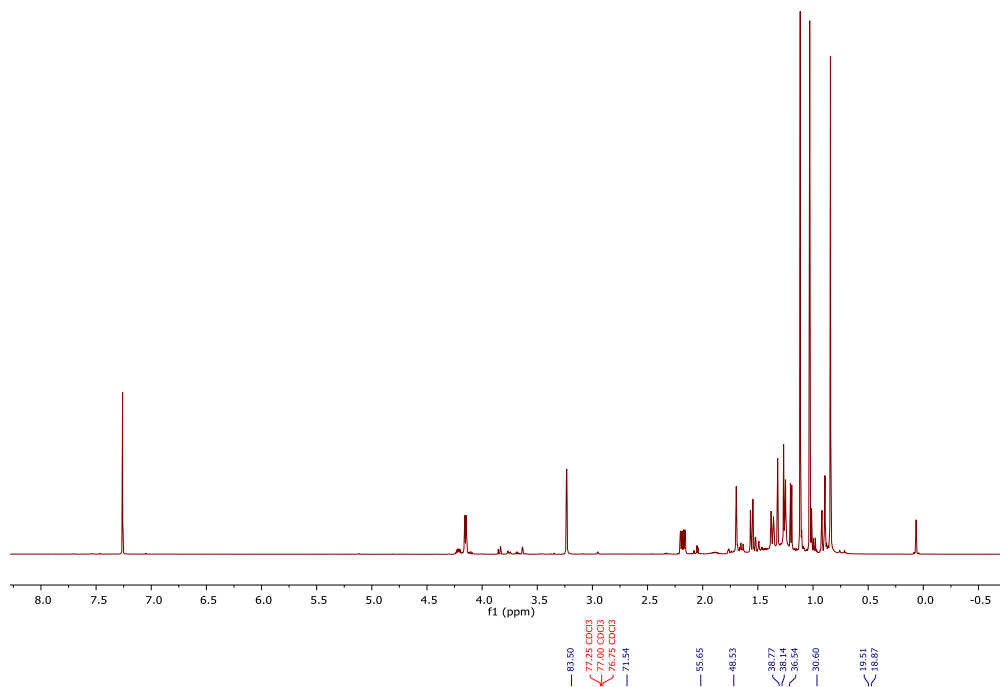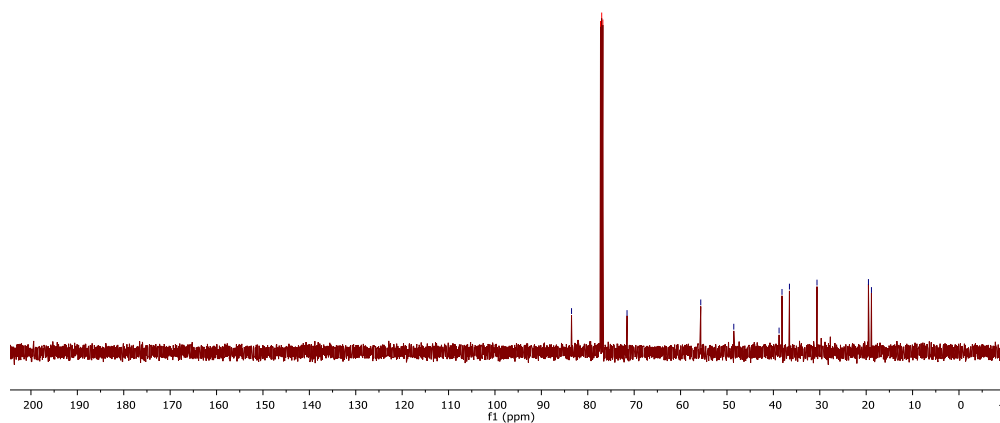



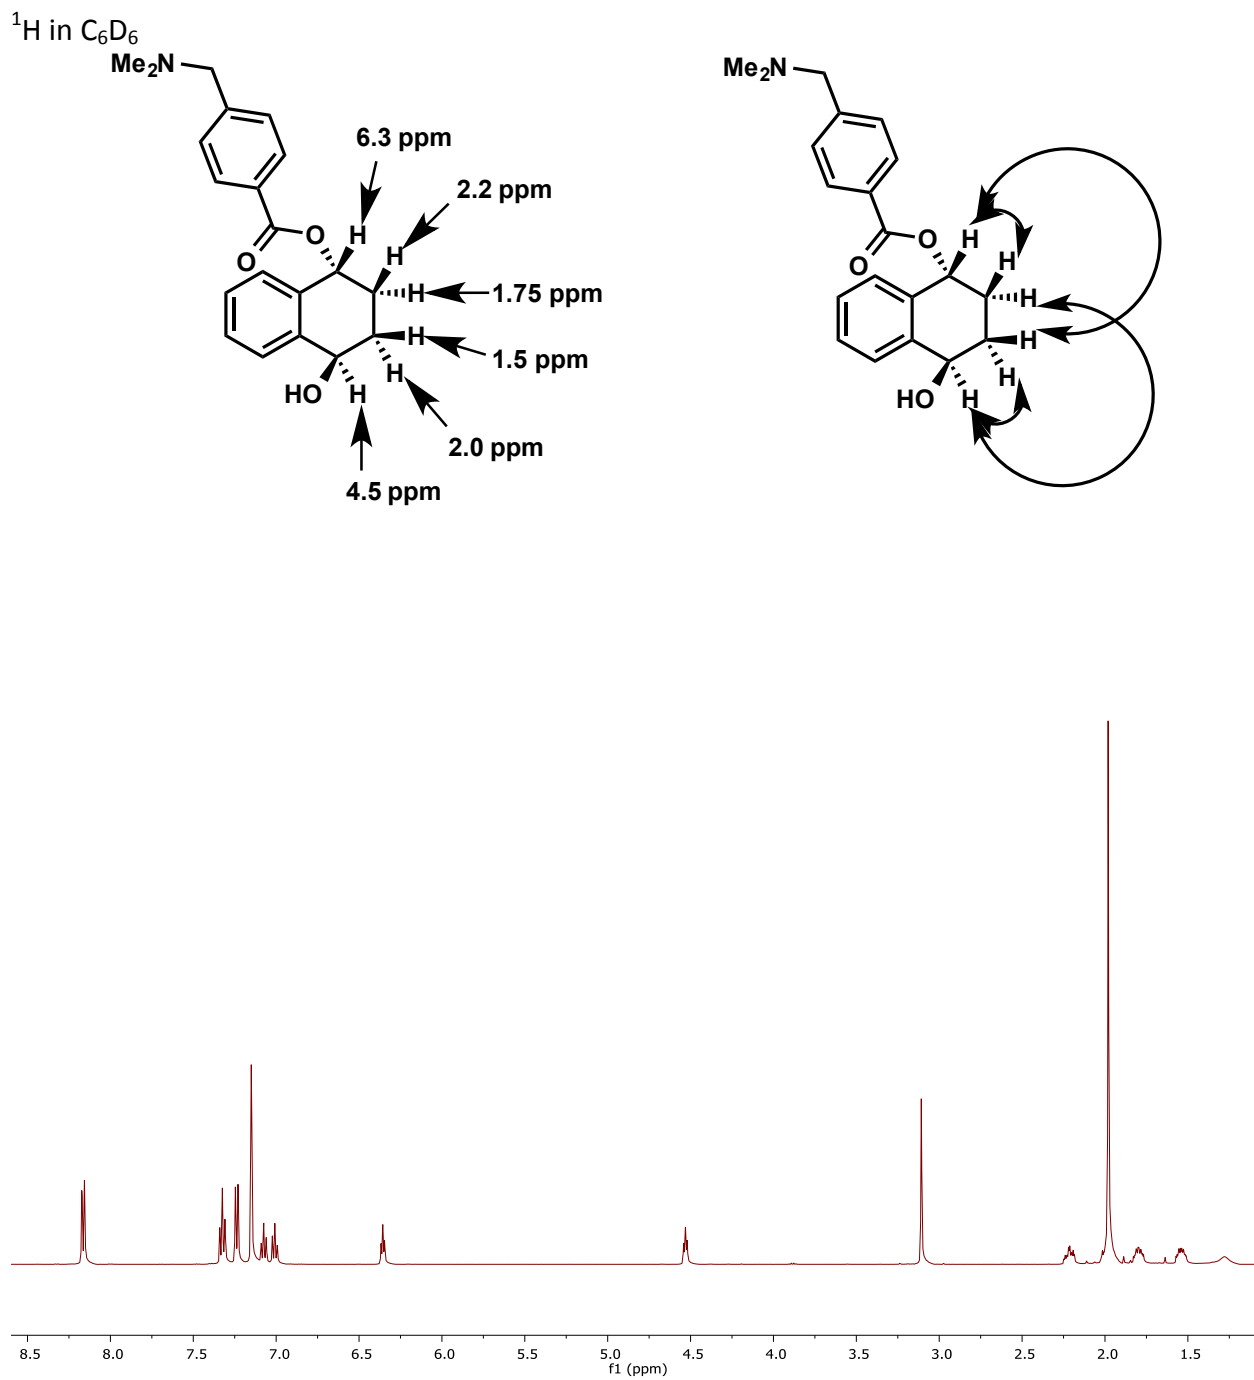

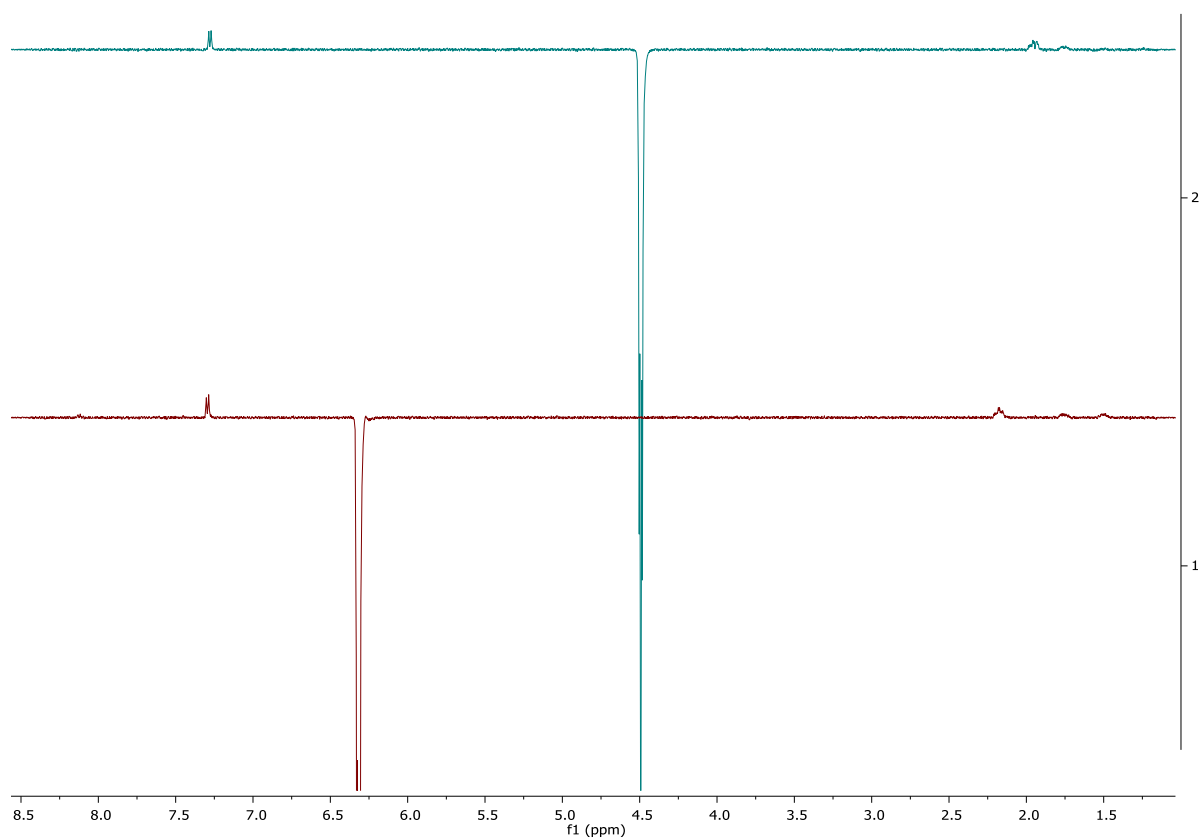

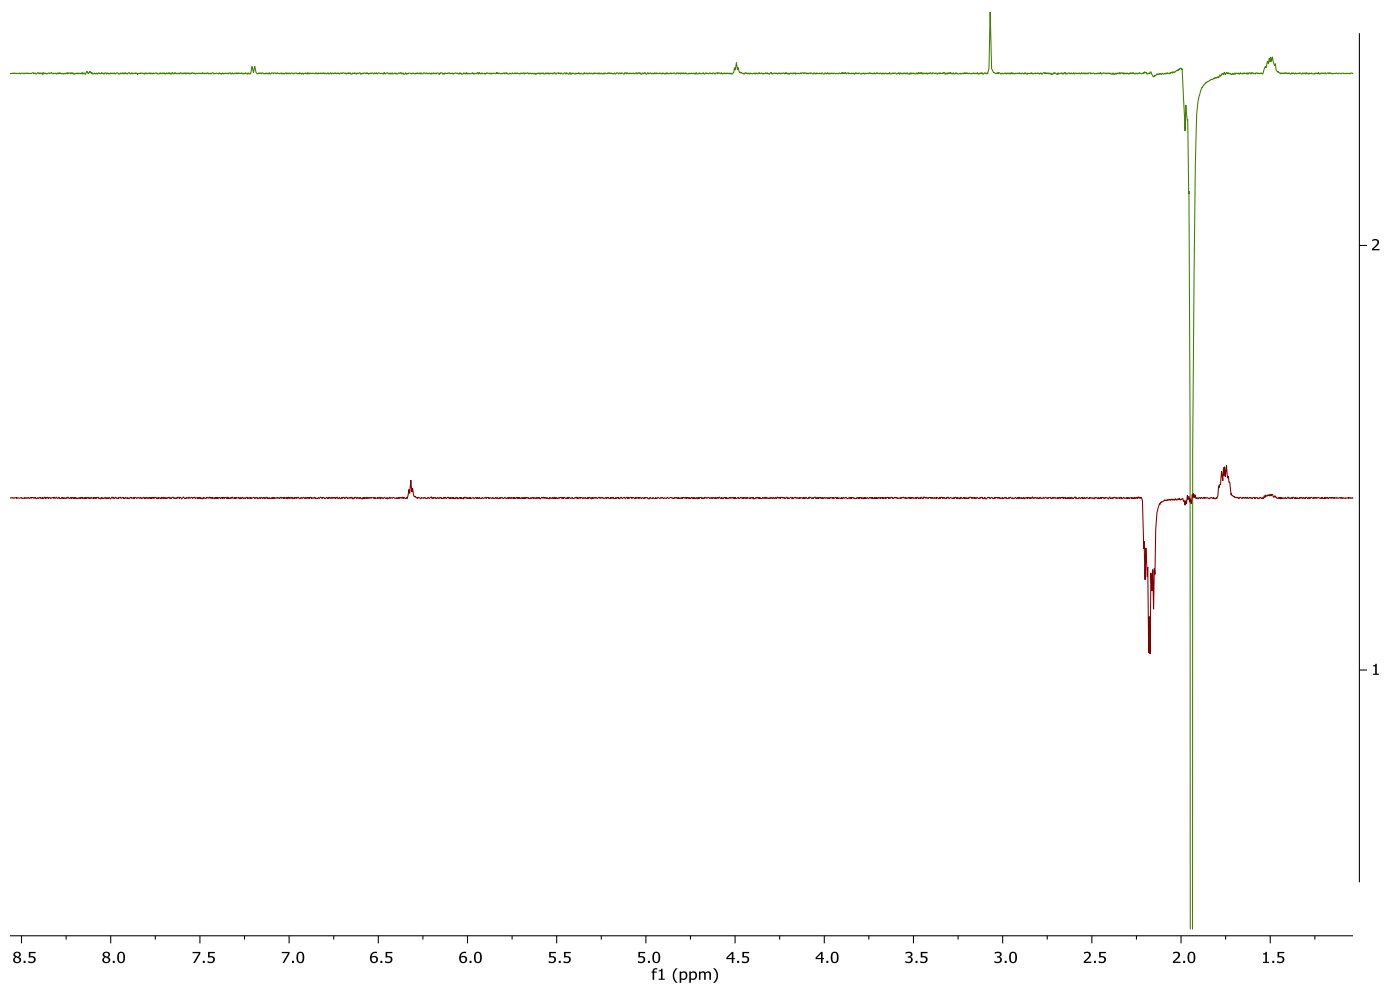

Selected NOEs CDCl<sub>3</sub>

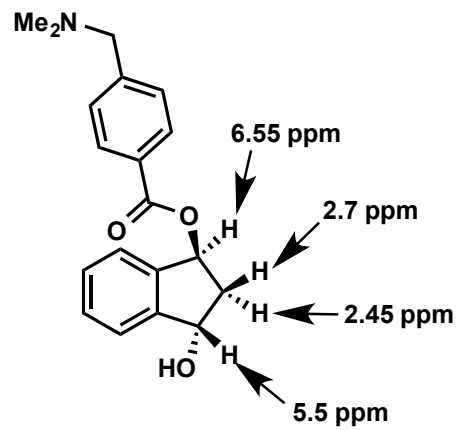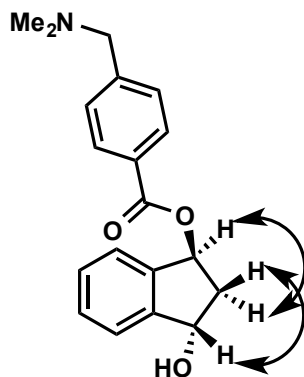

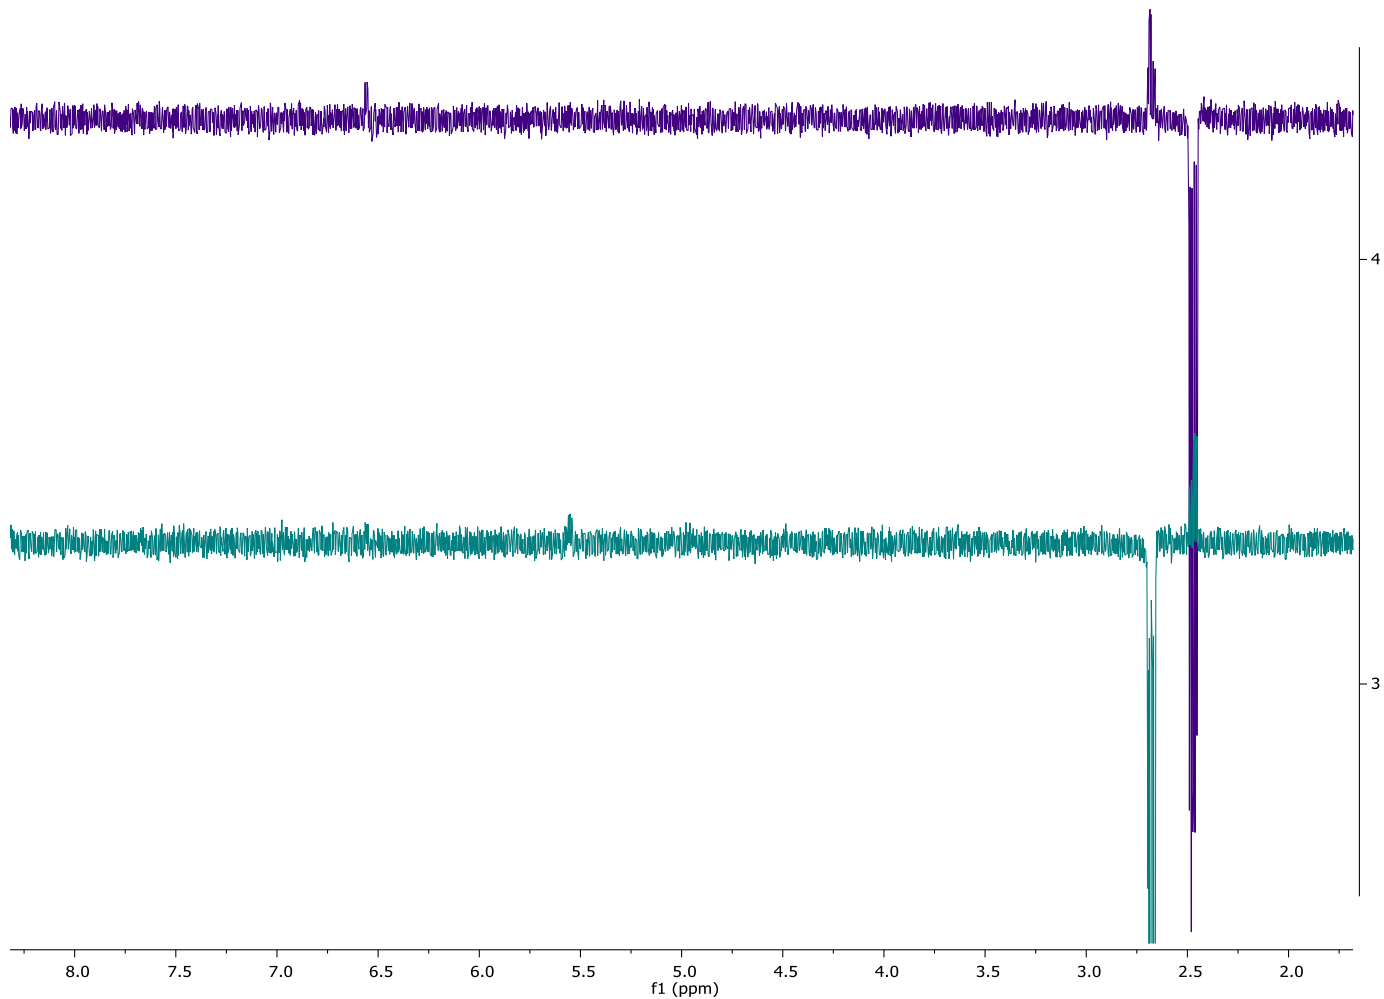

ARN-IX-204  
 COSY, HMQC in CDCl<sub>3</sub>

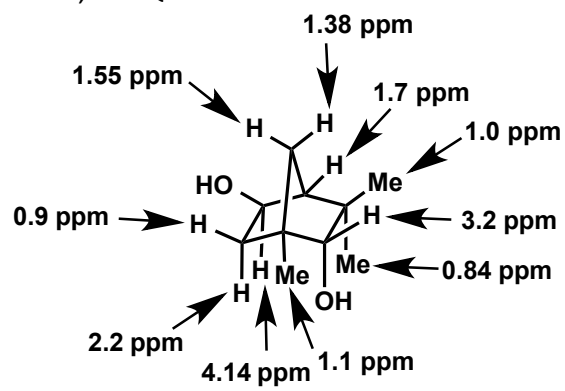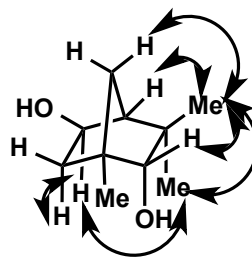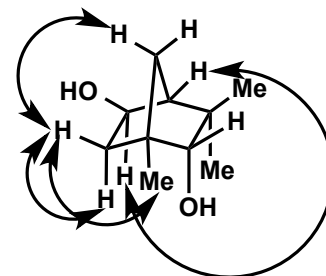

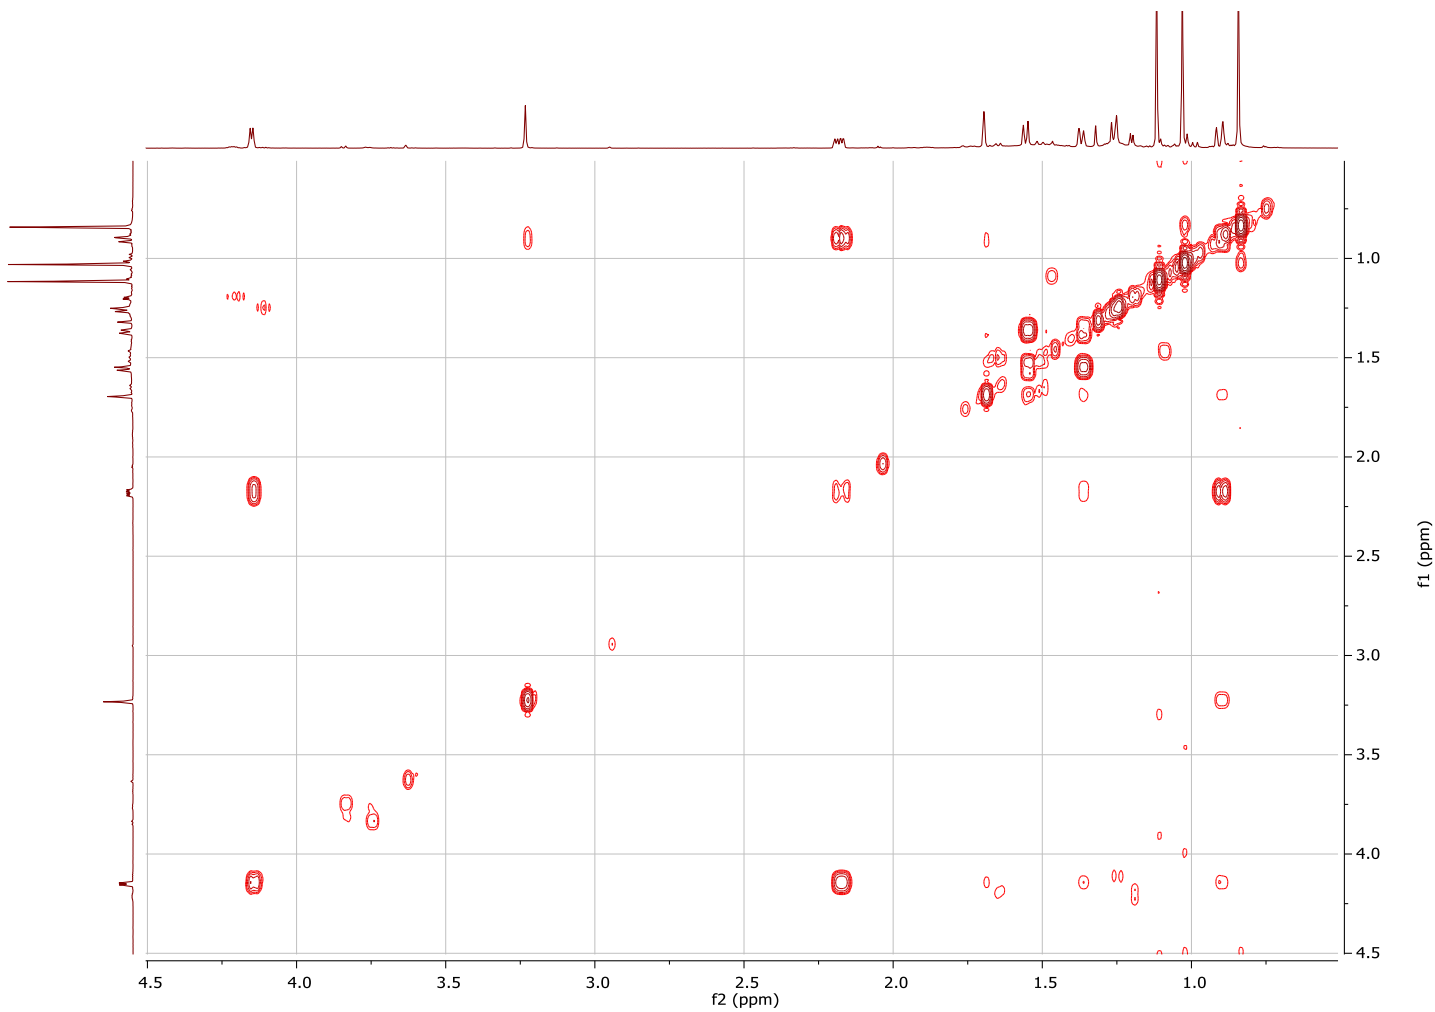

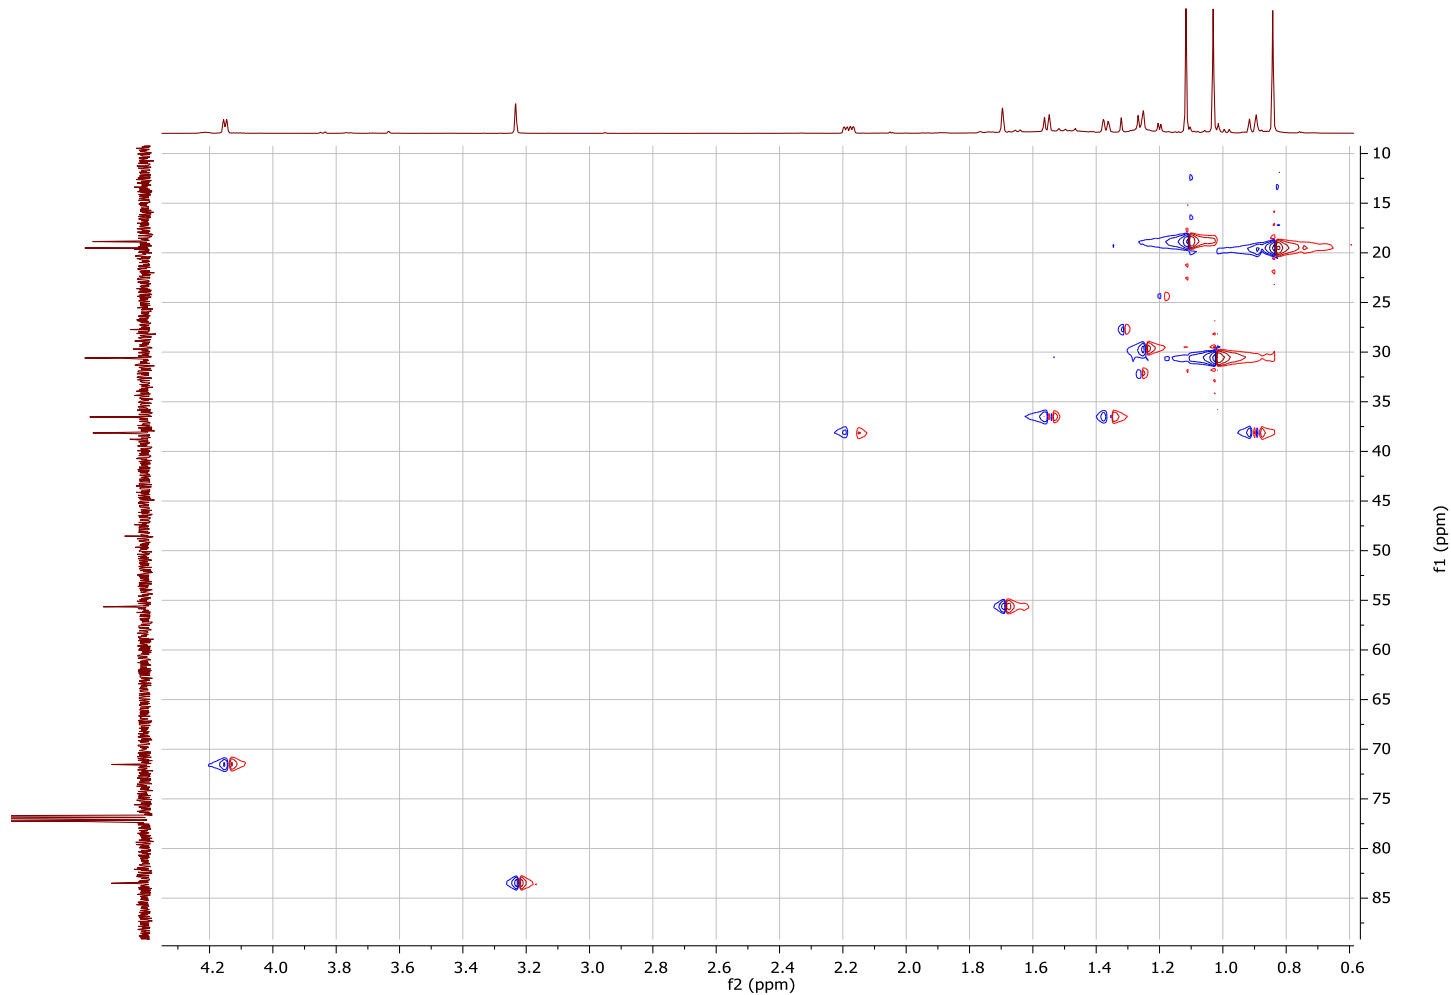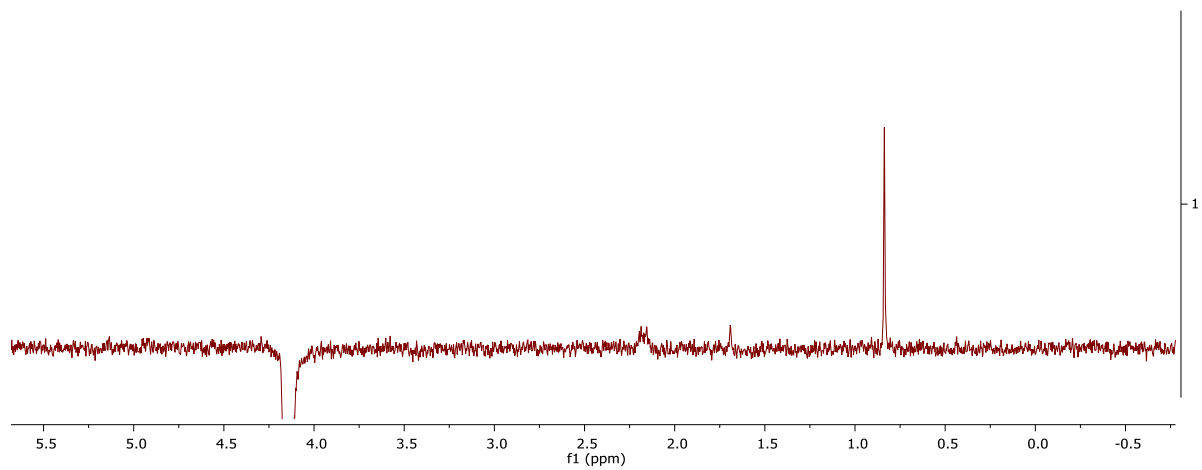

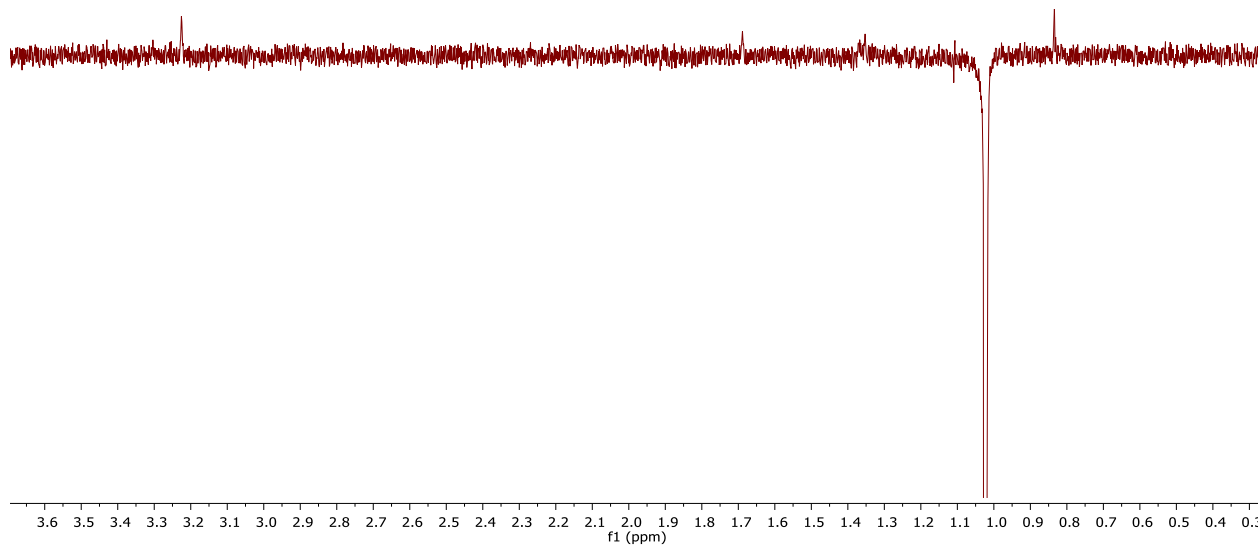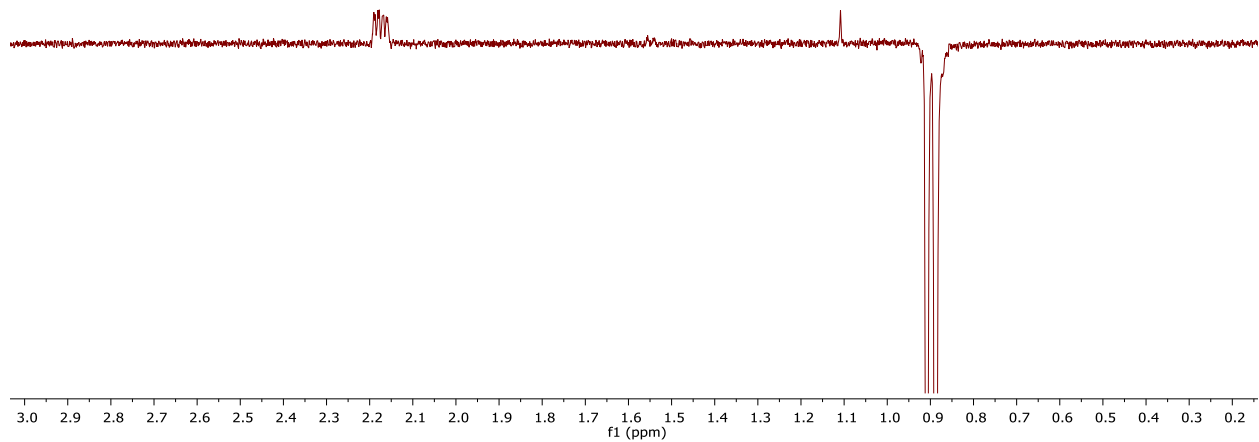

---

## References

1. S. Shaik, S. Cohen, Y. Wang, H. Chen, D. Kumar, W. Thiel, P450 Enzymes: Their Structure, Reactivity, and Selectivity—Modeled by QM/MM Calculations. *Chem. Rev.* **110**, 949 (2009).
2. P. Rydberg, E. Sigfridsson, U. Ryde, On the role of the axial ligand in heme proteins: a theoretical study. *JBIC J. Biol. Inorg. Chem.* **9**, 203 (2004).
3. S. Y. Li, H. Ouellet, D. H. Sherman, L. M. Podust, Analysis of Transient and Catalytic Desosamine-binding Pockets in Cytochrome P-450 PikC from *Streptomyces venezuelae*. *J. Biol. Chem.* **284**, 5723 (2009).
4. S. Negretti, A. R. H. Narayan, K. C. Chiou, P. M. Kells, J. L. Stachowski, D. A. Hansen, L. M. Podust, J. Montgomery, D. H. Sherman, Directing Group-Controlled Regioselectivity in an Enzymatic C-H Bond Oxygenation. *J. Am. Chem. Soc.* **136**, 4901 (2014).
5. S. Y. Li, D. H. Sherman, J. Montgomery, M. R. Chaulagain, A. R. Knauff, U.S. Patent WO 2011038313 A2: 2012.
6. S. Y. Li, L. M. Podust, D. H. Sherman, Engineering and analysis of a self-sufficient biosynthetic cytochrome P450 PikC fused to the RhFRED reductase domain. *J. Am. Chem. Soc.* **129**, 12940-12941 (2007).
7. S. Y. Li, M. R. Chaulagain, A. R. Knauff, L. M. Podust, J. Montgomery, D. H. Sherman, Selective oxidation of carbonyl C-H bonds by an engineered macrolide P450 monooxygenase. *Proc. Natl. Acad. Sci. U. S. A.* **106**, 18463-18468 (2009).
8. R. Atta ur, M. Yaqoob, A. Farooq, S. Anjum, F. Asif, M. I. Choudhary, Fungal transformation of (1R,2S,5R)-(-)-menthol by *Cephalosporium aphidicola*. *J. Nat. Prod.* **61**, 1340-1342 (1998).
9. Y. Asakawa, H. Takahashi, M. Toyota, Y. Noma, Biotransformation of monoterpenoids, (-)-menthols and (+)-menthols, terpinolene and carvotanacetone by *Aspergillus* species. *Phytochemistry* **30**, 3981-3987 (1991).



**Cartesian coordinates of geometries optimized at the B3LYP/6-31G(d)+LanL2DZ(Fe) level**

|           |             |             |             |                        |             |             |             |
|-----------|-------------|-------------|-------------|------------------------|-------------|-------------|-------------|
| <b>cI</b> |             |             |             | H                      | -0.80550033 | -0.95267287 | -1.44902700 |
| Fe        | 0.41589650  | 1.09981514  | 0.00000000  | H                      | -0.41045333 | -1.84851187 | 0.02319700  |
| N         | 2.19058150  | 0.16054114  | 0.22062100  | H                      | 0.48959767  | 0.16340913  | 1.07849600  |
| N         | -0.51485050 | -0.69090486 | 0.10021600  | H                      | -1.79196933 | 2.92045413  | -0.23286200 |
| N         | 1.33155650  | 2.87973314  | 0.23742200  | H                      | -1.40402333 | 2.00564113  | 1.21623600  |
| N         | -1.37604350 | 2.02335714  | 0.07190000  | H                      | -0.19695933 | 1.53721713  | -1.55989500 |
| C         | 3.42552250  | 0.75268714  | 0.31712100  | H                      | -2.04916933 | -0.51088287 | 1.31335700  |
| C         | -1.87079750 | -0.92002686 | 0.03413100  | O                      | 1.55943467  | -0.16672687 | -0.66009500 |
| C         | 2.42378450  | -1.18819686 | 0.15783900  | C                      | 2.41427167  | -0.97854787 | 0.00440200  |
| C         | 0.07979250  | -1.93484486 | 0.06179000  | O                      | 2.20826867  | -1.43079787 | 1.11018800  |
| C         | 2.67838850  | 3.10369214  | 0.33603800  | C                      | 3.65463067  | -1.23347287 | -0.82239700 |
| C         | -2.60957150 | 1.43461514  | -0.01282000 | H                      | 4.16462667  | -0.28864387 | -1.03804000 |
| C         | 0.74493050  | 4.11658014  | 0.20167900  | H                      | 4.32433367  | -1.89960987 | -0.27744900 |
| C         | -1.60206550 | 3.37836814  | 0.04717900  | H                      | 3.38158267  | -1.68245087 | -1.78295800 |
| C         | 4.46248450  | -0.25114686 | 0.32544400  | H                      | -2.69065433 | 0.88039213  | -1.33006300 |
| C         | -2.13481950 | -2.33731786 | -0.01233600 | H                      | -3.50023033 | 1.16122113  | 0.20870500  |
| C         | 3.84060350  | -1.45646986 | 0.22022600  | C                      | 1.00909667  | 2.65660713  | -0.18433600 |
| C         | -0.92726650 | -2.96427886 | -0.00058100 | C                      | 0.71405467  | 3.97707613  | -0.91457800 |
| C         | 2.95086550  | 4.52067714  | 0.37369500  | H                      | -0.16770333 | 4.48344313  | -0.50400900 |
| C         | -3.64331350 | 2.43929014  | -0.08028800 | H                      | 1.55937467  | 4.66853813  | -0.81759800 |
| C         | 1.74794550  | 5.15101414  | 0.28667700  | H                      | 0.53860367  | 3.81316213  | -1.98486700 |
| C         | -3.01689550 | 3.64713714  | -0.04357000 | C                      | -3.17534833 | -1.57867987 | -0.16855100 |
| H         | 5.52187950  | -0.04161186 | 0.40073000  | H                      | -2.88564133 | -2.57493287 | 0.18595400  |
| H         | -3.12278450 | -2.77744986 | -0.05989100 | H                      | -4.15480333 | -1.34028187 | 0.26305300  |
| H         | 4.28188550  | -2.44459786 | 0.19376400  | H                      | -3.29598533 | -1.63418887 | -1.25815800 |
| H         | -0.71871950 | -4.02604586 | -0.03269300 | H                      | 1.93462567  | 2.25237413  | -0.61416000 |
| H         | 3.93848450  | 4.95663914  | 0.45384700  | C                      | 1.27178867  | 2.91561513  | 1.30889100  |
| H         | -4.70335450 | 2.22979914  | -0.14707300 | H                      | 1.52752467  | 1.99932613  | 1.85281000  |
| H         | 1.54011550  | 6.21341814  | 0.28166300  | H                      | 2.11165067  | 3.61004513  | 1.42940000  |
| H         | -3.45536450 | 4.63648814  | -0.07396700 | H                      | 0.40371867  | 3.36846613  | 1.80254900  |
| C         | 3.65746950  | 2.11817114  | 0.38561000  |                        |             |             |             |
| C         | -2.84742850 | 0.06356414  | -0.01567800 | <b><sup>4</sup>ts2</b> |             |             |             |
| C         | -0.62082350 | 4.35639614  | 0.11113100  | Fe                     | 0.36656891  | -0.33724340 | 0.00000000  |
| C         | 1.44391450  | -2.17016986 | 0.07208700  | N                      | 1.37260391  | 0.72411860  | 1.40179400  |
| H         | 4.68969550  | 2.44524914  | 0.46521300  | N                      | 1.28897491  | -2.03004540 | 0.66672400  |
| H         | -3.88088750 | -0.26296686 | -0.08147600 | N                      | -0.62290709 | 1.31945360  | -0.56192100 |
| H         | -0.94553350 | 5.39222414  | 0.08911400  | N                      | -0.78474009 | -1.44421540 | -1.21530200 |
| H         | 1.77376350  | -3.20348386 | 0.02852800  | C                      | 1.29990991  | 2.07839960  | 1.59910100  |
| O         | 0.49916550  | 1.14308714  | -1.61897600 | C                      | 1.10774191  | -3.30009240 | 0.18583700  |
| S         | 0.30495350  | 0.66143514  | 2.59038600  | C                      | 2.29562691  | 0.25322960  | 2.30375600  |
| C         | -1.38147850 | 0.98705614  | 3.17989500  | C                      | 2.22592191  | -2.12817040 | 1.66647900  |
| H         | -2.07221350 | 0.29558114  | 2.68152400  | C                      | -0.41071009 | 2.59397260  | -0.10769500 |
| H         | -1.42990250 | 0.80356814  | 4.25734700  | C                      | -0.67597609 | -2.79415140 | -1.44942700 |
| H         | -1.69476150 | 2.00905814  | 2.95184600  | C                      | -1.61365709 | 1.40958560  | -1.50186000 |
|           |             |             |             | C                      | -1.75738209 | -0.98606240 | -2.06780700 |
| <b>1□</b> |             |             |             | C                      | 2.19784991  | 2.47493160  | 2.65706500  |
| C         | 0.30827067  | 0.18045113  | 0.00000000  | C                      | 1.96267391  | -4.22725140 | 0.89062500  |
| C         | -0.74383133 | -0.87441287 | -0.35375800 | C                      | 2.81293891  | 1.34198660  | 3.09585700  |
| C         | -2.13038433 | -0.52485187 | 0.21475200  | C                      | 2.65105791  | -3.50022240 | 1.81356800  |
| C         | -2.53660733 | 0.88607213  | -0.24015500 | C                      | -1.28483309 | 3.52068260  | -0.79358600 |
| C         | -1.47342133 | 1.93348913  | 0.12188500  | C                      | -1.62043609 | -3.19911440 | -2.46232400 |
| C         | -0.08680533 | 1.59065913  | -0.46500000 | C                      | -2.03311409 | 2.78504260  | -1.65754300 |

|   |             |             |             |                                |            |             |             |
|---|-------------|-------------|-------------|--------------------------------|------------|-------------|-------------|
| C | -2.29392109 | -2.07855240 | -2.84304800 | H                              | 5.34328791 | -3.38133440 | -3.32247900 |
| H | 2.32701391  | 3.49128360  | 3.00689900  | H                              | 5.43395491 | -1.78345040 | -4.07322000 |
| H | 2.00769991  | -5.29212840 | 0.70004300  | H                              | 3.38275891 | 2.63355360  | -3.67506100 |
| H | 3.55273991  | 1.23714460  | 3.87927100  | H                              | 2.47310391 | 2.04282560  | -2.28089300 |
| H | 3.37398291  | -3.84705040 | 2.54112700  | H                              | 5.49701791 | 2.48068960  | -2.40380100 |
| H | -1.31156609 | 4.58837460  | -0.61615800 |                                |            |             |             |
| H | -1.73701009 | -4.21230240 | -2.82581400 |                                |            |             |             |
| H | -2.80322709 | 3.12120360  | -2.34018600 |                                |            |             |             |
| H | -3.07652209 | -1.98131540 | -3.58482400 |                                |            |             |             |
| C | 0.48083691  | 2.95414160  | 0.89400100  |                                |            |             |             |
| C | 0.20053991  | -3.65918040 | -0.80665300 |                                |            |             |             |
| C | -2.15533709 | 0.33886260  | -2.19952500 |                                |            |             |             |
| C | 2.69427191  | -1.07057440 | 2.43279600  |                                |            |             |             |
| H | 0.53067491  | 4.00503160  | 1.16263800  |                                |            |             |             |
| H | 0.16634491  | -4.70549240 | -1.09513300 |                                |            |             |             |
| H | -2.94090109 | 0.55460560  | -2.91728400 |                                |            |             |             |
| H | 3.43383791  | -1.29567440 | 3.19473000  |                                |            |             |             |
| O | 1.52158291  | -0.03145240 | -1.26264800 |                                |            |             |             |
| S | -1.10490109 | -0.73338840 | 1.89440000  |                                |            |             |             |
| C | -2.07745509 | -2.24539740 | 1.61424300  |                                |            |             |             |
| H | -1.40638809 | -3.10555340 | 1.51446000  |                                |            |             |             |
| H | -2.71705509 | -2.40597140 | 2.48744000  |                                |            |             |             |
| H | -2.68552909 | -2.16820940 | 0.70963400  |                                |            |             |             |
| C | 4.95360691  | 0.07836360  | -1.16189500 |                                |            |             |             |
| C | 4.69643791  | 1.50286260  | -0.66590900 |                                |            |             |             |
| C | 4.54506091  | 2.47755260  | -1.84787100 |                                |            |             |             |
| C | 3.44006091  | 1.98049860  | -2.79380000 |                                |            |             |             |
| C | 3.65417491  | 0.52669160  | -3.25059100 |                                |            |             |             |
| C | 3.87328891  | -0.44775140 | -2.09283400 |                                |            |             |             |
| H | 3.78652991  | 1.51282360  | -0.05414400 |                                |            |             |             |
| H | 5.53258791  | 1.80870560  | -0.02441800 |                                |            |             |             |
| H | 5.91284891  | 0.06707860  | -1.69584100 |                                |            |             |             |
| H | 2.79516991  | 0.20502160  | -3.84711100 |                                |            |             |             |
| H | 4.53218891  | 0.48174060  | -3.91891600 |                                |            |             |             |
| H | 2.66229691  | -0.34097940 | -1.43476000 |                                |            |             |             |
| O | 5.10118691  | -0.81341740 | -0.02217000 |                                |            |             |             |
| C | 6.35861291  | -1.13935140 | 0.35283300  |                                |            |             |             |
| O | 7.36522891  | -0.75971740 | -0.20875700 |                                |            |             |             |
| C | 6.34175091  | -2.03465740 | 1.57138000  |                                |            |             |             |
| H | 6.03606991  | -1.45233140 | 2.44791300  |                                |            |             |             |
| H | 5.61648391  | -2.84315840 | 1.44363300  |                                |            |             |             |
| H | 7.34134391  | -2.43815940 | 1.73838200  |                                |            |             |             |
| C | 3.96663291  | -1.94062640 | -2.44407900 |                                |            |             |             |
| C | 2.79631291  | -2.42328440 | -3.31585200 |                                |            |             |             |
| H | 2.86552691  | -2.03114840 | -4.33762400 |                                |            |             |             |
| H | 2.80675291  | -3.51749240 | -3.38614800 |                                |            |             |             |
| H | 1.83511791  | -2.11414740 | -2.89626000 |                                |            |             |             |
| C | 4.27528191  | 3.90638860  | -1.36136200 |                                |            |             |             |
| H | 5.07887891  | 4.26426960  | -0.70621400 |                                |            |             |             |
| H | 4.19422191  | 4.60226460  | -2.20520800 |                                |            |             |             |
| H | 3.33505191  | 3.95302160  | -0.79723400 |                                |            |             |             |
| H | 3.92242091  | -2.48748940 | -1.49400200 |                                |            |             |             |
| C | 5.31290391  | -2.30464440 | -3.11580700 |                                |            |             |             |
| H | 6.17558191  | -2.06226840 | -2.48709800 |                                |            |             |             |
|   |             |             |             | <sup>4</sup> ts <sub>3ax</sub> |            |             |             |
|   |             |             |             | Fe                             | 1.485629   | 0.018352    | 0.268703    |
|   |             |             |             | N                              | 1.673959   | 2.024004    | 0.155143    |
|   |             |             |             | N                              | 1.654165   | -0.085714   | -1.767399   |
|   |             |             |             | N                              | 1.418563   | 0.122712    | 2.269534    |
|   |             |             |             | N                              | 1.541279   | -1.992527   | 0.364171    |
|   |             |             |             | C                              | 1.613985   | 2.904250    | 1.204890    |
|   |             |             |             | C                              | 1.657337   | -1.223079   | -2.533420   |
|   |             |             |             | C                              | 1.781790   | 2.789658    | -0.981247   |
|   |             |             |             | C                              | 1.775573   | 0.965049    | -2.643700   |
|   |             |             |             | C                              | 1.385609   | 1.258771    | 3.031718    |
|   |             |             |             | C                              | 1.536616   | -2.870589   | -0.691463   |
|   |             |             |             | C                              | 1.349782   | -0.925598   | 3.147590    |
|   |             |             |             | C                              | 1.457329   | -2.758439   | 1.498627    |
|   |             |             |             | C                              | 1.700706   | 4.260944    | 0.721762    |
|   |             |             |             | C                              | 1.765914   | -0.881868   | -3.933340   |
|   |             |             |             | C                              | 1.806579   | 4.189703    | -0.634084   |
|   |             |             |             | C                              | 1.840920   | 0.475980    | -4.000721   |
|   |             |             |             | C                              | 1.277723   | 0.919586    | 4.434330    |
|   |             |             |             | C                              | 1.472581   | -4.228112   | -0.207334   |
|   |             |             |             | C                              | 1.257793   | -0.437065   | 4.506424    |
|   |             |             |             | C                              | 1.426627   | -4.158666   | 1.152162    |
|   |             |             |             | H                              | 1.679993   | 5.141338    | 1.351447    |
|   |             |             |             | H                              | 1.788311   | -1.599745   | -4.743513   |
|   |             |             |             | H                              | 1.890207   | 4.999619    | -1.347542   |
|   |             |             |             | H                              | 1.937475   | 1.103187    | -4.877911   |
|   |             |             |             | H                              | 1.229894   | 1.640225    | 5.240759    |
|   |             |             |             | H                              | 1.459984   | -5.107759   | -0.838361   |
|   |             |             |             | H                              | 1.188105   | -1.066626   | 5.384343    |
|   |             |             |             | H                              | 1.366146   | -4.969127   | 1.867386    |
|   |             |             |             | C                              | 1.476928   | 2.555094    | 2.543552    |
|   |             |             |             | C                              | 1.593813   | -2.520853   | -2.036573   |
|   |             |             |             | C                              | 1.378235   | -2.268281   | 2.797316    |
|   |             |             |             | C                              | 1.832203   | 2.304887    | -2.282569   |
|   |             |             |             | H                              | 1.442726   | 3.364226    | 3.266712    |
|   |             |             |             | H                              | 1.594379   | -3.331183   | -2.759545   |
|   |             |             |             | H                              | 1.315191   | -2.995816   | 3.600833    |
|   |             |             |             | H                              | 1.922887   | 3.034063    | -3.081927   |
|   |             |             |             | O                              | -0.256662  | 0.052084    | 0.239796    |
|   |             |             |             | S                              | 3.918454   | 0.140918    | 0.159374    |
|   |             |             |             | C                              | 4.612911   | -1.463146   | -0.342960   |
|   |             |             |             | H                              | 4.241861   | -1.728394   | -1.339382   |
|   |             |             |             | H                              | 5.701446   | -1.366125   | -0.393927   |
|   |             |             |             | H                              | 4.335561   | -2.255986   | 0.355905    |
|   |             |             |             | C                              | -3.730225  | 0.250381    | -0.153630   |
|   |             |             |             | C                              | -3.865081  | 1.762842    | -0.346786   |
|   |             |             |             | C                              | -2.516448  | 2.417782    | -0.690326   |
|   |             |             |             | C                              | -1.910049  | 1.732348    | -1.927484   |

|                                |             |             |             |   |              |             |             |
|--------------------------------|-------------|-------------|-------------|---|--------------|-------------|-------------|
| C                              | -1.815852   | 0.226098    | -1.767760   | C | 0.80153981   | -3.93606394 | -1.17984700 |
| C                              | -3.128038   | -0.452629   | -1.382470   | H | -1.83751919  | 3.82502806  | 3.27717000  |
| H                              | -4.585034   | 1.950236    | -1.157843   | H | 2.17261681   | 1.39860506  | -4.50629400 |
| H                              | -4.280772   | 2.200563    | 0.568025    | H | -1.00419619  | 5.13549206  | 1.05533300  |
| H                              | -3.130448   | 0.047388    | 0.736425    | H | 1.32016181   | 3.73535706  | -3.43595000 |
| H                              | -0.894376   | 0.069816    | -0.748221   | H | -2.13438619  | -1.23838894 | 4.69979600  |
| H                              | -3.818767   | -0.238528   | -2.221904   | H | 1.79621281   | -3.67204194 | -3.13002200 |
| H                              | -1.829024   | 2.239814    | 0.147777    | H | -1.49198219  | -3.59405794 | 3.51959300  |
| O                              | -5.053708   | -0.325711   | 0.050458    | H | 0.76422281   | -5.00406894 | -1.00630000 |
| C                              | -5.560689   | -0.305645   | 1.302862    | C | -1.51046319  | 0.99441006  | 3.02278500  |
| O                              | -4.988055   | 0.152554    | 2.268303    | C | 1.51153281   | -0.83560694 | -2.84758500 |
| C                              | -6.937186   | -0.935248   | 1.325380    | C | -0.31924419  | -3.21188594 | 0.94449500  |
| H                              | -7.603641   | -0.407270   | 0.634922    | C | 0.04822081   | 3.34827806  | -0.90775200 |
| H                              | -6.881619   | -1.975657   | 0.987780    | H | -1.93642519  | 1.28677606  | 3.97798800  |
| H                              | -7.340610   | -0.893286   | 2.337591    | H | 2.00222681   | -1.12301094 | -3.77282600 |
| H                              | -2.545837   | 1.954903    | -2.805147   | H | -0.40111719  | -4.25592494 | 1.23205400  |
| C                              | -3.102031   | -2.003363   | -1.257212   | H | 0.07550781   | 4.38902706  | -1.21626600 |
| C                              | -2.500590   | -2.666632   | -2.507027   | O | -1.66913819  | -0.13589294 | -0.89165500 |
| H                              | -1.413009   | -2.539043   | -2.554250   | S | 2.11083681   | 0.56195006  | 1.00128300  |
| H                              | -2.701954   | -3.744527   | -2.498400   | C | 3.35711681   | -0.50944594 | 0.22808000  |
| H                              | -2.929333   | -2.255964   | -3.430512   | H | 3.38465681   | -0.30815094 | -0.84997200 |
| C                              | -2.655911   | 3.930933    | -0.888688   | H | 4.34061881   | -0.28193694 | 0.64904500  |
| H                              | -3.102879   | 4.406964    | -0.007642   | H | 3.11553581   | -1.56585394 | 0.37212800  |
| H                              | -1.677606   | 4.395589    | -1.061400   | C | -6.40394719  | 0.16810306  | -0.51677700 |
| H                              | -3.294884   | 4.160466    | -1.751999   | C | -6.50917419  | 1.65670706  | -0.85487200 |
| H                              | -4.156873   | -2.303989   | -1.212702   | C | -5.47119119  | 2.49761206  | -0.09825800 |
| C                              | -2.424845   | -2.522881   | 0.022008    | C | -4.05830119  | 1.92797106  | -0.36372700 |
| H                              | -2.988567   | -2.244350   | 0.919288    | C | -3.98569819  | 0.45187306  | -0.02632200 |
| H                              | -2.367442   | -3.618369   | -0.000669   | C | -4.99092319  | -0.41827594 | -0.77700400 |
| H                              | -1.412210   | -2.126612   | 0.136674    | H | -6.36157919  | 1.77899506  | -1.93776800 |
| H                              | -0.922900   | 2.151629    | -2.148675   | H | -7.52484919  | 1.99951306  | -0.62353600 |
| H                              | -1.290393   | -0.267520   | -2.588204   | H | -6.70093619  | 0.00416406  | 0.52319100  |
|                                |             |             |             | H | -2.70356319  | 0.10681906  | -0.39754500 |
|                                |             |             |             | H | -3.95329619  | 0.25820106  | 1.05027800  |
|                                |             |             |             | H | -4.80685219  | -0.29136694 | -1.85492800 |
|                                |             |             |             | H | -5.67469619  | 2.40205906  | 0.97969900  |
|                                |             |             |             | O | -7.34112919  | -0.56159894 | -1.35988000 |
|                                |             |             |             | C | -8.60336119  | -0.72012694 | -0.90116900 |
|                                |             |             |             | O | -9.00692919  | -0.28966894 | 0.15834800  |
|                                |             |             |             | C | -9.43215919  | -1.50873694 | -1.89132700 |
|                                |             |             |             | H | -8.98807719  | -2.49689594 | -2.05184100 |
|                                |             |             |             | H | -10.44852419 | -1.61647294 | -1.51062400 |
|                                |             |             |             | H | -9.44864819  | -0.99860894 | -2.86011500 |
|                                |             |             |             | H | -3.81566719  | 2.07433206  | -1.42676400 |
|                                |             |             |             | C | -4.93802219  | -1.94384194 | -0.47446900 |
|                                |             |             |             | C | -3.80148919  | -2.63707594 | -1.24294000 |
|                                |             |             |             | H | -2.82302019  | -2.22916994 | -0.97420100 |
|                                |             |             |             | H | -3.80055319  | -3.71493194 | -1.03581900 |
|                                |             |             |             | H | -3.92541419  | -2.50621894 | -2.32505400 |
|                                |             |             |             | C | -5.56129419  | 3.98232706  | -0.47033600 |
|                                |             |             |             | H | -6.55757119  | 4.38708006  | -0.25478300 |
|                                |             |             |             | H | -4.82732719  | 4.57341006  | 0.09018300  |
|                                |             |             |             | H | -5.36332919  | 4.13033106  | -1.53971200 |
|                                |             |             |             | H | -5.87970219  | -2.35447294 | -0.85999100 |
| <sup>4</sup> ts <sub>3eq</sub> |             |             |             |   |              |             |             |
| Fe                             | -0.18018019 | 0.06006006  | 0.00000000  |   |              |             |             |
| N                              | -0.64884019 | 1.81713406  | 0.88028500  |   |              |             |             |
| N                              | 0.68044981  | 1.06094806  | -1.53236600 |   |              |             |             |
| N                              | -0.81083719 | -0.91096494 | 1.64909500  |   |              |             |             |
| N                              | 0.49097981  | -1.67947194 | -0.78785700 |   |              |             |             |
| C                              | -1.19799719 | 2.00706106  | 2.12655900  |   |              |             |             |
| C                              | 1.30193181  | 0.51974406  | -2.63343600 |   |              |             |             |
| C                              | -0.51423119 | 3.06703506  | 0.33419400  |   |              |             |             |
| C                              | 0.61674881  | 2.41764306  | -1.76216600 |   |              |             |             |
| C                              | -1.33874919 | -0.36774094 | 2.78964200  |   |              |             |             |
| C                              | 1.11486781  | -1.85998594 | -1.98967600 |   |              |             |             |
| C                              | -0.81454019 | -2.26735394 | 1.83994000  |   |              |             |             |
| C                              | 0.28330281  | -2.93484894 | -0.27524500 |   |              |             |             |
| C                              | -1.41930419 | 3.41269006  | 2.36766800  |   |              |             |             |
| C                              | 1.66610181  | 1.56296606  | -3.56360400 |   |              |             |             |
| C                              | -1.00218919 | 4.07063206  | 1.25078100  |   |              |             |             |
| C                              | 1.23595681  | 2.73654806  | -3.02677100 |   |              |             |             |
| C                              | -1.69612219 | -1.40731694 | 3.72444100  |   |              |             |             |
| C                              | 1.31955181  | -3.26748594 | -2.24611500 |   |              |             |             |
| C                              | -1.37390619 | -2.59049394 | 3.13112300  |   |              |             |             |

|   |             |             |            |
|---|-------------|-------------|------------|
| C | -4.87564019 | -2.28026994 | 1.02459400 |
| H | -5.66684219 | -1.78057494 | 1.59722700 |
| H | -5.00124019 | -3.35984894 | 1.17134600 |
| H | -3.91223219 | -2.00265594 | 1.46551100 |
| H | -3.31775519 | 2.49099006  | 0.21261400 |

<sup>4</sup>ts<sub>ax</sub>

|    |             |             |             |
|----|-------------|-------------|-------------|
| Fe | 0.30411448  | 0.95706618  | 0.00000000  |
| N  | -0.17577852 | 2.90781418  | 0.15995400  |
| N  | 0.48805948  | 1.19508518  | -2.02792300 |
| N  | 0.19540548  | 0.75133018  | 1.98912700  |
| N  | 1.02923348  | -0.91181882 | -0.16992800 |
| C  | -0.45818752 | 3.58455318  | 1.31879300  |
| C  | 0.88458248  | 0.24646018  | -2.93440900 |
| C  | -0.35405452 | 3.80892218  | -0.86292600 |
| C  | 0.19645448  | 2.32194118  | -2.75547000 |
| C  | -0.16458152 | 1.70991418  | 2.89797200  |
| C  | 1.34542948  | -1.57769782 | -1.32930400 |
| C  | 0.44097048  | -0.38527582 | 2.71304700  |
| C  | 1.16147348  | -1.82592982 | 0.84383000  |
| C  | -0.80002052 | 4.95465418  | 1.02351800  |
| C  | 0.82682648  | 0.78279818  | -4.27514700 |
| C  | -0.74056052 | 5.09212018  | -0.32982300 |
| C  | 0.39519748  | 2.06954118  | -4.16374700 |
| C  | -0.16609852 | 1.15769218  | 4.23556700  |
| C  | 1.72044648  | -2.93866682 | -1.03239100 |
| C  | 0.20704748  | -0.14381282 | 4.12043500  |
| C  | 1.60345948  | -3.09349582 | 0.31605800  |
| H  | -1.05944252 | 5.69862118  | 1.76592300  |
| H  | 1.08844848  | 0.23475518  | -5.17157200 |
| H  | -0.93773652 | 5.97295718  | -0.92761300 |
| H  | 0.23200348  | 2.79592218  | -4.94977800 |
| H  | -0.41694952 | 1.71233818  | 5.13088200  |
| H  | 2.02010848  | -3.67079582 | -1.77158900 |
| H  | 0.32816448  | -0.88382682 | 4.90127300  |
| H  | 1.78817648  | -3.97826582 | 0.91202400  |
| C  | -0.45575452 | 3.03294118  | 2.59504200  |
| C  | 1.29342448  | -1.04341982 | -2.61207600 |
| C  | 0.89193848  | -1.58726882 | 2.18713700  |
| C  | -0.20278152 | 3.53839418  | -2.21750600 |
| H  | -0.71037752 | 3.69037918  | 3.42078200  |
| H  | 1.58071948  | -1.69525782 | -3.43176900 |
| H  | 1.04657448  | -2.40965382 | 2.87906600  |
| H  | -0.39211552 | 4.35275118  | -2.91038400 |
| O  | -1.34487352 | 0.41832718  | -0.13213000 |
| S  | 2.54630548  | 1.89794818  | 0.02206900  |
| C  | 3.73982048  | 0.70240518  | -0.65196200 |
| H  | 3.56104748  | 0.57466318  | -1.72552600 |
| H  | 4.74424248  | 1.11570518  | -0.51703900 |
| H  | 3.66191848  | -0.27050282 | -0.16257300 |
| C  | -5.28561752 | -0.00206582 | -0.69320500 |
| C  | -4.30261452 | -1.16767682 | -0.82596400 |
| C  | -3.46533152 | -1.06604282 | -2.11463300 |
| C  | -2.80759152 | 0.30109218  | -2.21204500 |

|   |             |             |             |
|---|-------------|-------------|-------------|
| C | -3.74026252 | 1.47820918  | -2.00001300 |
| C | -4.58122052 | 1.36357018  | -0.70779600 |
| H | -3.63151652 | -1.16308182 | 0.04187400  |
| H | -4.86098552 | -2.11098182 | -0.81613300 |
| H | -6.03863752 | -0.06333182 | -1.48452400 |
| H | -3.16541152 | 2.41050718  | -1.99158300 |
| H | -4.41334752 | 1.54120618  | -2.87328400 |
| H | -3.87491252 | 1.36060418  | 0.13358500  |
| H | -4.16411452 | -1.13814182 | -2.97043700 |
| O | -5.98191252 | -0.12528182 | 0.58136900  |
| C | -7.16187652 | -0.78219482 | 0.59655600  |
| O | -7.68960652 | -1.27302882 | -0.37966600 |
| C | -7.74960652 | -0.78328382 | 1.99115100  |
| H | -8.19199852 | 0.19892418  | 2.19724600  |
| H | -8.52867052 | -1.54374282 | 2.05741300  |
| H | -6.97425452 | -0.95518582 | 2.74261600  |
| H | -1.91997852 | 0.35180118  | -1.16328600 |
| C | -5.55870552 | 2.55090118  | -0.47887100 |
| C | -4.80333952 | 3.86428818  | -0.21947600 |
| H | -4.27118652 | 4.21566318  | -1.11109800 |
| H | -5.50003952 | 4.65764818  | 0.07793400  |
| H | -4.06181552 | 3.74860318  | 0.57990500  |
| C | -2.46766952 | -2.22524382 | -2.22829800 |
| H | -2.98680752 | -3.19084182 | -2.20580400 |
| H | -1.89992452 | -2.16784582 | -3.16442900 |
| H | -1.75383752 | -2.20134382 | -1.39795000 |
| H | -6.10489752 | 2.30893918  | 0.44201600  |
| C | -6.60275752 | 2.73734318  | -1.59378700 |
| H | -7.21713152 | 1.84206518  | -1.74141000 |
| H | -7.28083452 | 3.56194318  | -1.34255200 |
| H | -6.13360452 | 2.98642518  | -2.55366700 |
| H | -2.14388152 | 0.41499818  | -3.07422400 |

<sup>4</sup>ts<sub>eq</sub>

|    |             |             |             |
|----|-------------|-------------|-------------|
| Fe | 0.30499077  | 0.13863216  | 0.00000000  |
| N  | 1.01326277  | -1.73989084 | -0.08830200 |
| N  | -0.43658723 | -0.24339584 | 1.86786400  |
| N  | 1.11165577  | 0.54029216  | -1.79093300 |
| N  | -0.21913823 | 2.07608116  | 0.21735600  |
| C  | 1.71474877  | -2.30142584 | -1.12463100 |
| C  | -1.05821723 | 0.64309216  | 2.71158500  |
| C  | 0.80087977  | -2.74858184 | 0.82113700  |
| C  | -0.45201223 | -1.45586284 | 2.51076400  |
| C  | 1.79361377  | -0.32520484 | -2.60131800 |
| C  | -0.88856423 | 2.64596416  | 1.27076400  |
| C  | 1.06103277  | 1.73140816  | -2.46458300 |
| C  | -0.09470823 | 3.05835716  | -0.73144400 |
| C  | 1.97294077  | -3.69485684 | -0.85331500 |
| C  | -1.48270023 | -0.02970184 | 3.91765100  |
| C  | 1.40078377  | -3.97345984 | 0.34994400  |
| C  | -1.11177723 | -1.33345084 | 3.78965500  |
| C  | 2.17625277  | 0.33331216  | -3.83171700 |
| C  | -1.17154223 | 4.03249016  | 0.98979000  |
| C  | 1.71738777  | 1.60974116  | -3.74852400 |

|   |              |             |             |                        |             |             |             |
|---|--------------|-------------|-------------|------------------------|-------------|-------------|-------------|
| C | -0.68075523  | 4.28757416  | -0.25558400 | H                      | -7.41675723 | 1.84277716  | 0.34734200  |
| H | 2.51378577   | -4.36088084 | -1.51355500 | C                      | -6.26102623 | 2.59997816  | -1.28771600 |
| H | -1.99548223  | 0.44765916  | 4.74321800  | H                      | -6.63107123 | 1.89043716  | -2.03619300 |
| H | 1.37724777   | -4.91517084 | 0.88346300  | H                      | -6.86332723 | 3.51193716  | -1.37756900 |
| H | -1.25392123  | -2.14640284 | 4.49044800  | H                      | -5.23045423 | 2.86256716  | -1.55396700 |
| H | 2.72418577   | -0.13691984 | -4.63838200 |                        |             |             |             |
| H | -1.68478323  | 4.70676616  | 1.66380400  | <b><sup>4</sup>ts5</b> |             |             |             |
| H | 1.81057977   | 2.41011716  | -4.47160300 | Fe                     | 0.68914955  | -0.07331378 | 0.00000000  |
| H | -0.70889823  | 5.21433416  | -0.81461200 | N                      | 1.53327455  | -1.80476078 | 0.60102800  |
| C | 2.09136377   | -1.64580384 | -2.29057800 | N                      | 2.01608355  | 0.95859022  | 1.12550800  |
| C | -1.26332123  | 1.99123516  | 2.44100300  | N                      | -0.45398545 | -1.10425278 | -1.29175600 |
| C | 0.50009777   | 2.90437816  | -1.97929500 | N                      | 0.01841355  | 1.67071322  | -0.76838000 |
| C | 0.11022477   | -2.62719584 | 2.02005400  | C                      | 1.29440355  | -3.06652378 | 0.11083000  |
| H | 2.64523077   | -2.21986984 | -3.02720200 | C                      | 2.14772255  | 2.32460022  | 1.21643800  |
| H | -1.77981823  | 2.57834716  | 3.19469900  | C                      | 2.45256755  | -1.95795678 | 1.60620900  |
| H | 0.53176877   | 3.77679316  | -2.62515500 | C                      | 2.86358855  | 0.43150922  | 2.07352500  |
| H | 0.02207377   | -3.51818484 | 2.63431700  | C                      | -0.45066245 | -2.45333078 | -1.52469800 |
| O | -1.19147523  | -0.26731484 | -0.78620700 | C                      | 0.38859055  | 2.93568622  | -0.40944500 |
| S | 2.38201477   | 0.48874716  | 1.23969600  | C                      | -1.43638545 | -0.58369078 | -2.09111600 |
| C | 2.32237477   | 2.05689216  | 2.15790900  | C                      | -1.04359845 | 1.81289422  | -1.62604000 |
| H | 1.52144277   | 2.01160016  | 2.90476700  | C                      | 2.08166555  | -4.03923578 | 0.82893700  |
| H | 3.27479477   | 2.18734416  | 2.68035100  | C                      | 3.12655355  | 2.66471822  | 2.22292000  |
| H | 2.13464277   | 2.90439116  | 1.49445900  | C                      | 2.78783655  | -3.35287178 | 1.76936700  |
| C | -6.25123623  | -0.46877884 | -0.45241800 | C                      | 3.56074355  | 1.49306222  | 2.76099500  |
| C | -5.56357523  | -1.81203684 | -0.18956100 | C                      | -1.46669345 | -2.79851478 | -2.49071200 |
| C | -4.04326023  | -1.75744784 | -0.48275200 | C                      | -0.44166145 | 3.91199122  | -1.07639200 |
| C | -3.44744723  | -0.60628484 | 0.30560100  | C                      | -2.09153045 | -1.63619578 | -2.83046500 |
| C | -4.10616623  | 0.73056116  | 0.04115500  | C                      | -1.33779545 | 3.21322122  | -1.82654100 |
| C | -5.62809523  | 0.68523816  | 0.34876500  | H                      | 2.07779555  | -5.10386178 | 0.63214300  |
| H | -5.72430823  | -2.09003384 | 0.86179100  | H                      | 3.41879855  | 3.67455122  | 2.48201700  |
| H | -6.03590023  | -2.58345184 | -0.80975500 | H                      | 3.49033655  | -3.73732078 | 2.49798000  |
| H | -6.22899623  | -0.25528184 | -1.52492300 | H                      | 4.28791255  | 1.34237822  | 3.54888500  |
| H | -3.62941923  | 1.51328316  | 0.63876800  | H                      | -1.66717845 | -3.80192678 | -2.84478300 |
| H | -3.95412223  | 0.99803716  | -1.01291800 | H                      | -0.34500745 | 4.98471122  | -0.96589300 |
| H | -5.74292823  | 0.42521016  | 1.41268300  | H                      | -2.91682445 | -1.48167878 | -3.51244900 |
| H | -3.92055823  | -1.53174284 | -1.55316900 | H                      | -2.12854645 | 3.59207822  | -2.46140400 |
| O | -7.64930423  | -0.57095784 | -0.05406800 | C                      | 0.38985455  | -3.37017678 | -0.89803700 |
| C | -8.52816423  | -1.03412884 | -0.97211600 | C                      | 1.40504955  | 3.24745322  | 0.49299600  |
| O | -8.23076923  | -1.35745384 | -2.10218400 | C                      | -1.73138345 | 0.77017222  | -2.23201900 |
| C | -9.92401023  | -1.08953784 | -0.39090800 | C                      | 3.04446555  | -0.92033278 | 2.32141700  |
| H | -10.22993623 | -0.09748784 | -0.04261500 | H                      | 0.29845855  | -4.41210178 | -1.19057200 |
| H | -10.61995223 | -1.44799284 | -1.15026300 | H                      | 1.59857055  | 4.29954922  | 0.68062200  |
| H | -9.94308623  | -1.75884984 | 0.47579000  | H                      | -2.56680745 | 1.02658922  | -2.87378700 |
| H | -3.30056523  | -0.83181084 | 1.36784700  | H                      | 3.75226355  | -1.19344878 | 3.09837900  |
| H | -2.15982723  | -0.44835784 | -0.15718800 | O                      | -0.52436245 | 0.04061522  | 1.24782300  |
| C | -6.35654823  | 2.04236316  | 0.14249600  | S                      | 2.71559455  | -0.06568978 | -1.56165600 |
| C | -5.89079623  | 3.09436816  | 1.16274200  | C                      | 2.89919555  | 1.58303222  | -2.30193500 |
| H | -4.85164323  | 3.39908716  | 0.98936000  | H                      | 3.09771555  | 2.31396322  | -1.50807300 |
| H | -6.51039623  | 3.99662416  | 1.09582600  | H                      | 3.75115355  | 1.57758522  | -2.98809500 |
| H | -5.96333523  | 2.71506316  | 2.18968700  | H                      | 1.98864655  | 1.88575922  | -2.82579800 |
| C | -3.36542223  | -3.10096784 | -0.19493000 | C                      | -4.09005145 | -0.66206978 | 0.90834900  |
| H | -3.81800723  | -3.90554484 | -0.78670600 | C                      | -3.28523245 | -1.91800578 | 1.26431600  |
| H | -2.29916023  | -3.05396384 | -0.43804600 | C                      | -2.12076345 | -1.66395678 | 2.21098600  |
| H | -3.46035523  | -3.36966984 | 0.86515400  | C                      | -2.49132745 | -0.78200278 | 3.39409300  |

|                                     |             |             |             |   |             |             |             |
|-------------------------------------|-------------|-------------|-------------|---|-------------|-------------|-------------|
| C                                   | -3.26569645 | 0.47585622  | 2.97562500  | C | -1.23106049 | -1.45905258 | 3.46226300  |
| C                                   | -4.52460545 | 0.13225922  | 2.15188700  | H | 4.13414651  | -2.15125758 | -4.10143300 |
| H                                   | -3.97701745 | -2.63036578 | 1.74851300  | H | -0.65722349 | 4.14783442  | 0.36377600  |
| H                                   | -2.93918645 | -2.40164778 | 0.34267700  | H | 3.65218251  | 0.49446642  | -4.44171200 |
| H                                   | -3.52361645 | -0.03193878 | 0.22151500  | H | 0.94543551  | 4.15534342  | -1.82252400 |
| H                                   | -3.54891945 | 1.04145722  | 3.87083000  | H | 2.91749951  | -5.71068058 | -0.42616000 |
| H                                   | -2.59543545 | 1.11298622  | 2.38820500  | H | -2.16187549 | 0.50416042  | 3.84245600  |
| H                                   | -5.14251045 | -0.55257878 | 2.75582400  | H | 1.40407951  | -5.69362958 | 1.82086800  |
| H                                   | -1.22559645 | -0.87062178 | 1.55374200  | H | -1.57830149 | -2.11146858 | 4.25343400  |
| O                                   | -5.28785445 | -1.13271778 | 0.21420900  | C | 2.94106551  | -3.15302758 | -1.71086500 |
| C                                   | -5.51943845 | -0.75503978 | -1.05696300 | C | -0.80227649 | 1.55456042  | 1.56227000  |
| O                                   | -4.81396545 | -0.00988978 | -1.70768900 | C | 0.21679951  | -3.12754658 | 2.28283600  |
| C                                   | -6.79296845 | -1.39304778 | -1.57068500 | C | 2.02868851  | 1.56148142  | -2.35107700 |
| H                                   | -7.63695445 | -1.12194078 | -0.92800000 | H | 3.50759651  | -3.90322358 | -2.25379500 |
| H                                   | -6.98214745 | -1.06050178 | -2.59208500 | H | -1.41162549 | 2.29284342  | 2.07478600  |
| H                                   | -6.70274045 | -2.48418678 | -1.54496000 | H | -0.06514949 | -3.86433058 | 3.02905500  |
| C                                   | -5.42197145 | 1.35709422  | 1.82008400  | H | 2.32313551  | 2.30334342  | -3.08723200 |
| C                                   | -6.06792045 | 1.94079322  | 3.08849200  | O | 2.52390451  | -0.24291758 | 0.97577800  |
| H                                   | -5.32697645 | 2.41696422  | 3.74151900  | S | -0.57078449 | -1.57602358 | -1.49504600 |
| H                                   | -6.80783545 | 2.70608922  | 2.82524600  | C | -1.90904449 | -2.35358058 | -0.54079900 |
| H                                   | -6.58094645 | 1.16621422  | 3.67211300  | H | -2.34110849 | -1.65888958 | 0.18326900  |
| C                                   | -1.34158945 | -2.91026678 | 2.58035600  | H | -2.67593249 | -2.69501258 | -1.24270600 |
| H                                   | -1.04063445 | -3.47906778 | 1.69526500  | H | -1.51956149 | -3.22542158 | -0.00330400 |
| H                                   | -0.43848645 | -2.66088878 | 3.14798400  | C | 5.69073551  | -1.07028858 | 1.46043700  |
| H                                   | -1.95748545 | -3.57403178 | 3.20978400  | C | 4.40630251  | -1.48798258 | 2.14511900  |
| H                                   | -6.24239445 | 0.97437422  | 1.19749600  | C | 4.25483551  | -0.90048658 | 3.54094400  |
| C                                   | -4.71172745 | 2.46161222  | 1.01840300  | C | 4.43286751  | 0.62995942  | 3.49281500  |
| H                                   | -4.31714145 | 2.09010722  | 0.06752900  | C | 5.73287851  | 1.03808542  | 2.78408300  |
| H                                   | -5.41582745 | 3.27088922  | 0.78918700  | C | 5.82794951  | 0.46279042  | 1.35407300  |
| H                                   | -3.88129845 | 2.90029422  | 1.58353400  | H | 3.34801551  | -0.95402258 | 1.40901900  |
| H                                   | -1.58378245 | -0.50001878 | 3.94172900  | H | 4.20240851  | -2.56077858 | 2.06948800  |
| H                                   | -3.10678045 | -1.37731978 | 4.09357800  | H | 6.53536451  | -1.47848958 | 2.03081700  |
|                                     |             |             |             | H | 5.80025851  | 2.13159442  | 2.74740200  |
|                                     |             |             |             | H | 6.59117051  | 0.69279342  | 3.37823800  |
|                                     |             |             |             | H | 4.95124651  | 0.81634542  | 0.79420900  |
|                                     |             |             |             | H | 5.08808851  | -1.30950558 | 4.14429600  |
|                                     |             |             |             | O | 5.75533951  | -1.66752558 | 0.13692200  |
|                                     |             |             |             | C | 6.71710451  | -2.59089258 | -0.08798900 |
|                                     |             |             |             | O | 7.51784451  | -2.97297858 | 0.74077000  |
|                                     |             |             |             | C | 6.65569151  | -3.10929858 | -1.50753100 |
|                                     |             |             |             | H | 6.01587951  | -3.99899558 | -1.53308000 |
|                                     |             |             |             | H | 6.23431951  | -2.36650158 | -2.18766100 |
|                                     |             |             |             | H | 7.65884751  | -3.40297158 | -1.82282600 |
|                                     |             |             |             | C | 7.08529351  | 0.91902442  | 0.56500300  |
|                                     |             |             |             | C | 7.03224951  | 2.42359042  | 0.24996000  |
|                                     |             |             |             | H | 7.13297951  | 3.03590242  | 1.15411300  |
|                                     |             |             |             | H | 7.85020651  | 2.70441242  | -0.42441200 |
|                                     |             |             |             | H | 6.08761151  | 2.69646942  | -0.23592400 |
|                                     |             |             |             | C | 2.94415751  | -1.30740458 | 4.22269100  |
|                                     |             |             |             | H | 2.84095651  | -2.39810858 | 4.26938900  |
|                                     |             |             |             | H | 2.90605851  | -0.92114258 | 5.24853200  |
|                                     |             |             |             | H | 2.08579351  | -0.90930058 | 3.67340300  |
|                                     |             |             |             | H | 7.04262351  | 0.39463842  | -0.39903800 |
|                                     |             |             |             | C | 8.42444551  | 0.55015742  | 1.22695200  |
| <b><sup>4</sup>ts6<sub>ax</sub></b> |             |             |             |   |             |             |             |
| Fe                                  | 1.17302051  | -0.74780058 | 0.00000000  |   |             |             |             |
| N                                   | 2.22840451  | -0.80136958 | -1.71413100 |   |             |             |             |
| N                                   | 0.73210551  | 1.18395542  | -0.30881800 |   |             |             |             |
| N                                   | 1.55060151  | -2.73992158 | 0.26387000  |   |             |             |             |
| N                                   | -0.09306249 | -0.79635058 | 1.56570300  |   |             |             |             |
| C                                   | 2.88795451  | -1.87737258 | -2.25686500 |   |             |             |             |
| C                                   | -0.07738149 | 1.97903942  | 0.45741300  |   |             |             |             |
| C                                   | 2.48668251  | 0.26234942  | -2.53991200 |   |             |             |             |
| C                                   | 1.21469051  | 1.98432042  | -1.30910800 |   |             |             |             |
| C                                   | 2.32332551  | -3.54836458 | -0.53256500 |   |             |             |             |
| C                                   | -0.79973249 | 0.26295742  | 2.07670500  |   |             |             |             |
| C                                   | 1.09303151  | -3.53509258 | 1.28308500  |   |             |             |             |
| C                                   | -0.32953849 | -1.85499958 | 2.40834100  |   |             |             |             |
| C                                   | 3.55687051  | -1.48479158 | -3.47316700 |   |             |             |             |
| C                                   | -0.09353749 | 3.32842142  | -0.06395500 |   |             |             |             |
| C                                   | 3.31321251  | -0.15611758 | -3.64553900 |   |             |             |             |
| C                                   | 0.71072551  | 3.33224142  | -1.15959400 |   |             |             |             |
| C                                   | 2.37425951  | -4.88414758 | 0.01422700  |   |             |             |             |
| C                                   | -1.52423549 | -0.14481958 | 3.25562400  |   |             |             |             |
| C                                   | 1.61318251  | -4.87598458 | 1.14269000  |   |             |             |             |

|                                     |            |             |            |                        |           |           |           |
|-------------------------------------|------------|-------------|------------|------------------------|-----------|-----------|-----------|
| H                                   | 8.51574851 | -0.52715558 | 1.40062600 | C                      | 4.508079  | -2.322558 | -1.189129 |
| H                                   | 9.25854651 | 0.84877942  | 0.58023100 | C                      | 4.540099  | -1.078504 | -0.281564 |
| H                                   | 8.56020451 | 1.06339242  | 2.18668000 | H                      | 1.987925  | -1.552461 | 1.145947  |
| H                                   | 4.42302551 | 1.03133042  | 4.51479500 | H                      | 0.835326  | -0.723284 | -0.196221 |
| H                                   | 3.57450151 | 1.06155742  | 2.96355900 | H                      | 2.946510  | 0.031178  | -1.299245 |
| <b><sup>4</sup>ts6<sub>eq</sub></b> |            |             |            | H                      | 5.480825  | -2.827747 | -1.160009 |
| Fe                                  | -1.555339  | 0.232583    | 0.053667   | H                      | 4.346580  | -2.017079 | -2.231977 |
| N                                   | -0.674025  | 0.949208    | 1.737089   | H                      | 4.678068  | -1.427711 | 0.753859  |
| N                                   | -1.849193  | -1.531690   | 1.020754   | H                      | 1.812192  | -2.311773 | -1.827119 |
| N                                   | -1.448338  | 2.048681    | -0.804393  | O                      | 3.144847  | 0.690908  | 0.652614  |
| N                                   | -2.610768  | -0.435993   | -1.516431  | C                      | 3.174070  | 1.961940  | 0.187148  |
| C                                   | -0.271431  | 2.242087    | 1.947269   | O                      | 3.115661  | 2.274660  | -0.982511 |
| C                                   | -2.508449  | -2.629613   | 0.526786   | C                      | 3.356833  | 2.939297  | 1.327136  |
| C                                   | -0.369996  | 0.263853    | 2.884950   | H                      | 3.002122  | 3.924668  | 1.019943  |
| C                                   | -1.378535  | -1.897749   | 2.263646   | H                      | 2.836410  | 2.602101  | 2.225377  |
| C                                   | -0.896203  | 3.175303    | -0.259970  | H                      | 4.426409  | 3.012798  | 1.559618  |
| C                                   | -3.131167  | -1.694410   | -1.679199  | H                      | 3.606493  | -3.688618 | 0.230754  |
| C                                   | -1.838715  | 2.389355    | -2.069026  | C                      | 5.719910  | -0.110849 | -0.580907 |
| C                                   | -2.852644  | 0.229766    | -2.692325  | C                      | 7.066952  | -0.734841 | -0.174645 |
| C                                   | 0.296833   | 2.378520    | 3.268031   | H                      | 7.331452  | -1.588683 | -0.810069 |
| C                                   | -2.468476  | -3.708681   | 1.485339   | H                      | 7.874225  | 0.001172  | -0.269059 |
| C                                   | 0.249818   | 1.145350    | 3.844418   | H                      | 7.052158  | -1.082940 | 0.865615  |
| C                                   | -1.760237  | -3.257331   | 2.556970   | C                      | 0.911786  | -3.603291 | -0.369362 |
| C                                   | -0.937410  | 4.263583    | -1.211647  | H                      | -0.074583 | -3.146307 | -0.471391 |
| C                                   | -3.729043  | -1.822816   | -2.988093  | H                      | 0.937903  | -4.505798 | -0.992386 |
| C                                   | -1.516246  | 3.772502    | -2.339636  | H                      | 1.037858  | -3.914257 | 0.675552  |
| C                                   | -3.552192  | -0.629767   | -3.618252  | H                      | 5.575479  | 0.762455  | 0.068467  |
| H                                   | 0.674318   | 3.303717    | 3.685007   | C                      | 5.773401  | 0.395563  | -2.032002 |
| H                                   | -2.919263  | -4.681893   | 1.337163   | H                      | 4.848446  | 0.902829  | -2.321446 |
| H                                   | 0.580290   | 0.848969    | 4.831784   | H                      | 6.591471  | 1.117019  | -2.146558 |
| H                                   | -1.517220  | -3.781046   | 3.472846   | H                      | 5.961604  | -0.421717 | -2.738533 |
| H                                   | -0.560161  | 5.260961    | -1.025228  | H                      | 3.389849  | -4.166376 | -1.452878 |
| H                                   | -4.212135  | -2.717550   | -3.360120  | <b><sup>4</sup>ts7</b> |           |           |           |
| H                                   | -1.719517  | 4.282841    | -3.272424  | Fe                     | 1.522920  | -0.053930 | 0.234146  |
| H                                   | -3.860866  | -0.340705   | -4.614855  | N                      | 2.318097  | -1.685383 | -0.650728 |
| C                                   | -0.375367  | 3.278176    | 1.024717   | N                      | 0.413756  | -1.282871 | 1.428776  |
| C                                   | -3.103776  | -2.708777   | -0.728452  | N                      | 2.710312  | 1.134600  | -0.856904 |
| C                                   | -2.489509  | 1.542930    | -2.959078  | N                      | 0.901873  | 1.526628  | 1.299495  |
| C                                   | -0.666851  | -1.074449   | 3.122836   | C                      | 3.165822  | -1.683752 | -1.726975 |
| H                                   | -0.002514  | 4.251362    | 1.330047   | C                      | -0.507552 | -0.892758 | 2.364241  |
| H                                   | -3.573603  | -3.650939   | -0.995134  | C                      | 2.067521  | -3.004273 | -0.358252 |
| H                                   | -2.744579  | 1.943521    | -3.935520  | C                      | 0.418546  | -2.656434 | 1.443066  |
| H                                   | -0.360692  | -1.492463   | 4.077042   | C                      | 3.492487  | 0.757045  | -1.914942 |
| O                                   | -0.063960  | -0.222113   | -0.728397  | C                      | -0.088418 | 1.539857  | 2.250766  |
| S                                   | -3.585415  | 0.843086    | 1.340444   | C                      | 2.882882  | 2.485449  | -0.714685 |
| C                                   | -5.022792  | -0.047530   | 0.673205   | C                      | 1.332893  | 2.821907  | 1.174600  |
| H                                   | -4.866849  | -1.127669   | 0.777093   | C                      | 3.463736  | -3.038982 | -2.125503 |
| H                                   | -5.907774  | 0.230956    | 1.253060   | C                      | -1.119521 | -2.051696 | 2.974251  |
| H                                   | -5.174778  | 0.180588    | -0.384891  | C                      | 2.791258  | -3.857458 | -1.269650 |
| C                                   | 3.141961   | -0.394083   | -0.311041  | C                      | -0.536375 | -3.145366 | 2.409484  |
| C                                   | 2.047034   | -1.369725   | 0.067047   | C                      | 4.159520  | 1.911157  | -2.478208 |
| C                                   | 2.011000   | -2.624620   | -0.790256  | C                      | -0.279850 | 2.881889  | 2.746161  |
| C                                   | 3.402926   | -3.299586   | -0.778136  | C                      | 3.791393  | 2.981610  | -1.725182 |

|   |           |           |           |                        |             |             |             |
|---|-----------|-----------|-----------|------------------------|-------------|-------------|-------------|
| C | 0.614079  | 3.674963  | 2.091196  | H                      | -0.875824   | -0.856783   | -3.614364   |
| H | 4.110934  | -3.310518 | -2.949889 | H                      | -2.622372   | -1.127400   | -3.687189   |
| H | -1.879875 | -2.015443 | 3.744285  | H                      | -6.122790   | -2.318690   | -0.151957   |
| H | 2.767333  | -4.939636 | -1.250550 | H                      | -4.968666   | -1.751171   | 1.052076    |
| H | -0.724331 | -4.191479 | 2.615945  | H                      | -6.259300   | -0.054718   | -1.136064   |
| H | 4.831512  | 1.881822  | -3.326508 |                        |             |             |             |
| H | -0.999314 | 3.161366  | 3.505564  | <b><sup>4</sup>ts8</b> |             |             |             |
| H | 4.092097  | 4.016456  | -1.828831 | Fe                     | 0.96774192  | -0.46920820 | 0.00000000  |
| H | 0.772334  | 4.741043  | 2.194632  | N                      | 1.92352992  | -2.08380020 | -0.72944900 |
| C | 3.692845  | -0.550306 | -2.337646 | N                      | 0.09446592  | -1.65546820 | 1.41923900  |
| C | -0.766295 | 0.425368  | 2.729489  | N                      | 1.89414092  | 0.70371180  | -1.33643100 |
| C | 2.271500  | 3.272701  | 0.252061  | N                      | 0.17419792  | 1.15415980  | 0.89160800  |
| C | 1.200622  | -3.462671 | 0.625912  | C                      | 2.79569592  | -2.10468020 | -1.78675500 |
| H | 4.352243  | -0.704168 | -3.186459 | C                      | -0.72981608 | -1.25075320 | 2.43865200  |
| H | -1.523565 | 0.593408  | 3.489363  | C                      | 1.75056992  | -3.39310020 | -0.34964500 |
| H | 2.509976  | 4.332003  | 0.261002  | C                      | 0.17502692  | -3.02256020 | 1.51319600  |
| H | 1.101333  | -4.537717 | 0.741370  | C                      | 2.76930392  | 0.30762780  | -2.31111600 |
| O | 0.270682  | 0.125216  | -0.954219 | C                      | -0.68192508 | 1.17574180  | 1.96421600  |
| S | 3.268254  | -0.508338 | 1.859485  | C                      | 1.76116992  | 2.05957180  | -1.47419100 |
| C | 2.807456  | 0.159706  | 3.488925  | C                      | 0.26157892  | 2.44889480  | 0.44654200  |
| H | 1.886582  | -0.319170 | 3.838773  | C                      | 3.20308492  | -3.45985720 | -2.06915700 |
| H | 3.609458  | -0.081814 | 4.193066  | C                      | -1.18517408 | -2.39403120 | 3.19557500  |
| H | 2.652426  | 1.240510  | 3.453307  | C                      | 2.54971592  | -4.25928020 | -1.18201400 |
| C | -3.550727 | 0.542408  | -0.937909 | C                      | -0.62761708 | -3.49357320 | 2.61741100  |
| C | -4.696762 | 0.839022  | 0.032931  | C                      | 3.19361192  | 1.44547480  | -3.09806900 |
| C | -5.853661 | -0.162724 | -0.117608 | C                      | -1.12148608 | 2.52521280  | 2.22235000  |
| C | -5.314263 | -1.594831 | 0.018568  | C                      | 2.56413292  | 2.53301680  | -2.58082800 |
| C | -4.155050 | -1.877046 | -0.948787 | C                      | -0.53731808 | 3.31575780  | 1.27760600  |
| C | -2.979346 | -0.874154 | -0.768701 | H                      | 3.89183792  | -3.74497920 | -2.85423100 |
| H | -4.307759 | 0.804959  | 1.061161  | H                      | -1.84444008 | -2.34398120 | 4.05303000  |
| H | -5.051262 | 1.861518  | -0.145644 | H                      | 2.59317892  | -5.33674920 | -1.08579500 |
| H | -3.909285 | 0.681790  | -1.961559 | H                      | -0.73237308 | -4.53220620 | 2.90458400  |
| H | -3.794297 | -2.898979 | -0.795315 | H                      | 3.88351792  | 1.39595180  | -3.93092100 |
| H | -4.522451 | -1.825666 | -1.984239 | H                      | -1.78997608 | 2.81340280  | 3.02388500  |
| H | -2.632053 | -0.975601 | 0.270391  | H                      | 2.62853192  | 3.56608280  | -2.89814800 |
| O | -2.493350 | 1.503647  | -0.709734 | H                      | -0.62904408 | 4.38610980  | 1.14276700  |
| C | -2.447609 | 2.583274  | -1.527535 | C                      | 3.20355092  | -0.99493720 | -2.51752300 |
| O | -3.262463 | 2.808528  | -2.399769 | C                      | -1.09057408 | 0.06647180  | 2.69822300  |
| C | -1.236913 | 3.427432  | -1.227770 | C                      | 1.00063392  | 2.87736680  | -0.65065600 |
| H | -1.178146 | 3.653058  | -0.159294 | C                      | 0.93237592  | -3.83669320 | 0.68130600  |
| H | -0.338878 | 2.854454  | -1.480979 | H                      | 3.90379692  | -1.16487620 | -3.32974600 |
| H | -1.278855 | 4.347631  | -1.812527 | H                      | -1.76579808 | 0.24335980  | 3.53017600  |
| C | -1.785719 | -1.195074 | -1.686607 | H                      | 0.98196892  | 3.93869280  | -0.87919500 |
| C | -1.342953 | -2.649123 | -1.660523 | H                      | 0.89868592  | -4.90649020 | 0.86378700  |
| H | -2.016622 | -3.271448 | -2.269923 | O                      | -0.37413808 | -0.63292120 | -1.09248200 |
| H | -0.338054 | -2.754548 | -2.081685 | S                      | 2.83413892  | -0.51219720 | 1.56373100  |
| H | -1.331027 | -3.061672 | -0.647824 | C                      | 2.47488292  | 0.54673880  | 2.99818700  |
| C | -6.985420 | 0.124896  | 0.875540  | H                      | 1.61442492  | 0.14455680  | 3.54518700  |
| H | -7.376722 | 1.141486  | 0.750224  | H                      | 3.34400992  | 0.53240380  | 3.66266600  |
| H | -7.818802 | -0.574995 | 0.740013  | H                      | 2.24722392  | 1.57046080  | 2.69158500  |
| H | -6.633899 | 0.028054  | 1.911108  | C                      | -6.02243308 | -0.15899020 | -0.58662200 |
| H | -0.716540 | -0.545231 | -1.153737 | C                      | -7.38664908 | -0.58644520 | -0.03784400 |
| C | -1.821529 | -0.643961 | -3.104286 | C                      | -7.94118108 | -1.82331820 | -0.76752900 |
| H | -1.988310 | 0.434500  | -3.150535 | C                      | -6.90729008 | -2.96138720 | -0.72275000 |



|                         |              |             |             |   |             |             |             |
|-------------------------|--------------|-------------|-------------|---|-------------|-------------|-------------|
| C                       | -5.54189908  | -2.51928420 | -1.26948100 | C | -4.07063773 | -0.75498403 | -2.97962500 |
| C                       | -4.98476808  | -1.29104420 | -0.52059300 | H | 1.67330627  | 2.76716797  | 3.43689800  |
| H                       | -7.28156708  | -0.80784020 | 1.03428100  | H | -0.35022573 | -5.26698903 | -0.29235100 |
| H                       | -8.08633708  | 0.25449980  | -0.12519300 | H | 2.51572727  | 0.21663797  | 3.80692900  |
| H                       | -6.13738608  | 0.20104280  | -1.61166000 | H | 1.35225327  | -4.43478203 | 1.64520700  |
| H                       | -4.82575708  | -3.34668120 | -1.19999800 | H | -1.82551973 | 5.11804197  | 0.31096200  |
| H                       | -5.64313208  | -2.28502920 | -2.33826800 | H | -3.91601673 | -2.92187003 | -3.35957700 |
| H                       | -4.88698908  | -1.56620420 | 0.54142600  | H | -3.59590273 | 4.27649697  | -1.56205800 |
| O                       | -5.53738708  | 0.95144280  | 0.21840800  | H | -4.82658573 | -0.38604503 | -3.66120000 |
| C                       | -5.59668108  | 2.19651380  | -0.31073800 | C | -0.34050873 | 2.94377097  | 1.42041200  |
| O                       | -6.04265508  | 2.45686280  | -1.40773200 | C | -1.88945873 | -3.09837903 | -1.36077200 |
| C                       | -5.01410908  | 3.20740180  | 0.65147800  | C | -3.47839073 | 1.44232997  | -1.93252000 |
| H                       | -3.93634608  | 3.03817280  | 0.75865500  | C | 1.16875927  | -1.61265303 | 2.08152100  |
| H                       | -5.18886808  | 4.21417180  | 0.26974800  | H | -0.08210573 | 3.90476297  | 1.85494000  |
| H                       | -5.46427108  | 3.09531580  | 1.64280800  | H | -2.11979673 | -4.05120203 | -1.82817000 |
| C                       | -3.56486308  | -0.84356820 | -0.99468000 | H | -4.21838073 | 1.92142097  | -2.56642000 |
| C                       | -2.53108208  | -1.90427020 | -0.67837600 | H | 1.90632727  | -2.09006703 | 2.71928000  |
| H                       | -2.41386208  | -2.70652620 | -1.41157600 | O | 0.08719127  | 0.22039597  | -1.24239600 |
| H                       | -1.30406908  | -1.25541520 | -0.80890100 | S | -2.56773873 | -0.55236303 | 1.87460300  |
| H                       | -2.51955408  | -2.26785320 | 0.35103300  | C | -3.85067773 | -1.73344603 | 1.35790000  |
| C                       | -9.29646408  | -2.25166220 | -0.19313800 | H | -3.37906173 | -2.66468903 | 1.02481200  |
| H                       | -10.03214908 | -1.44120220 | -0.25962600 | H | -4.48524573 | -1.95498203 | 2.22096500  |
| H                       | -9.70010608  | -3.11647220 | -0.73322700 | H | -4.45209373 | -1.33482003 | 0.53718200  |
| H                       | -9.20375108  | -2.53212320 | 0.86411800  | C | 5.76282327  | -0.43598403 | -0.66860000 |
| C                       | -3.48770708  | -0.41781720 | -2.47058500 | C | 4.58971827  | -1.23537003 | -1.24680300 |
| H                       | -4.18481608  | 0.39495080  | -2.70177000 | C | 3.25963627  | -0.45217903 | -1.12592500 |
| H                       | -2.47565508  | -0.06544420 | -2.69229900 | C | 3.40607727  | 0.92836397  | -1.78626900 |
| H                       | -3.70313108  | -1.25516620 | -3.14559800 | C | 4.59579527  | 1.70979897  | -1.21057900 |
| H                       | -7.27712908  | -3.82479120 | -1.29172000 | C | 5.92761227  | 0.93731097  | -1.33640100 |
| H                       | -6.79323008  | -3.29971820 | 0.31866700  | H | 4.79729727  | -1.45346903 | -2.30367600 |
| H                       | -8.09064608  | -1.55044320 | -1.82438600 | H | 4.51701127  | -2.19364003 | -0.72037100 |
| H                       | -3.32025908  | 0.03497580  | -0.38251300 | H | 5.62867327  | -0.33140303 | 0.41195000  |
|                         |              |             |             | H | 4.68069227  | 2.67735097  | -1.71866800 |
|                         |              |             |             | H | 4.39527627  | 1.93183397  | -0.15306500 |
|                         |              |             |             | H | 6.09559527  | 0.74284897  | -2.40775700 |
|                         |              |             |             | H | 3.07068227  | -0.29911803 | -0.05225800 |
|                         |              |             |             | O | 6.99272427  | -1.18638903 | -0.88555300 |
|                         |              |             |             | C | 7.34372027  | -2.09561403 | 0.05130200  |
|                         |              |             |             | O | 6.70707627  | -2.32219903 | 1.05873100  |
|                         |              |             |             | C | 8.63679327  | -2.78155803 | -0.33144300 |
|                         |              |             |             | H | 8.52472127  | -3.28222203 | -1.29888200 |
|                         |              |             |             | H | 9.43881127  | -2.04351703 | -0.43798000 |
|                         |              |             |             | H | 8.90320627  | -3.51042703 | 0.43487900  |
|                         |              |             |             | H | 3.54470327  | 0.79255297  | -2.86992300 |
|                         |              |             |             | C | 7.17331627  | 1.71861197  | -0.83071500 |
|                         |              |             |             | C | 7.47275827  | 2.93878097  | -1.71707600 |
|                         |              |             |             | H | 6.69977127  | 3.71109697  | -1.62496200 |
|                         |              |             |             | H | 8.42683127  | 3.39776897  | -1.43168600 |
|                         |              |             |             | H | 7.54079927  | 2.65781097  | -2.77520200 |
|                         |              |             |             | C | 2.10867827  | -1.24861303 | -1.69381600 |
|                         |              |             |             | H | 1.93484327  | -2.22419703 | -1.23693900 |
|                         |              |             |             | H | 0.95128627  | -0.53050103 | -1.37850000 |
|                         |              |             |             | H | 2.04695927  | -1.27643103 | -2.78550000 |
|                         |              |             |             | H | 8.02172827  | 1.03011197  | -0.93579500 |
| <b><sup>4</sup>ts10</b> |              |             |             |   |             |             |             |
| Fe                      | -1.09970673  | -0.05865103 | 0.00000000  |   |             |             |             |
| N                       | 0.12674227   | 0.53523597  | 1.49383000  |   |             |             |             |
| N                       | -0.48568273  | -1.98311003 | 0.30975700  |   |             |             |             |
| N                       | -1.76022673  | 1.82118197  | -0.23132500 |   |             |             |             |
| N                       | -2.45934073  | -0.70667703 | -1.32695500 |   |             |             |             |
| C                       | 0.32301927   | 1.82555397  | 1.91301900  |   |             |             |             |
| C                       | -0.90914773  | -3.09355103 | -0.37353800 |   |             |             |             |
| C                       | 1.00357327   | -0.23906003 | 2.21503400  |   |             |             |             |
| C                       | 0.47031427   | -2.42089503 | 1.19531600  |   |             |             |             |
| C                       | -1.30585373  | 2.93495197  | 0.42265000  |   |             |             |             |
| C                       | -2.60102673  | -1.98787103 | -1.80032800 |   |             |             |             |
| C                       | -2.73363273  | 2.25599397  | -1.08989700 |   |             |             |             |
| C                       | -3.33525073  | 0.06488397  | -2.04756500 |   |             |             |             |
| C                       | 1.33779427   | 1.86683297  | 2.93793600  |   |             |             |             |
| C                       | -0.19942673  | -4.26438803 | 0.08761100  |   |             |             |             |
| C                       | 1.76073627   | 0.58594197  | 3.12458800  |   |             |             |             |
| C                       | 0.65588527   | -3.84642103 | 1.06131800  |   |             |             |             |
| C                       | -2.00287473  | 4.11217997  | -0.04811400 |   |             |             |             |
| C                       | -3.61237473  | -2.02833403 | -2.82883600 |   |             |             |             |
| C                       | -2.89084873  | 3.69026297  | -0.98648800 |   |             |             |             |

---

|   |            |            |            |   |            |            |             |
|---|------------|------------|------------|---|------------|------------|-------------|
| C | 7.10029627 | 2.13327397 | 0.64885600 | H | 6.29630327 | 2.85666897 | 0.82946500  |
| H | 6.93697727 | 1.27702997 | 1.31302000 | H | 2.47702527 | 1.49396397 | -1.65481600 |
| H | 8.04007327 | 2.60819297 | 0.95510200 |   |            |            |             |
